# Supplementary material
Source: MDPI journal article supplement (https://www.mdpi.com/2673-6500/3/4/27)
Supplement: s1 [file s1]

## Supplementary Materials

**Table S1.** Catalog of all specimens deposited at the NNHC, HUI including Type specimens.

| Specimen ID    | Family        | Scientific Name                            | Specimens | Year | Month    | Day | Locality                           | Region                 | North | East  | Collectors     |
|----------------|---------------|--------------------------------------------|-----------|------|----------|-----|------------------------------------|------------------------|-------|-------|----------------|
| HUIJINVPSE 567 | Cheliferidae  | <i>Dactylochelifer pallidus</i>            | Type      | 1940 | October  | 27  | Hula                               | Galil                  | 33.07 | 35.6  |                |
| HUIJINVPSE 571 | Cheliferidae  | <i>Rhacochelifer corcyrensis bicolor</i>   | Allotype  | 1951 | May      | 4   | Jerusalem                          | Judea                  | 31.77 | 35.21 | Wahrman J. W.  |
| HUIJINVPSE 570 | Cheliferidae  | <i>Rhacochelifer corcyrensis bicolor</i>   | Type      | 1957 | August   | 16  | En Gedi                            | Dead Sea               | 31.47 | 35.39 | Wahrman J. W.  |
| HUIJINVPSE 568 | Cheliferidae  | <i>Rhacochelifer longeuungiculatus</i>     | Type      | 1944 | March    | 19  | En Gedi                            | Dead Sea               | 31.47 | 35.39 | Steinitz       |
| HUIJINVPSE 569 | Cheliferidae  | <i>Rhacochelifer peculiaris latissimus</i> | Type      | 1944 | January  | 7   | Betlehem                           | Judea                  | 31.71 | 35.2  | Haas, Steinitz |
| HUIJINVPSE 565 | Chernetidae   | <i>Nudochernes spalacis</i>                | Type      | 1953 | March    | 24  | Jerusalem                          | Judea                  | 31.77 | 35.21 |                |
| HUIJINVPSE 557 | Chthoniidae   | <i>Ephippiochthonius sacer</i>             | Holotype  | 1948 |          |     | Jerusalem                          | Judea                  | 31.77 | 35.21 | Theodor        |
| HUIJINVPSE 563 | Geogarypidae  | <i>Geogarypus pulcher</i>                  | Holotype  | 1944 | March    | 16  | Kfar Mallal                        | Sharon                 | 32.17 | 34.89 | Moscona        |
| HUIJINVPSE 564 | Geogarypidae  | <i>Geogarypus shulovi</i>                  | Holotype  | 1945 | March    | 13  | Dalia                              | Samaria                | 32.59 | 35.07 | Shulov A.      |
| HUIJINVPSE 560 | Hesperolpidae | <i>Calocheirus atopus</i>                  | Type      | 1944 | March    | 17  | Horvot Mezada Plateau              | Judea                  | 31.31 | 35.36 | Steinitz       |
| HUIJINVPSE 561 | Hesperolpidae | <i>Calocheirus atopus</i>                  | Allotype  | 1952 | March    | 24  | Nahal Lavan (= Wadi Abyad)         | Negev                  | 30.95 | 34.39 | Wahrman J. W.  |
| HUIJINVPSE 562 | Hesperolpidae | <i>Cardiolum stupidum</i>                  | Type      | 1953 | May      | 5   | Aqua Bella (En Hemed)              | Judea                  | 31.8  | 35.13 | Wahrman J. W.  |
| HUIJINVPSE 558 | Menthidae     | <i>Paramenthus shulovi</i>                 | Type      | 1959 | March    | 11  | Be'er Sheva - Yeruham road (24 km) | Negev                  | 31.05 | 34.84 | Shulov A.      |
| HUIJINVPSE 559 | Olpidae       | <i>Halominniza aegyptiaca litoralis</i>    | Type      | 1947 | March    | 21  | Aqaba gulf                         | Arava                  | 29.54 | 34.97 | Shulov A.      |
| HUIJINVPSE 566 | Withiidae     | <i>Nannowithius wahrmani</i>               | Type      | 1952 | March    | 27  | Nahal Lavan (= Wadi Abyad)         | Negev                  | 30.95 | 34.39 | Wahrman J. W.  |
| HUIJINVPSE 746 | Atemnidae     | <i>Atemnus</i>                             | 1         | 2014 | March    | 10  | Ein Prat Shever cave               | Judean Desert          | 31.84 | 35.31 | Aharon S., EGR |
| HUIJINVPSE 709 | Cheiridiidae  | <i>Apocheiridium</i>                       | 1         | 2018 | July     | 31  | Sela cave                          | Judea desert           | 31.25 | 35.23 | Aharon S.      |
| HUIJINVPSE 832 | Cheliferidae  | <i>Chelifer cancroides</i>                 | 1         | 2022 | April    | 21  | Pardes Hanna                       | Emek Hefer             | 32.48 | 34.97 | Warburg S.     |
| HUIJINVPSE 701 | Cheliferidae  | <i>Chelifer cancroides</i>                 | 2         | 1963 | April    | 28  | Lahav                              | Negev                  | 31.38 | 34.86 | Levy G. L.     |
| HUIJINVPSE 739 | Cheliferidae  | <i>Chelifer cancroides</i>                 | 1         | 2021 | March    | 23  | Givat Bashit, Asseret              | Shfelat Yehudah        | 31.84 | 34.74 | Shacham B.     |
| HUIJINVPSE 364 | Cheliferidae  | <i>Chelifer cancroides</i>                 | 1         | 1944 | April    | 21  | Jerusalem                          | Judea                  | 31.77 | 35.21 |                |
| HUIJINVPSE 703 | Cheliferidae  | <i>Chelifer cancroides</i>                 | 1         | 2022 | January  | 3   | Jerusalem Givat Ram                | Judea                  | 31.77 | 35.2  | Avrech O.      |
| HUIJINVPSE 738 | Cheliferidae  | <i>Chelifer cancroides</i>                 | 1         | 2022 | February | 22  | Jerusalem Givat Ram                | Judea                  | 31.77 | 35.2  | Avrech O.      |
| HUIJINVPSE 67  | Cheliferidae  | <i>Chelifer cancroides</i>                 | 1         | 1945 | August   | 9   | Jerusalem - Jericho                | Dead Sea               | 31.87 | 35.46 | Shulov A.      |
| HUIJINVPSE 752 | Cheliferidae  | <i>Chelifer cancroides</i>                 | 1         | 2022 | February | 24  | Beer Sheva Beehive                 | Negev                  | 31.31 | 34.79 | Phavtulov J.   |
| HUIJINVPSE 63  | Cheliferidae  | <i>Dactylochelifer kussariensis</i>        | 3         | 1944 | February | 19  | bank of river Na'aman              | Northern Coastal Plain | 32.91 | 35.09 | Moskona        |
| HUIJINVPSE 60  | Cheliferidae  | <i>Dactylochelifer pallidus</i>            | 1         | 1940 | April    | 15  | Hula                               | Hula Valley            | 33.07 | 35.6  |                |
| HUIJINVPSE 62  | Cheliferidae  | <i>Dactylochelifer pallidus</i>            | 1         | 1940 | April    | 26  | Hula                               | Hula Valley            | 33.07 | 35.6  |                |

|               |              |                                  |   |      |           |    |                      |                         |       |       |                  |
|---------------|--------------|----------------------------------|---|------|-----------|----|----------------------|-------------------------|-------|-------|------------------|
| HUJINVPSE 64  | Cheliferidae | <i>Dactylochelifera pallidus</i> | 1 | 1940 | October   | 27 | Hula                 | Hula Valley             | 33.07 | 35.6  |                  |
| HUJINVPSE 66  | Cheliferidae | <i>Dactylochelifera pallidus</i> | 1 | 1940 | March     | 21 | Hula Yessod HaMa'ala | Hula Valley             | 33.07 | 35.6  |                  |
| HUJINVPSE 65  | Cheliferidae | <i>Dactylochelifera pallidus</i> | 1 | 1941 | April     | 15 | Hula                 | Hula Valley             | 33.07 | 35.6  |                  |
| HUJINVPSE 244 | Cheliferidae | <i>Dactylochelifera pallidus</i> | 1 | 1967 | April     | 19 | Hula Nature Reserve  | Hula Valley             | 33.07 | 35.6  | Margalith Y. M.  |
| HUJINVPSE 231 | Cheliferidae | <i>Dactylochelifera pallidus</i> | 1 | 2000 | June      | 29 | Hula, Lake           | Hula Valley             | 33.07 | 35.6  | Dimentman Ch. D. |
| HUJINVPSE 585 | Cheliferidae | <i>Dactylochelifera pallidus</i> | 1 | 2017 | June      | 11 | Hula Nature Reserve  | Hula Valley             | 33.07 | 35.6  | Opiliones curse  |
| HUJINVPSE 589 | Cheliferidae | <i>Dactylochelifera pallidus</i> | 4 | 2017 | June      | 11 | Hula Nature Reserve  | Hula Valley             | 33.07 | 35.6  | Opiliones curse  |
| HUJINVPSE 438 | Cheliferidae | <i>Hysterochelifera</i>          | 2 | 1967 | April     | 6  | Mishmar Ha'emek      | Jezreel Valley          | 32.61 | 35.14 | Costa M. C.      |
| HUJINVPSE 425 | Cheliferidae | <i>Hysterochelifera</i>          | 1 | 1975 | May       | 7  | Ramat Rahel          | Judea                   | 31.74 | 35.22 | Faunistics       |
| HUJINVPSE 592 | Cheliferidae | <i>Hysterochelifera</i>          | 2 | 2017 | June      | 19 | Hirbat Sa'adim       | Judea                   | 31.75 | 35.13 | Opiliones curse  |
| HUJINVPSE 24  | Cheliferidae | <i>Hysterochelifera cyprius</i>  | 2 | 1944 | March     | 28 | Elon                 | Galilee - Upper Western | 33.07 | 35.21 | Shulov A.        |
| HUJINVPSE 26  | Cheliferidae | <i>Hysterochelifera cyprius</i>  | 6 | 1944 | March     | 27 | Elon - Wadi Karkara  | Galilee - Upper Western | 33.07 | 35.22 | Haas G. H.       |
| HUJINVPSE 32  | Cheliferidae | <i>Hysterochelifera cyprius</i>  | 1 | 1946 | May       | 12 | Daphne`              | Galilee - Upper Eastern | 33.24 | 35.64 | Shulov A.        |
| HUJINVPSE 22  | Cheliferidae | <i>Hysterochelifera cyprius</i>  | 1 | 1951 | September | 5  | Rosh Pina            | Galilee - Eastern       | 32.96 | 35.54 | Amitai P. A.     |
| HUJINVPSE 29  | Cheliferidae | <i>Hysterochelifera cyprius</i>  | 1 | 1951 | September | 5  | Rosh Pina            | Galilee - Eastern       | 32.96 | 35.54 | Amitai P. A.     |
| HUJINVPSE 30  | Cheliferidae | <i>Hysterochelifera cyprius</i>  | 1 | 1951 | September | 5  | Rosh Pina            | Galilee - Eastern       | 32.96 | 35.54 | Amitai P. A.     |
| HUJINVPSE 47  | Cheliferidae | <i>Hysterochelifera cyprius</i>  | 1 | 1951 | September | 5  | Rosh Pina            | Galilee - Eastern       | 32.96 | 35.54 | Amitai P. A.     |
| HUJINVPSE 650 | Cheliferidae | <i>Hysterochelifera cyprius</i>  | 1 | 2020 | May       | 10 | JNF Qiryat Shmona    | Galilee                 | 33.2  | 35.57 | Shacham B.       |
| HUJINVPSE 48  | Cheliferidae | <i>Hysterochelifera cyprius</i>  | 1 |      |           |    | Carmel               | Carmel                  | 32.74 | 35.03 |                  |
| HUJINVPSE 678 | Cheliferidae | <i>Hysterochelifera cyprius</i>  | 1 | 1967 | March     | 31 | Tivon                | Jezreel valley          | 32.72 | 35.12 | Costa M. C.      |
| HUJINVPSE 251 | Cheliferidae | <i>Hysterochelifera cyprius</i>  | 1 | 1961 | May       | 12 | Ar'ara               | Samaria                 | 32.5  | 35.11 | Amitai P. A.     |
| HUJINVPSE 407 | Cheliferidae | <i>Hysterochelifera cyprius</i>  | 1 | 1961 | May       | 12 | Ar'ara               | Carmel                  | 32.5  | 35.11 | Amitai P. A.     |
| HUJINVPSE 408 | Cheliferidae | <i>Hysterochelifera cyprius</i>  | 1 | 1961 | May       | 12 | Ar'ara               | Carmel                  | 32.5  | 35.11 | Amitai P. A.     |
| HUJINVPSE 409 | Cheliferidae | <i>Hysterochelifera cyprius</i>  | 1 | 1961 | May       | 12 | Ar'ara               | Carmel                  | 32.5  | 35.11 | Amitai P. A.     |
| HUJINVPSE 410 | Cheliferidae | <i>Hysterochelifera cyprius</i>  | 1 | 1961 | May       | 12 | Ar'ara               | Carmel                  | 32.5  | 35.11 | Amitai P. A.     |
| HUJINVPSE 411 | Cheliferidae | <i>Hysterochelifera cyprius</i>  | 1 | 1961 | May       | 12 | Ar'ara               | Carmel                  | 32.5  | 35.11 | Amitai P. A.     |
| HUJINVPSE 412 | Cheliferidae | <i>Hysterochelifera cyprius</i>  | 1 | 1961 | May       | 12 | Ar'ara               | Carmel                  | 32.5  | 35.11 | Amitai P. A.     |
| HUJINVPSE 413 | Cheliferidae | <i>Hysterochelifera cyprius</i>  | 1 | 1961 | May       | 12 | Ar'ara               | Carmel                  | 32.5  | 35.11 | Amitai P. A.     |
| HUJINVPSE 19  | Cheliferidae | <i>Hysterochelifera cyprius</i>  | 1 | 1952 | November  | 2  | Tel-Aviv-Jaffa       | Coastal plain           | 32.1  | 34.78 | Wahrman J. W.    |

|               |              |                                |    |      |          |    |                            |                        |       |       |                |
|---------------|--------------|--------------------------------|----|------|----------|----|----------------------------|------------------------|-------|-------|----------------|
| HUJINVPSE 414 | Cheliferidae | <i>Hysterochelifer cyprius</i> | 1  | 1961 | May      | 28 | Ylanot                     | Coastal plain          | 32.29 | 34.9  | Halperin J. H. |
| HUJINVPSE 415 | Cheliferidae | <i>Hysterochelifer cyprius</i> | 2  | 1961 | June     | 19 | Ylanot                     | Coastal plain          | 32.29 | 34.9  | Halperin J. H. |
| HUJINVPSE 416 | Cheliferidae | <i>Hysterochelifer cyprius</i> | 1  | 1961 | May      | 28 | Ylanot                     | Coastal plain          | 32.29 | 34.9  | Halperin J. H. |
| HUJINVPSE 417 | Cheliferidae | <i>Hysterochelifer cyprius</i> | 1  | 1961 | July     | 4  | Ylanot                     | Coastal plain          | 32.29 | 34.9  | Halperin J. H. |
| HUJINVPSE 418 | Cheliferidae | <i>Hysterochelifer cyprius</i> | 1  | 1961 | June     | 21 | Ylanot                     | Coastal plain          | 32.29 | 34.9  | Halperin J. H. |
| HUJINVPSE 454 | Cheliferidae | <i>Hysterochelifer cyprius</i> | 1  | 1972 | February | 14 | Sidni Ali                  | Coastal plain          | 32.19 | 34.81 | Tsabar G. T.   |
| HUJINVPSE 460 | Cheliferidae | <i>Hysterochelifer cyprius</i> | 1  | 1972 | February | 14 | Sidni Ali                  | Coastal plain          | 32.19 | 34.81 | Tsabar G. T.   |
| HUJINVPSE 495 | Cheliferidae | <i>Hysterochelifer cyprius</i> | 1  | 1972 | February | 14 | Sidni Ali                  | Coastal plain          | 32.19 | 34.81 | Tsabar G. T.   |
| HUJINVPSE 496 | Cheliferidae | <i>Hysterochelifer cyprius</i> | 1  | 1972 | February | 14 | Sidni Ali                  | Coastal plain          | 32.19 | 34.81 | Tsabar G. T.   |
| HUJINVPSE 507 | Cheliferidae | <i>Hysterochelifer cyprius</i> | 1  | 1972 | February | 14 | Sidni Ali                  | Coastal plain          | 32.19 | 34.81 | Tsabar G. T.   |
| HUJINVPSE 532 | Cheliferidae | <i>Hysterochelifer cyprius</i> | 1  | 1972 | February | 14 | Sidni Ali                  | Coastal plain          | 32.19 | 34.81 | Tsabar G. T.   |
| HUJINVPSE 534 | Cheliferidae | <i>Hysterochelifer cyprius</i> | 1  | 1972 | February | 14 | Sidni Ali                  | Coastal plain          | 32.19 | 34.81 | Tsabar G. T.   |
| HUJINVPSE 291 | Cheliferidae | <i>Hysterochelifer cyprius</i> | 1  | 1965 | January  | 20 | Bet Dagan                  | Coastal plain          | 31.99 | 34.83 | Amitai P. A.   |
| HUJINVPSE 490 | Cheliferidae | <i>Hysterochelifer cyprius</i> | 1  | 1971 | April    | 23 | Rishon Le'Zion             | Coastal plain          | 31.95 | 34.78 | Tsabar G. T.   |
| HUJINVPSE 529 | Cheliferidae | <i>Hysterochelifer cyprius</i> | 29 | 1980 | April    | 8  | Lod                        | Coastal plain          | 31.96 | 34.88 | Galker E. G.   |
| HUJINVPSE 652 | Cheliferidae | <i>Hysterochelifer cyprius</i> | 1  | 2017 | November | 18 | Soreq swamp                | Shfelat Yehudah        | 31.94 | 34.73 | Shacham B.     |
| HUJINVPSE 662 | Cheliferidae | <i>Hysterochelifer cyprius</i> | 1  | 2017 | April    | 1  | Ashdod sand dunes          | Southern Coastal Plain | 31.76 | 34.63 | Shacham B.     |
| HUJINVPSE 665 | Cheliferidae | <i>Hysterochelifer cyprius</i> | 1  | 2017 | April    | 7  | Ashdod sand dunes          | Southern Coastal Plain | 31.76 | 34.63 | Shacham B.     |
| HUJINVPSE 669 | Cheliferidae | <i>Hysterochelifer cyprius</i> | 1  | 2017 | November | 18 | Soreq swamp                | Shfelat Yehudah        | 31.94 | 34.73 | Shacham B.     |
| HUJINVPSE 670 | Cheliferidae | <i>Hysterochelifer cyprius</i> | 1  | 2017 | November | 28 | Ashdod sand dunes          | Southern Coastal Plain | 31.76 | 34.63 | Shacham B.     |
| HUJINVPSE 673 | Cheliferidae | <i>Hysterochelifer cyprius</i> | 1  | 2017 | November | 18 | Soreq swamp                | Shfelat Yehudah        | 31.94 | 34.73 | Shacham B.     |
| HUJINVPSE 656 | Cheliferidae | <i>Hysterochelifer cyprius</i> | 1  | 2019 | December | 12 | Ashdod sand dunes          | Southern Coastal Plain | 31.76 | 34.63 | Shacham B.     |
| HUJINVPSE 658 | Cheliferidae | <i>Hysterochelifer cyprius</i> | 2  | 2019 | April    |    | Yad Mordechai cemetary     | Southern Coastal Plain | 31.6  | 34.55 | Shacham B.     |
| HUJINVPSE 659 | Cheliferidae | <i>Hysterochelifer cyprius</i> | 1  | 2019 | April    |    | Yad Mordechai cemetary     | Southern Coastal Plain | 31.6  | 34.55 | Shacham B.     |
| HUJINVPSE 935 | Cheliferidae | <i>Hysterochelifer cyprius</i> | 4  | 2022 | October  | 29 | Nahal Shiqma near Or Haner | Southern coastal Plain | 31.56 | 34.61 | Shacham B.     |
| HUJINVPSE 33  | Cheliferidae | <i>Hysterochelifer cyprius</i> | 1  | 1952 | June     | 20 | Hartuv                     | Shfelat Yehudah        | 31.77 | 34.99 | Pener M. P.    |
| HUJINVPSE 21  | Cheliferidae | <i>Hysterochelifer</i>         | 10 | 1957 | August   | 1  | Hartuv                     | Shfelat                | 31.38 | 34.86 | Wahrman J.     |

|               |              |                                |   |      |          |    |                                 |                 |       |       |                  |
|---------------|--------------|--------------------------------|---|------|----------|----|---------------------------------|-----------------|-------|-------|------------------|
|               |              | <i>cyprius</i>                 |   |      |          |    |                                 | Yehudah         |       | W.    |                  |
| HUJINVPSE 25  | Cheliferidae | <i>Hysterochelifer cyprius</i> | 1 | 1957 | June     | 20 | Hartuv                          | Shfelat Yehudah | 30.99 | 34.73 | Pener M. P.      |
| HUJINVPSE 27  | Cheliferidae | <i>Hysterochelifer cyprius</i> | 1 | 1957 | June     | 20 | Hartuv                          | Shfelat Yehudah | 30.61 | 34.6  | Pener M. P.      |
| HUJINVPSE 31  | Cheliferidae | <i>Hysterochelifer cyprius</i> | 1 | 1957 | June     | 20 | Hartuv                          | Shfelat Yehudah | 30.22 | 34.47 | Pener M. P.      |
| HUJINVPSE 36  | Cheliferidae | <i>Hysterochelifer cyprius</i> | 1 | 1957 | June     | 20 | Hartuv                          | Shfelat Yehudah | 29.84 | 34.34 | Pener M. P.      |
| HUJINVPSE 41  | Cheliferidae | <i>Hysterochelifer cyprius</i> | 1 | 1957 | June     | 20 | Hartuv                          | Shfelat Yehudah | 29.45 | 34.21 | Pener M. P.      |
| HUJINVPSE 42  | Cheliferidae | <i>Hysterochelifer cyprius</i> | 1 | 1957 | June     | 20 | Hartuv                          | Shfelat Yehudah | 29.06 | 34.08 | Pener M. P.      |
| HUJINVPSE 43  | Cheliferidae | <i>Hysterochelifer cyprius</i> | 1 | 1957 | June     | 20 | Hartuv                          | Shfelat Yehudah | 28.68 | 33.95 | Pener M. P.      |
| HUJINVPSE 49  | Cheliferidae | <i>Hysterochelifer cyprius</i> | 1 | 1957 | June     | 20 | Hartuv                          | Shfelat Yehudah | 28.29 | 33.83 | Pener M. P.      |
| HUJINVPSE 50  | Cheliferidae | <i>Hysterochelifer cyprius</i> | 1 | 1957 | June     | 20 | Hartuv                          | Shfelat Yehudah | 27.9  | 33.7  | Pener M. P.      |
| HUJINVPSE 55  | Cheliferidae | <i>Hysterochelifer cyprius</i> | 5 | 1957 | May      | 26 | Hartuv                          | Shfelat Yehudah | 27.52 | 33.57 | Wahrman J.       |
| HUJINVPSE 44  | Cheliferidae | <i>Hysterochelifer cyprius</i> | 1 | 1958 | June     | 20 | Hartuv                          | Shfelat Yehudah | 27.13 | 33.44 | Pener M. P.      |
| HUJINVPSE 260 | Cheliferidae | <i>Hysterochelifer cyprius</i> | 1 | 1961 | August   | 30 | Lahav                           | Negev           | 31.38 | 34.86 | Pener M. P.      |
| HUJINVPSE 315 | Cheliferidae | <i>Hysterochelifer cyprius</i> | 1 | 1961 | August   | 17 | Hartuv                          | Shfelat Yehudah | 27.13 | 33.44 | Amitai P. A.     |
| HUJINVPSE 329 | Cheliferidae | <i>Hysterochelifer cyprius</i> | 1 | 1961 | August   | 17 | Hartuv                          | Shfelat Yehudah | 27.13 | 33.44 | Amitai P. A.     |
| HUJINVPSE 402 | Cheliferidae | <i>Hysterochelifer cyprius</i> | 1 | 1961 | August   | 17 | Hartuv                          | Shfelat Yehudah | 27.13 | 33.44 | Amitai P. A.     |
| HUJINVPSE 240 | Cheliferidae | <i>Hysterochelifer cyprius</i> | 1 | 1963 | April    | 28 | Lahav                           | Negev           | 31.38 | 34.86 | Levy G. L.       |
| HUJINVPSE 651 | Cheliferidae | <i>Hysterochelifer cyprius</i> | 1 | 2017 | December | 4  | Tel Mahoz                       | Shfelat Yehudah | 31.92 | 34.74 | Shacham B.       |
| HUJINVPSE 657 | Cheliferidae | <i>Hysterochelifer cyprius</i> | 1 | 2017 | December | 4  | Tel Mahoz                       | Shfelat Yehudah | 31.92 | 34.74 | Shacham B.       |
| HUJINVPSE 660 | Cheliferidae | <i>Hysterochelifer cyprius</i> | 1 | 2017 | December | 4  | Tel Mahoz                       | Shfelat Yehudah | 31.92 | 34.74 | Shacham B.       |
| HUJINVPSE 666 | Cheliferidae | <i>Hysterochelifer cyprius</i> | 1 | 2017 | December | 4  | Tel Mahoz                       | Shfelat Yehudah | 31.92 | 34.74 | Shacham B.       |
| HUJINVPSE 601 | Cheliferidae | <i>Hysterochelifer cyprius</i> | 3 | 2018 | February | 27 | Canada Park                     | Shfelat Yehudah | 31.84 | 35    | Sinaiko G.       |
| HUJINVPSE 23  | Cheliferidae | <i>Hysterochelifer cyprius</i> | 1 | 1944 | March    | 6  | E of Ras Abu Amar               | Judea           | 31.73 | 35.11 |                  |
| HUJINVPSE 20  | Cheliferidae | <i>Hysterochelifer cyprius</i> | 1 | 1952 | August   | 5  | Qiryat Anavim                   | Judea           | 31.81 | 35.12 | Wahrman J. W.    |
| HUJINVPSE 28  | Cheliferidae | <i>Hysterochelifer cyprius</i> | 1 | 1952 | October  | 12 | Qiryat Anavim                   | Judea           | 31.81 | 35.12 | Wahrman J. W.    |
| HUJINVPSE 278 | Cheliferidae | <i>Hysterochelifer cyprius</i> | 1 | 1961 | June     | 17 | Hirbat Sa'adim, (Khirbat Saida) | Judea           | 31.75 | 35.13 | Wahrman          |
| HUJINVPSE 482 | Cheliferidae | <i>Hysterochelifer cyprius</i> | 1 | 1964 | March    | 24 | Hirbat Sa'adim, (Khirbat Saida) | Judea           | 31.75 | 35.13 | Katznelson M. K. |
| HUJINVPSE 548 | Cheliferidae | <i>Hysterochelifer cyprius</i> | 1 | 1971 | March    | 25 | En Mata                         | Judea           | 31.72 | 35.05 | Tsabar G. T.     |
| HUJINVPSE 577 | Cheliferidae | <i>Hysterochelifer cyprius</i> | 9 | 2017 | June     | 19 | Soreq Nature Reserve            | Judea           | 31.8  | 35.07 | Opiliones curse  |
| HUJINVPSE 588 | Cheliferidae | <i>Hysterochelifer cyprius</i> | 9 | 2017 | June     | 19 | Soreq Nature Reserve            | Judea           | 31.36 | 35.08 | Opiliones curse  |
| HUJINVPSE 663 | Cheliferidae | <i>Hysterochelifer</i>         | 1 | 2017 | June     | 19 | Upper Soreq                     | Judea           | 31.76 | 35.07 |                  |

|               |              |                                      |   |      |           |    |                                                        |                             |       |       |                                      |
|---------------|--------------|--------------------------------------|---|------|-----------|----|--------------------------------------------------------|-----------------------------|-------|-------|--------------------------------------|
| HUJINVPSE 406 | Cheliferidae | <i>Hysterochelifer cyprius</i>       | 1 | 1972 | June      | 2  | Nature Reserve<br>5km S. of Mass'ada,<br>Golan Heights | Golan                       | 33.23 | 35.75 | Tintpulver<br>M. T.                  |
| HUJINVPSE 503 | Cheliferidae | <i>Hysterochelifer cyprius</i>       | 1 | 1974 | July      | 19 | Bab el-Hawa grove,<br>Golan Heights                    | Golan<br>Heights            | 33.15 | 35.78 | Faunistics                           |
| HUJINVPSE 537 | Cheliferidae | <i>Hysterochelifer cyprius</i>       | 2 | 1978 | July      | 3  | Zivan                                                  | Golan                       | 33.11 | 35.79 | Levy G. L.                           |
| HUJINVPSE 579 | Cheliferidae | <i>Hysterochelifer cyprius</i>       | 1 | 2017 | June      | 12 | Odem forest                                            | Golan                       | 33.23 | 35.75 | Opiliones<br>curse                   |
| HUJINVPSE 37  | Cheliferidae | <i>Hysterochelifer cyprius</i>       | 4 |      |           |    |                                                        |                             |       |       |                                      |
| HUJINVPSE 685 | Cheliferidae | <i>Hysterochelifer cyprius</i>       | 1 |      |           |    |                                                        |                             |       |       | Steinitz H.<br>S.                    |
| HUJINVPSE 768 | Cheliferidae | <i>Hysterochelifer distinguendus</i> | 1 | 2021 | November  | 5  | Hazan Hills,<br>Amatzia                                | Shfelat<br>Yehudah          | 31.52 | 34.91 | Pinchevsky<br>D.                     |
| HUJINVPSE 769 | Cheliferidae | <i>Hysterochelifer distinguendus</i> | 3 | 2021 | September | 21 | Hazan Hills,<br>Amatzia                                | Shfelat<br>Yehudah          | 31.52 | 34.91 | Pinchevsky<br>D.                     |
| HUJINVPSE 772 | Cheliferidae | <i>Hysterochelifer distinguendus</i> | 1 | 2021 | September | 30 | Hazan Hills,<br>Amatzia                                | Shfelat<br>Yehudah          | 31.52 | 34.91 | Pinchevsky<br>D.                     |
| HUJINVPSE 773 | Cheliferidae | <i>Hysterochelifer distinguendus</i> | 1 | 2021 | September | 30 | Hazan Hills,<br>Amatzia                                | Shfelat<br>Yehudah          | 31.52 | 34.91 | Pinchevsky<br>D.                     |
| HUJINVPSE 781 | Cheliferidae | <i>Hysterochelifer distinguendus</i> | 1 | 2022 | January   | 11 | Hazan Hills,<br>Amatzia                                | Shfelat<br>Yehudah          | 31.52 | 34.91 | Pinchevsky<br>D.                     |
| HUJINVPSE 843 | Cheliferidae | <i>Hysterochelifer distinguendus</i> | 1 | 2022 | March     | 6  | Hazan Hills,<br>Amatzia                                | Shfelat<br>Yehudah          | 31.52 | 34.91 | Pinchevsky<br>D.                     |
| HUJINVPSE 844 | Cheliferidae | <i>Hysterochelifer distinguendus</i> | 3 | 2022 | May       | 30 | Jerusalem Emek<br>HaMazleva                            | Judea                       | 31.77 | 35.21 | Arachnid<br>course                   |
| HUJINVPSE 695 | Cheliferidae | <i>Hysterochelifer tuberculatus</i>  | 6 | 2018 | August    | 24 | Beith Jan                                              | Upper<br>Galilee            | 32.97 | 35.39 | Aharon S.                            |
| HUJINVPSE 929 | Cheliferidae | <i>Hysterochelifer tuberculatus</i>  | 1 | 2022 | October   | 22 | Snir                                                   | Galilee                     | 33.24 | 35.68 | Chipman<br>A.D.,<br>Edgecomb<br>G.D. |
| HUJINVPSE 860 | Cheliferidae | <i>Hysterochelifer tuberculatus</i>  | 2 | 2022 | June      | 22 | Einot Kishyon,<br>Nahal Tavor                          | Lower<br>Galilee            | 32.71 | 35.1  | Shacham B.                           |
| HUJINVPSE 35  | Cheliferidae | <i>Hysterochelifer tuberculatus</i>  | 3 | 1944 | December  | 3  | Mishmar Ha'emek                                        | Jezreel<br>Valley           | 32.61 | 35.14 | Shulov A.                            |
| HUJINVPSE 38  | Cheliferidae | <i>Hysterochelifer tuberculatus</i>  | 1 | 1949 | December  | 3  | Mishmar Ha'emek                                        | Jezreel<br>Valley           | 32.61 | 35.14 | Shulov A.                            |
| HUJINVPSE 54  | Cheliferidae | <i>Hysterochelifer tuberculatus</i>  | 1 | 1945 | February  | 22 | Natania                                                | Coastal<br>plain-<br>Center | 32.29 | 34.84 |                                      |
| HUJINVPSE 500 | Cheliferidae | <i>Hysterochelifer tuberculatus</i>  | 1 | 1972 | February  | 14 | Sidni Ali                                              | Coastal<br>plain-<br>Center | 32.19 | 34.81 | Tsabar G.<br>T.                      |
| HUJINVPSE 334 | Cheliferidae | <i>Hysterochelifer tuberculatus</i>  | 1 | 1964 | November  | 12 | Bet Gimal                                              | Shfelat<br>Yehudah          | 31.72 | 34.98 | Levy G. L.                           |
| HUJINVPSE 675 | Cheliferidae | <i>Hysterochelifer tuberculatus</i>  | 3 | 2002 | March     | 22 | Adulam Reserve                                         | Judea                       | 31.64 | 34.94 | Mandelik<br>Y. M.                    |
| HUJINVPSE 722 | Cheliferidae | <i>Hysterochelifer tuberculatus</i>  | 3 | 2020 | Feb       | 16 | Haruva cave                                            | Judea                       | 31.91 | 34.96 | EGR                                  |
| HUJINVPSE 921 | Cheliferidae | <i>Hysterochelifer tuberculatus</i>  | 5 | 2022 | August    | 11 | Tel Sokho                                              | Shfelat<br>Yehudah          | 31.68 | 34.97 | SK,EGR,<br>BK, PPS,<br>GG, HS        |
| HUJINVPSE 927 | Cheliferidae | <i>Hysterochelifer tuberculatus</i>  | 1 | 2022 | August    | 16 | Nahal Socho                                            | Shfelat<br>Yehudah          | 31.63 | 34.97 | EGR, PPS,<br>GG                      |
| HUJINVPSE 59  | Cheliferidae | <i>Hysterochelifer tuberculatus</i>  | 1 | 1937 | February  | 18 | Jerusalem                                              | Judea                       | 31.77 | 35.21 | Shulov A.                            |
| HUJINVPSE 359 | Cheliferidae | <i>Hysterochelifer tuberculatus</i>  | 1 | 1938 | January   | 15 | Jerusalem                                              | Judea                       | 31.77 | 35.21 |                                      |

|               |              |                                     |   |      |          |    |                                       |               |       |       |                      |
|---------------|--------------|-------------------------------------|---|------|----------|----|---------------------------------------|---------------|-------|-------|----------------------|
| HUJINVPSE 45  | Cheliferidae | <i>Hysterochelifer tuberculatus</i> | 1 | 1943 | November | 6  | Beth- Sekaria, Gus Ezion              | Judea         | 31.66 | 35.12 |                      |
| HUJINVPSE 46  | Cheliferidae | <i>Hysterochelifer tuberculatus</i> | 1 | 1947 | April    | 13 | Jerusalem                             | Judea         | 31.77 | 35.21 | Shulov A.            |
| HUJINVPSE 34  | Cheliferidae | <i>Hysterochelifer tuberculatus</i> | 1 | 1954 | December | 6  | Jerusalem                             | Judea         | 31.77 | 35.21 |                      |
| HUJINVPSE 39  | Cheliferidae | <i>Hysterochelifer tuberculatus</i> | 1 | 1954 | December | 6  | Jerusalem                             | Judea         | 31.77 | 35.21 |                      |
| HUJINVPSE 51  | Cheliferidae | <i>Hysterochelifer tuberculatus</i> | 1 | 1954 | July     | 6  | Jerusalem                             | Judea         | 31.77 | 35.21 |                      |
| HUJINVPSE 53  | Cheliferidae | <i>Hysterochelifer tuberculatus</i> | 1 | 1954 | December | 15 | Jerusalem                             | Judea         | 31.77 | 35.21 |                      |
| HUJINVPSE 56  | Cheliferidae | <i>Hysterochelifer tuberculatus</i> | 1 | 1954 | December | 6  | Jerusalem                             | Judea         | 31.77 | 35.21 |                      |
| HUJINVPSE 40  | Cheliferidae | <i>Hysterochelifer tuberculatus</i> | 1 | 1961 | April    | 22 | Hirbat Sa'adim, (Khirbat Saida)       | Judea         | 31.75 | 35.13 | Ackstein             |
| HUJINVPSE 480 | Cheliferidae | <i>Hysterochelifer tuberculatus</i> | 1 | 1973 | May      | 3  | Jerusalem                             | Judea         | 31.77 | 35.21 | Tsabar G. T.         |
| HUJINVPSE 590 | Cheliferidae | <i>Hysterochelifer tuberculatus</i> | 1 | 2017 | June     | 19 | Hirbat Sa'adim                        | Judea         | 31.75 | 35.13 | Opiliones course     |
| HUJINVPSE 749 | Cheliferidae | <i>Hysterochelifer tuberculatus</i> | 1 | 2022 | February | 27 | Jerusalem Givat Ram botanical gardens | Judea         | 31.77 | 35.2  | D.Harms course       |
| HUJINVPSE 750 | Cheliferidae | <i>Hysterochelifer tuberculatus</i> | 1 | 2022 | February | 27 | Jerusalem Givat Ram botanical gardens | Judea         | 31.77 | 35.2  | D.Harms course       |
| HUJINVPSE 758 | Cheliferidae | <i>Hysterochelifer tuberculatus</i> | 1 | 2022 | February | 27 | Jerusalem Givat Ram botanical gardens | Judea         | 31.77 | 35.2  | D.Harms course       |
| HUJINVPSE 761 | Cheliferidae | <i>Hysterochelifer tuberculatus</i> | 1 | 2022 | February | 27 | Jerusalem Givat Ram botanical gardens | Judea         | 31.77 | 35.2  | D.Harms course       |
| HUJINVPSE 762 | Cheliferidae | <i>Hysterochelifer tuberculatus</i> | 1 | 2022 | February | 27 | Jerusalem Givat Ram botanical gardens | Judea         | 31.77 | 35.2  | D.Harms course       |
| HUJINVPSE 766 | Cheliferidae | <i>Hysterochelifer tuberculatus</i> | 2 | 2022 | February | 26 | Jerusalem Givat Ram botanical gardens | Judea         | 31.77 | 35.2  | D.Harms course       |
| HUJINVPSE 811 | Cheliferidae | <i>Hysterochelifer tuberculatus</i> | 1 | 2022 | March    | 28 | Jerusalem Givat Ram botanical gardens | Judea         | 31.77 | 35.2  | EGR arachnid course  |
| HUJINVPSE 812 | Cheliferidae | <i>Hysterochelifer tuberculatus</i> | 1 | 2022 | March    | 28 | Jerusalem Givat Ram botanical gardens | Judea         | 31.77 | 35.2  | EGR arachnid course  |
| HUJINVPSE 751 | Cheliferidae | <i>Hysterochelifer tuberculatus</i> | 1 | 2022 | February | 27 | Jerusalem Givat Ram botanical gardens | Judea         | 31.77 | 35.2  | D.Harms course       |
| HUJINVPSE 894 | Cheliferidae | <i>Hysterochelifer</i>              | 1 | 2022 | June     | 30 | Mt. Meiron-Humema                     | Upper Galilee | 33.01 | 35.4  | M. Finkel , Y. Goren |
| HUJINVPSE 895 | Cheliferidae | <i>Hysterochelifer</i>              | 1 | 2022 | June     | 30 | Mt. Meiron-Humema                     | Upper Galilee | 33.01 | 35.4  | M. Finkel , Y. Goren |
| HUJINVPSE 57  | Cheliferidae | <i>Hysterochelifer</i>              | 1 | 1938 | May      |    | Jerusalem                             | Judea         | 31.77 | 35.21 | Shulov A.            |
| HUJINVPSE 867 | Cheliferidae | <i>Rachochelifer</i>                | 1 | 2022 | May      | 19 | Mt. Meiron-Humema                     | Upper Galilee | 33.01 | 35.4  | M. Finkel , Y. Goren |
| HUJINVPSE 883 | Cheliferidae | <i>Rachochelifer</i>                | 1 | 2022 | May      | 9  | Mt. Meiron-Humema                     | Upper Galilee | 33.01 | 35.4  | M. Finkel , Y. Goren |
| HUJINVPSE 899 | Cheliferidae | <i>Rachochelifer</i>                | 1 | 2022 | June     | 20 | Mt. Meiron-Hurfeish                   | Upper Galilee | 33.02 | 35.33 | M. Finkel , Y. Goren |
| HUJINVPSE 765 | Cheliferidae | <i>Rhacochelifer</i>                | 1 | 2022 | March    | 4  | Nahal Alexander                       | Emek Hefer    | 32.39 | 34.89 | Ganem Z.             |
| HUJINVPSE 297 | Cheliferidae | <i>Rhacochelifer</i>                | 9 | 1962 | January  | 10 | Wadi Rubin (Nahal                     | Judea         | 31.94 | 34.72 | Amitai P.            |

|               |              |                                              |   |      |               |    |                                      |                                           |       |       |                                                                  |
|---------------|--------------|----------------------------------------------|---|------|---------------|----|--------------------------------------|-------------------------------------------|-------|-------|------------------------------------------------------------------|
| HUJINVPSE 771 | Cheliferidae | <i>Rhacochelifer</i>                         | 1 | 2021 | September     | 30 | Soreq)<br>Hazan Hills,<br>Amatzia    | Shfelat<br>Yehudah                        | 31.52 | 34.91 | A.<br>Pinchevsky<br>D.<br>EGR,<br>Daniel<br>Alfred,<br>Aharon S. |
| HUJINVPSE 934 | Cheliferidae | <i>Rhacochelifer</i>                         | 1 | 2022 | October       | 27 | Tel Sokho                            | Shfelat<br>Yehudah                        | 31.68 | 34.97 |                                                                  |
| HUJINVPSE 58  | Cheliferidae | <i>Rhacochelifer</i>                         | 1 |      | September     | 24 | Chanitah                             | Galilee -<br>Upper<br>Western<br>Northern | 33.09 | 35.17 |                                                                  |
| HUJINVPSE 704 | Cheliferidae | <i>Rhacochelifer<br/>corcyrensis bicolor</i> | 1 | 1944 | September     | 8  | Atlit                                | coastal<br>Plain<br>Northern              | 32.71 | 34.94 |                                                                  |
| HUJINVPSE 310 | Cheliferidae | <i>Rhacochelifer<br/>corcyrensis bicolor</i> | 1 | 1964 | May           | 14 | Rosh HaNikra                         | coastal<br>Plain<br>Jordan                | 33.09 | 35.11 | Amitai P.<br>A.                                                  |
| HUJINVPSE 891 | Cheliferidae | <i>Rhacochelifer<br/>corcyrensis bicolor</i> | 4 | 1967 | May           | 8  | Hamadyia Jordan<br>Valley            | Jordan<br>Valley                          | 32.53 | 35.54 | Costa M. C.                                                      |
| HUJINVPSE 487 | Cheliferidae | <i>Rhacochelifer<br/>corcyrensis bicolor</i> | 1 | 1978 | July          | 2  | Bi'qat Btecha (N.<br>Kinneret)       | Galil                                     | 32.88 | 35.64 | Levy G. L.                                                       |
| HUJINVPSE 485 | Cheliferidae | <i>Rhacochelifer<br/>corcyrensis bicolor</i> | 1 | 1979 | June          | 24 | Bi'qat Btecha (N.<br>Kinneret)       | Galil                                     | 32.88 | 35.64 | Levy G. L.                                                       |
| HUJINVPSE 385 | Cheliferidae | <i>Rhacochelifer<br/>corcyrensis bicolor</i> | 1 | 1939 | March         | 8  | Avichail                             | Coastal<br>plain-<br>Center               | 32.35 | 34.87 |                                                                  |
| HUJINVPSE 5   | Cheliferidae | <i>Rhacochelifer<br/>corcyrensis bicolor</i> | 1 | 1944 | March         | 16 | Kfar Mallal                          | Coastal<br>plain-<br>Center               | 32.17 | 34.89 | Moskona                                                          |
| HUJINVPSE 2   | Cheliferidae | <i>Rhacochelifer<br/>corcyrensis bicolor</i> | 1 | 1961 | May           | 26 | Ashqelon, Hamama<br>marshes          | Coastal<br>Plain -<br>Southern            | 31.67 | 34.55 | Ritte U. R.                                                      |
| HUJINVPSE 664 | Cheliferidae | <i>Rhacochelifer<br/>corcyrensis bicolor</i> | 1 | 2018 | February      | 19 | TA university<br>botanical gardens   | central<br>coastal<br>plain               | 32.11 | 34.81 |                                                                  |
| HUJINVPSE 600 | Cheliferidae | <i>Rhacochelifer<br/>corcyrensis bicolor</i> | 1 | 2021 | May           | 22 | Yarkon                               | Coastal<br>plain-<br>Center               | 32.1  | 34.79 | Sinaiko G.                                                       |
| HUJINVPSE 388 | Cheliferidae | <i>Rhacochelifer<br/>corcyrensis bicolor</i> | 1 |      | June          |    | Jerusalem                            | Judea                                     | 31.77 | 35.21 |                                                                  |
| HUJINVPSE 321 | Cheliferidae | <i>Rhacochelifer<br/>corcyrensis bicolor</i> | 1 | 1969 | May           | 5  | En E'Tureba                          | Judea                                     | 31.61 | 35.41 | Levy G. L.                                                       |
| HUJINVPSE 1   | Cheliferidae | <i>Rhacochelifer<br/>corcyrensis bicolor</i> | 1 | 1944 | March         | 16 | Bet-HaArava, Near,<br>Bank Of Jordan | Dead Sea                                  | 31.8  | 35.5  |                                                                  |
| HUJINVPSE 8   | Cheliferidae | <i>Rhacochelifer<br/>corcyrensis bicolor</i> | 1 | 1944 | March         | 16 | Bet-HaArava, Near,<br>Bank Of Jordan | Dead Sea                                  | 31.8  | 35.5  | Steinitz                                                         |
| HUJINVPSE 9   | Cheliferidae | <i>Rhacochelifer<br/>corcyrensis bicolor</i> | 1 | 1946 | March         | 28 | Bet-HaArava,                         | Dead Sea                                  | 31.8  | 35.5  | Shulov A.                                                        |
| HUJINVPSE 6   | Cheliferidae | <i>Rhacochelifer<br/>corcyrensis bicolor</i> | 1 | 1947 | August        | 16 | En Gedi                              | Dead Sea                                  | 31.47 | 35.39 | Wahrman J.                                                       |
| HUJINVPSE 7   | Cheliferidae | <i>Rhacochelifer<br/>corcyrensis bicolor</i> | 1 | 1961 | May           | 6  | En Gedi                              | Dead Sea                                  | 31.47 | 35.39 | Wahrman J.                                                       |
| HUJINVPSE 630 | Cheliferidae | <i>Rhacochelifer<br/>corcyrensis bicolor</i> | 1 | 2016 | 4Sep-<br>5Oct |    | Avrona                               | Arava                                     | 29.67 | 35.01 |                                                                  |
| HUJINVPSE 631 | Cheliferidae | <i>Rhacochelifer<br/>corcyrensis bicolor</i> | 3 | 2016 | 4Sep-<br>5Oct |    | Avrona                               | Arava                                     | 29.67 | 35.01 |                                                                  |
| HUJINVPSE 632 | Cheliferidae | <i>Rhacochelifer<br/>corcyrensis bicolor</i> | 1 | 2016 | 4Sep-<br>5Oct |    | Avrona                               | Arava                                     | 29.67 | 35.01 |                                                                  |
| HUJINVPSE 633 | Cheliferidae | <i>Rhacochelifer<br/>corcyrensis bicolor</i> | 1 | 2016 | 4Sep-<br>5Oct |    | Avrona                               | Arava                                     | 29.67 | 35.01 |                                                                  |
| HUJINVPSE 635 | Cheliferidae | <i>Rhacochelifer</i>                         | 1 | 2016 | 4Sep-         |    | Avrona                               | Arava                                     | 29.67 | 35.01 |                                                                  |

|               |              |                                                    |   |      |                       |    |        |       |       |       |             |
|---------------|--------------|----------------------------------------------------|---|------|-----------------------|----|--------|-------|-------|-------|-------------|
| HUJINVPSE 636 | Cheliferidae | <i>corcyrensis bicolor</i><br><i>Rhacochelifer</i> | 1 | 2016 | 5Oct<br>4Sep-<br>5Oct |    | Avrona | Arava | 29.67 | 35.01 |             |
| HUJINVPSE 794 | Cheliferidae | <i>corcyrensis bicolor</i><br><i>Rhacochelifer</i> | 3 | 2016 | May                   |    | Avrona | Arava | 29.67 | 35.01 | M. Ferrante |
| HUJINVPSE 797 | Cheliferidae | <i>corcyrensis bicolor</i><br><i>Rhacochelifer</i> | 1 | 2016 | April                 | 19 | Avrona | Arava | 29.67 | 35.01 |             |
| HUJINVPSE 800 | Cheliferidae | <i>corcyrensis bicolor</i><br><i>Rhacochelifer</i> | 1 | 2016 | May                   | 19 | Avrona | Arava | 29.67 | 35.01 |             |
| HUJINVPSE 803 | Cheliferidae | <i>corcyrensis bicolor</i><br><i>Rhacochelifer</i> | 1 | 2016 | May                   | 19 | Avrona | Arava | 29.67 | 35.01 |             |
| HUJINVPSE 804 | Cheliferidae | <i>corcyrensis bicolor</i><br><i>Rhacochelifer</i> | 1 | 2016 | May                   | 19 | Avrona | Arava | 29.67 | 35.01 |             |
| HUJINVPSE 615 | Cheliferidae | <i>corcyrensis bicolor</i><br><i>Rhacochelifer</i> | 1 | 2017 | May                   |    | Avrona | Arava | 29.67 | 35.01 |             |
| HUJINVPSE 616 | Cheliferidae | <i>corcyrensis bicolor</i><br><i>Rhacochelifer</i> | 1 | 2017 | Septembe<br>r         |    | Avrona | Arava | 29.67 | 35.01 |             |
| HUJINVPSE 620 | Cheliferidae | <i>corcyrensis bicolor</i><br><i>Rhacochelifer</i> | 1 | 2017 | May                   |    | Avrona | Arava | 29.67 | 35.01 |             |
| HUJINVPSE 622 | Cheliferidae | <i>corcyrensis bicolor</i><br><i>Rhacochelifer</i> | 2 | 2017 | May                   |    | Avrona | Arava | 29.67 | 35.01 |             |
| HUJINVPSE 624 | Cheliferidae | <i>corcyrensis bicolor</i><br><i>Rhacochelifer</i> | 1 | 2017 | Septembe<br>r         |    | Avrona | Arava | 29.67 | 35.01 |             |
| HUJINVPSE 626 | Cheliferidae | <i>corcyrensis bicolor</i><br><i>Rhacochelifer</i> | 1 | 2017 | May                   |    | Avrona | Arava | 29.67 | 35.01 |             |
| HUJINVPSE 627 | Cheliferidae | <i>corcyrensis bicolor</i><br><i>Rhacochelifer</i> | 1 | 2017 | May                   |    | Avrona | Arava | 29.67 | 35.01 |             |
| HUJINVPSE 628 | Cheliferidae | <i>corcyrensis bicolor</i><br><i>Rhacochelifer</i> | 1 | 2017 | May                   |    | Avrona | Arava | 29.67 | 35.01 |             |
| HUJINVPSE 637 | Cheliferidae | <i>corcyrensis bicolor</i><br><i>Rhacochelifer</i> | 1 | 2017 | Septembe<br>r         |    | Avrona | Arava | 29.67 | 35.01 |             |
| HUJINVPSE 638 | Cheliferidae | <i>corcyrensis bicolor</i><br><i>Rhacochelifer</i> | 1 | 2017 | Septembe<br>r         |    | Avrona | Arava | 29.67 | 35.01 |             |
| HUJINVPSE 639 | Cheliferidae | <i>corcyrensis bicolor</i><br><i>Rhacochelifer</i> | 8 | 2017 | May                   |    | Avrona | Arava | 29.67 | 35.01 |             |
| HUJINVPSE 640 | Cheliferidae | <i>corcyrensis bicolor</i><br><i>Rhacochelifer</i> | 1 | 2017 | May                   |    | Avrona | Arava | 29.67 | 35.01 |             |
| HUJINVPSE 641 | Cheliferidae | <i>corcyrensis bicolor</i><br><i>Rhacochelifer</i> | 2 | 2017 | May                   |    | Avrona | Arava | 29.67 | 35.01 |             |
| HUJINVPSE 642 | Cheliferidae | <i>corcyrensis bicolor</i><br><i>Rhacochelifer</i> | 3 | 2017 | May                   |    | Avrona | Arava | 29.67 | 35.01 |             |
| HUJINVPSE 643 | Cheliferidae | <i>corcyrensis bicolor</i><br><i>Rhacochelifer</i> | 2 | 2017 | May                   |    | Avrona | Arava | 29.67 | 35.01 |             |
| HUJINVPSE 644 | Cheliferidae | <i>corcyrensis bicolor</i><br><i>Rhacochelifer</i> | 2 | 2017 | Septembe<br>r         |    | Avrona | Arava | 29.67 | 35.01 |             |
| HUJINVPSE 646 | Cheliferidae | <i>corcyrensis bicolor</i><br><i>Rhacochelifer</i> | 1 | 2017 | May                   |    | Avrona | Arava | 29.67 | 35.01 |             |
| HUJINVPSE 647 | Cheliferidae | <i>corcyrensis bicolor</i><br><i>Rhacochelifer</i> | 1 | 2017 | May                   |    | Avrona | Arava | 29.67 | 35.01 |             |
| HUJINVPSE 648 | Cheliferidae | <i>corcyrensis bicolor</i><br><i>Rhacochelifer</i> | 1 | 2017 | May                   |    | Avrona | Arava | 29.67 | 35.01 |             |
| HUJINVPSE 649 | Cheliferidae | <i>corcyrensis bicolor</i><br><i>Rhacochelifer</i> | 2 | 2017 | May                   |    | Avrona | Arava | 29.67 | 35.01 |             |
| HUJINVPSE 667 | Cheliferidae | <i>corcyrensis bicolor</i><br><i>Rhacochelifer</i> | 1 | 2017 | May                   |    | Avrona | Arava | 29.67 | 35.01 |             |
| HUJINVPSE 668 | Cheliferidae | <i>corcyrensis bicolor</i><br><i>Rhacochelifer</i> | 1 | 2017 | May                   |    | Avrona | Arava | 29.67 | 35.01 |             |
| HUJINVPSE 799 | Cheliferidae | <i>corcyrensis bicolor</i><br><i>Rhacochelifer</i> | 1 | 2017 | Septembe<br>r         |    | Avrona | Arava | 29.67 | 35.01 |             |
| HUJINVPSE 901 | Cheliferidae | <i>Rhacochelifer</i>                               | 2 | 2018 | Septembe              |    | Avrona | Arava | 29.67 | 35.01 |             |



|               |              |                                          |    |      |            |        |       |       |       |             |  |  |
|---------------|--------------|------------------------------------------|----|------|------------|--------|-------|-------|-------|-------------|--|--|
|               |              | <i>corcyrensis bicolor</i>               |    |      | r          |        |       |       |       |             |  |  |
| HUJINVPSE 902 | Cheliferidae | <i>Rhacochelifer corcyrensis bicolor</i> | 1  | 2018 | May        | Avrona | Arava | 29.67 | 35.01 |             |  |  |
| HUJINVPSE 903 | Cheliferidae | <i>Rhacochelifer corcyrensis bicolor</i> | 11 | 2018 | September  | Avrona | Arava | 29.67 | 35.01 |             |  |  |
| HUJINVPSE 904 | Cheliferidae | <i>Rhacochelifer corcyrensis bicolor</i> | 3  | 2018 | September  | Avrona | Arava | 29.67 | 35.01 |             |  |  |
| HUJINVPSE 905 | Cheliferidae | <i>Rhacochelifer corcyrensis bicolor</i> | 1  | 2018 | May        | Avrona | Arava | 29.67 | 35.01 |             |  |  |
| HUJINVPSE 906 | Cheliferidae | <i>Rhacochelifer corcyrensis bicolor</i> | 1  | 2018 | May        | Avrona | Arava | 29.67 | 35.01 |             |  |  |
| HUJINVPSE 907 | Cheliferidae | <i>Rhacochelifer corcyrensis bicolor</i> | 1  | 2018 | May        | Avrona | Arava | 29.67 | 35.01 |             |  |  |
| HUJINVPSE 908 | Cheliferidae | <i>Rhacochelifer corcyrensis bicolor</i> | 1  | 2018 | September  | Avrona | Arava | 29.67 | 35.01 |             |  |  |
| HUJINVPSE 909 | Cheliferidae | <i>Rhacochelifer corcyrensis bicolor</i> | 3  | 2018 | September  | Avrona | Arava | 29.67 | 35.01 |             |  |  |
| HUJINVPSE 910 | Cheliferidae | <i>Rhacochelifer corcyrensis bicolor</i> | 1  | 2018 | September  | Avrona | Arava | 29.67 | 35.01 |             |  |  |
| HUJINVPSE 911 | Cheliferidae | <i>Rhacochelifer corcyrensis bicolor</i> | 1  | 2018 | September  | Avrona | Arava | 29.67 | 35.01 |             |  |  |
| HUJINVPSE 912 | Cheliferidae | <i>Rhacochelifer corcyrensis bicolor</i> | 1  | 2018 | September  | Avrona | Arava | 29.67 | 35.01 |             |  |  |
| HUJINVPSE 913 | Cheliferidae | <i>Rhacochelifer corcyrensis bicolor</i> | 1  | 2018 | September  | Avrona | Arava | 29.67 | 35.01 |             |  |  |
| HUJINVPSE 914 | Cheliferidae | <i>Rhacochelifer corcyrensis bicolor</i> | 1  | 2018 | September  | Avrona | Arava | 29.67 | 35.01 |             |  |  |
| HUJINVPSE 602 | Cheliferidae | <i>Rhacochelifer corcyrensis bicolor</i> | 1  | 2019 | Feb-March  | Avrona | Arava | 29.67 | 35.01 | M. Ferrante |  |  |
| HUJINVPSE 603 | Cheliferidae | <i>Rhacochelifer corcyrensis bicolor</i> | 1  | 2019 | May-June   | Avrona | Arava | 29.67 | 35.01 | M. Ferrante |  |  |
| HUJINVPSE 604 | Cheliferidae | <i>Rhacochelifer corcyrensis bicolor</i> | 1  | 2019 | May-June   | Avrona | Arava | 29.67 | 35.01 | M. Ferrante |  |  |
| HUJINVPSE 605 | Cheliferidae | <i>Rhacochelifer corcyrensis bicolor</i> | 2  | 2019 | May-June   | Avrona | Arava | 29.67 | 35.01 | M. Ferrante |  |  |
| HUJINVPSE 606 | Cheliferidae | <i>Rhacochelifer corcyrensis bicolor</i> | 2  | 2019 | May-June   | Avrona | Arava | 29.67 | 35.01 | M. Ferrante |  |  |
| HUJINVPSE 607 | Cheliferidae | <i>Rhacochelifer corcyrensis bicolor</i> | 2  | 2019 | May-June   | Avrona | Arava | 29.67 | 35.01 | M. Ferrante |  |  |
| HUJINVPSE 608 | Cheliferidae | <i>Rhacochelifer corcyrensis bicolor</i> | 1  | 2019 | Feb-March  | Avrona | Arava | 29.67 | 35.01 | M. Ferrante |  |  |
| HUJINVPSE 609 | Cheliferidae | <i>Rhacochelifer corcyrensis bicolor</i> | 2  | 2019 | May-June   | Avrona | Arava | 29.67 | 35.01 | M. Ferrante |  |  |
| HUJINVPSE 610 | Cheliferidae | <i>Rhacochelifer corcyrensis bicolor</i> | 3  | 2019 | May-June   | Avrona | Arava | 29.67 | 35.01 | M. Ferrante |  |  |
| HUJINVPSE 611 | Cheliferidae | <i>Rhacochelifer corcyrensis bicolor</i> | 1  | 2019 | May-June   | Avrona | Arava | 29.67 | 35.01 | M. Ferrante |  |  |
| HUJINVPSE 612 | Cheliferidae | <i>Rhacochelifer corcyrensis bicolor</i> | 1  | 2019 | Feb-March  | Avrona | Arava | 29.67 | 35.01 | M. Ferrante |  |  |
| HUJINVPSE 613 | Cheliferidae | <i>Rhacochelifer corcyrensis bicolor</i> | 11 | 2019 | 3Jun-21Jul | Avrona | Arava | 29.67 | 35.01 | M. Ferrante |  |  |
| HUJINVPSE 614 | Cheliferidae | <i>Rhacochelifer corcyrensis bicolor</i> | 11 | 2019 | May-June   | Avrona | Arava | 29.67 | 35.01 | M. Ferrante |  |  |
| HUJINVPSE 713 | Cheliferidae | <i>Rhacochelifer corcyrensis bicolor</i> | 3  | 2019 | Feb-March  | Avrona | Arava | 29.67 | 35.01 | M. Ferrante |  |  |
| HUJINVPSE 714 | Cheliferidae | <i>Rhacochelifer corcyrensis bicolor</i> | 1  | 2019 | Feb-March  | Avrona | Arava | 29.67 | 35.01 | M. Ferrante |  |  |
| HUJINVPSE 735 | Cheliferidae | <i>Rhacochelifer corcyrensis bicolor</i> | 1  | 2019 | Feb-March  | Avrona | Arava | 29.67 | 35.01 | M. Ferrante |  |  |
| HUJINVPSE 736 | Cheliferidae | <i>Rhacochelifer</i>                     | 1  | 2019 | Feb-       | Avrona | Arava | 29.67 | 35.01 | M. Ferrante |  |  |

|               |              |                                                    |   |      |                        |       |                                       |                               |       |       |                   |
|---------------|--------------|----------------------------------------------------|---|------|------------------------|-------|---------------------------------------|-------------------------------|-------|-------|-------------------|
| HUJINVPSE 737 | Cheliferidae | <i>corcyrensis bicolor</i><br><i>Rhacochelifer</i> | 1 | 2019 | March<br>Feb-<br>March |       | Avrona                                | Arava                         | 29.67 | 35.01 | M. Ferrante       |
| HUJINVPSE 798 | Cheliferidae | <i>corcyrensis bicolor</i><br><i>Rhacochelifer</i> | 2 |      |                        |       | Avrona                                | Arava                         | 29.67 | 35.01 |                   |
| HUJINVPSE 801 | Cheliferidae | <i>corcyrensis bicolor</i><br><i>Rhacochelifer</i> | 1 |      |                        |       | Avrona                                | Arava                         | 29.67 | 35.01 |                   |
| HUJINVPSE 805 | Cheliferidae | <i>corcyrensis bicolor</i><br><i>Rhacochelifer</i> | 1 |      |                        |       | Avrona                                | Arava                         | 29.67 | 35.01 |                   |
| HUJINVPSE 465 | Cheliferidae | <i>corcyrensis bicolor</i><br><i>Rhacochelifer</i> | 1 | 1969 | July                   | 15    | Paran plain near<br>border with Egypt | Negev                         | 30.06 | 34.74 | Motka<br>Avrahami |
| HUJINVPSE 302 | Cheliferidae | <i>corcyrensis bicolor</i><br><i>Rhacochelifer</i> | 1 | 1939 | August                 | 14    | Wadi Arur                             |                               |       |       |                   |
| HUJINVPSE 617 | Cheliferidae | <i>corcyrensis bicolor</i><br><i>Rhacochelifer</i> | 1 | 2017 | September              | 12,13 | Avrona                                | Arava                         | 29.67 | 35.01 |                   |
| HUJINVPSE 619 | Cheliferidae | <i>corcyrensis bicolor</i><br><i>Rhacochelifer</i> | 1 | 2017 | September              | 12,14 | Avrona                                | Arava                         | 29.67 | 35.01 |                   |
| HUJINVPSE 623 | Cheliferidae | <i>corcyrensis bicolor</i><br><i>Rhacochelifer</i> | 2 | 2017 | September              | 11,12 | Avrona                                | Arava                         | 29.67 | 35.01 |                   |
| HUJINVPSE 645 | Cheliferidae | <i>corcyrensis bicolor</i><br><i>Rhacochelifer</i> | 1 | 2017 | May                    |       | Avrona                                | Arava                         | 29.67 | 35.01 |                   |
| HUJINVPSE 52  | Cheliferidae | <i>Rhacochelifer</i>                               | 4 | 1940 | August                 | 18    | Hula                                  | Galilee -<br>Eastern<br>Hula  | 33.07 | 35.6  |                   |
| HUJINVPSE 3   | Cheliferidae | <i>Rhacochelifer lobipes</i>                       | 1 | 1946 | April                  | 12    | Daphna                                | Galilee -<br>Upper<br>Eastern | 33.24 | 35.64 | Shulov A.         |
| HUJINVPSE 543 | Cheliferidae | <i>Rhacochelifer</i><br><i>longeunguiculatus</i>   | 1 | 1961 | June                   | 19    | Meron                                 | Galil                         | 32.99 | 35.41 | Wahrman J.<br>W.  |
| HUJINVPSE 236 | Cheliferidae | <i>Rhacochelifer</i><br><i>longeunguiculatus</i>   | 3 | 1944 | August                 | 27    | Bet Oren                              | Carmel                        | 32.73 | 35.01 | Steinitz H.<br>S. |
| HUJINVPSE 257 | Cheliferidae | <i>Rhacochelifer</i><br><i>longeunguiculatus</i>   | 1 | 1961 | May                    | 14    | Rosh HaNikra                          | Northern<br>coastal<br>Plain  | 33.09 | 35.12 | Amitai P.<br>A.   |
| HUJINVPSE 383 | Cheliferidae | <i>Rhacochelifer</i><br><i>longeunguiculatus</i>   | 1 | 1961 | May                    | 14    | Rosh Ha'nikra                         | Northern<br>Coastal<br>Plain  | 33.09 | 35.12 | Amitai P.<br>A.   |
| HUJINVPSE 535 | Cheliferidae | <i>Rhacochelifer</i><br><i>longeunguiculatus</i>   | 1 | 1990 | January                | 20    | Gan Sh'muel                           | Coastal<br>plain-<br>Center   | 32.45 | 34.95 | Motro M.<br>M.    |
| HUJINVPSE 384 | Cheliferidae | <i>Rhacochelifer</i><br><i>longeunguiculatus</i>   | 3 | 1944 | May                    | 13    | Ben Shemen                            | Shfelat<br>Yehudah            | 31.96 | 34.92 |                   |
| HUJINVPSE 437 | Cheliferidae | <i>Rhacochelifer</i><br><i>longeunguiculatus</i>   | 1 | 1992 | October                | 3     | Ashqelon                              | Southern<br>Coastal<br>Plain  | 31.67 | 34.55 | Motro M.<br>M.    |
| HUJINVPSE 946 | Cheliferidae | <i>Rhacochelifer</i><br><i>longeunguiculatus</i>   | 7 | 2018 | July                   | 19    | Haruva cave                           | Judea                         | 31.91 | 34.96 | Aharon S.         |
| HUJINVPSE 742 | Cheliferidae | <i>Rhacochelifer</i><br><i>longeunguiculatus</i>   | 1 | 2022 | February               | 23    | Adulam park                           | Judea                         | 31.64 | 34.94 | Samet G.          |
| HUJINVPSE 367 | Cheliferidae | <i>Rhacochelifer</i><br><i>longeunguiculatus</i>   | 1 | 1938 | January                | 15    | Jerusalem                             | Judea                         | 31.77 | 35.21 |                   |
| HUJINVPSE 366 | Cheliferidae | <i>Rhacochelifer</i><br><i>longeunguiculatus</i>   | 1 | 1961 | May                    | 30    | Aqua Bella (En<br>Hemed)              | Judea                         | 31.8  | 35.13 | Shulov A.<br>S.   |
| HUJINVPSE 486 | Cheliferidae | <i>Rhacochelifer</i><br><i>longeunguiculatus</i>   | 1 | 1978 | May                    | 2     | Ramat Rahel                           | Judea                         | 31.74 | 35.22 | Levy G. L.        |
| HUJINVPSE 689 | Cheliferidae | <i>Rhacochelifer</i><br><i>longeunguiculatus</i>   | 2 | 2018 | July                   | 30    | Kidod cave (near<br>Arad)             | Negev                         | 31.24 | 35.25 | Aharon S.         |
| HUJINVPSE 693 | Cheliferidae | <i>Rhacochelifer</i><br><i>longeunguiculatus</i>   | 4 | 2018 | July                   | 30    | Kidod cave (near<br>Arad)             | Negev                         | 31.24 | 35.25 | Aharon S.         |
| HUJINVPSE 725 | Cheliferidae | <i>Rhacochelifer</i>                               | 1 | 2018 | July                   | 30    | Kidod cave (near                      | Negev                         | 31.24 | 35.25 | Aharon S.         |

|               |              |                                                                              |    |      |          |    |                               |                              |       |       |                                 |
|---------------|--------------|------------------------------------------------------------------------------|----|------|----------|----|-------------------------------|------------------------------|-------|-------|---------------------------------|
| HUJINVPSE 369 | Cheliferidae | <i>longeunguiculatus</i><br><i>Rhacochelifer</i><br><i>longeunguiculatus</i> | 2  | 1934 | December | 15 | Arad)<br>Kalia                | Dead Sea                     | 31.73 | 35.49 |                                 |
| HUJINVPSE 755 | Cheliferidae | <i>Rhacochelifer</i><br><i>longeunguiculatus</i>                             | 1  | 2022 | February | 17 | Nahal Pharan                  | Negev                        | 30.33 | 34.97 | Harms D.,<br>EGR,<br>Warburg S. |
| HUJINVPSE 391 | Cheliferidae | <i>Rhacochelifer</i><br><i>longeunguiculatus</i>                             | 2  | 1944 |          |    |                               |                              |       |       |                                 |
| HUJINVPSE 388 | Cheliferidae | <i>Rhacochelifer</i><br><i>longeunguiculatus</i>                             | 1  | 1938 | December | 12 |                               |                              |       |       |                                 |
| HUJINVPSE 780 | Cheliferidae | <i>Rhacochelifer</i><br><i>maculatus</i>                                     | 1  | 2022 | January  | 11 | Hazan Hills,<br>Amatzia       | Shfelat<br>Yehudah           | 31.52 | 34.91 | Pinchevsky<br>D.                |
| HUJINVPSE 292 | Cheliferidae | <i>Rhacochelifer</i><br><i>peculiaris latissimus</i>                         | 1  |      |          |    | Jerusalem, En<br>Karem        | Judea                        | 31.77 | 35.16 | Amitai P.<br>A.                 |
| HUJINVPSE 243 | Cheliferidae | <i>Rhacochelifer</i><br><i>peculiaris latissimus</i>                         | 1  |      |          |    |                               |                              |       |       | Steinitz H.<br>S.               |
| HUJINVPSE 10  | Cheliferidae | <i>Rhacochelifer</i><br><i>peculiaris peculiaris</i>                         | 1  | 1940 | April    | 28 | Hula                          | Hula valley                  | 33.07 | 35.6  |                                 |
| HUJINVPSE 12  | Cheliferidae | <i>Rhacochelifer</i><br><i>peculiaris peculiaris</i>                         | 1  | 1940 | April    | 28 | Hula                          | Hula valley                  | 33.07 | 35.6  |                                 |
| HUJINVPSE 17  | Cheliferidae | <i>Rhacochelifer</i><br><i>peculiaris peculiaris</i>                         | 1  | 1940 | April    | 28 | Hula                          | Hula valley                  | 33.07 | 35.6  |                                 |
| HUJINVPSE 11  | Cheliferidae | <i>Rhacochelifer</i><br><i>peculiaris peculiaris</i>                         | 1  | 1943 | November | 6  | Bet Aula                      | Judea                        | 31.6  | 35.03 |                                 |
| HUJINVPSE 13  | Cheliferidae | <i>Rhacochelifer</i><br><i>peculiaris peculiaris</i>                         | 1  | 1944 | March    | 3  | Nahal Revida<br>(=Wadi Ruwas) | Judea                        | 31.78 | 35.17 |                                 |
| HUJINVPSE 15  | Cheliferidae | <i>Rhacochelifer</i><br><i>peculiaris peculiaris</i>                         | 1  | 1944 | April    | 1  | near En Karem                 | Judea                        | 31.77 | 35.16 | Moskona                         |
| HUJINVPSE 18  | Cheliferidae | <i>Rhacochelifer</i><br><i>peculiaris peculiaris</i>                         | 1  | 1944 | March    | 6  | Bittir                        | Judea                        | 31.73 | 35.14 |                                 |
| HUJINVPSE 16  | Cheliferidae | <i>Rhacochelifer</i><br><i>peculiaris peculiaris</i>                         | 1  | 1961 | April    | 28 | Jerusalem                     | Judea                        | 31.77 | 35.21 | Wahrman J.<br>W.                |
| HUJINVPSE 14  | Cheliferidae | <i>Rhacochelifer</i><br><i>peculiaris peculiaris</i>                         | 1  | 1947 | March    | 20 | Nahal Timna                   | Arava                        | 29.81 | 35    | Shulov A.                       |
| HUJINVPSE 837 | Cheliferidae | <i>Rhacochelifer</i>                                                         | 1  | 2022 | May      | 2  | Tel Sokho                     | Shfelat<br>Yehudah           | 31.68 | 34.97 | Aharon S.                       |
| HUJINVPSE 922 | Cheliferidae | <i>Rhacochelifer</i>                                                         | 6  | 2022 | August   | 11 | Tel Sokho                     | Shfelat<br>Yehudah           | 31.68 | 34.97 | EGR, PPS,<br>GG                 |
| HUJINVPSE 790 | Cheliferidae |                                                                              | 1  | 2014 | March    | 13 | Yonim cave, Har<br>Gamal      | Western<br>Galilee           | 32.92 | 35.22 | Aharon S.,<br>EGR               |
| HUJINVPSE 732 | Cheliferidae |                                                                              | 1  | 2018 | July     | 25 | Tefen cave                    |                              | 32.97 | 35.28 | Aharon S.                       |
| HUJINVPSE 733 | Cheliferidae |                                                                              | 1  | 2018 | July     | 18 | Manot cave                    | Galilee                      | 32.77 | 35.65 | Aharon S.                       |
| HUJINVPSE 269 | Cheliferidae |                                                                              | 1  | 1945 | April    | 23 | Jenin                         | Samaria                      | 32.45 | 35.31 | Steinitz H.<br>S.               |
| HUJINVPSE 401 | Cheliferidae |                                                                              | 1  | 1938 | February | 15 |                               |                              |       |       | Paz M. J.                       |
| HUJINVPSE 545 | Chernetidae  | <i>Allochernes masi</i>                                                      | 5  | 1975 | January  | 21 | Ma'agan Mikhael               | Northern<br>Coastal<br>Plain | 32.55 | 34.91 | Costa M. C.                     |
| HUJINVPSE 85  | Chernetidae  | <i>Allochernes masi</i>                                                      | 1  | 1960 | October  | 10 | Bet Guvrin, Iraq el<br>Mai    | Shfelat<br>Yehudah           | 31.59 | 34.9  | Wahrman J.<br>W.                |
| HUJINVPSE 88  | Chernetidae  | <i>Allochernes masi</i>                                                      | 1  | 1960 | October  | 10 | Bet Guvrin, Iraq el<br>Mai    | Shfelat<br>Yehudah           | 31.59 | 34.9  | Wahrman J.<br>W.                |
| HUJINVPSE 320 | Chernetidae  | <i>Allochernes masi</i>                                                      | 1  | 1961 | August   | 30 | Bet Govrin caves              | Shfelat<br>Yehudah           | 31.59 | 34.9  | Pener                           |
| HUJINVPSE 888 | Chernetidae  | <i>Allochernes masi</i>                                                      | 2  | 2022 | May      | 16 | Yir'on cave                   | Galilee                      | 33.07 | 35.46 | Aharon S.,<br>Warburg S.        |
| HUJINVPSE 721 | Chernetidae  | <i>Chernes rhodinus</i>                                                      | 20 | 2018 | August   | 20 | Sefunim cave                  | Carmel                       | 32.74 | 34.98 | Aharon S.                       |
| HUJINVPSE 793 | Chernetidae  | <i>Chernes rhodinus</i>                                                      | 1  | 2018 | August   | 20 | Sefunim cave                  | Carmel                       | 32.74 | 34.98 | Aharon S.,<br>EGR, JB,<br>GG    |

|               |             |                               |    |      |           |    |                                      |                        |       |       |                          |
|---------------|-------------|-------------------------------|----|------|-----------|----|--------------------------------------|------------------------|-------|-------|--------------------------|
| HUJINVPSE 718 | Chernetidae | <i>Chernes rhodinus</i>       | 1  | 2014 | May       | 2  | Beit Arif cave                       | Shfelat Yehudah        | 31.99 | 34.96 | Aharon S.                |
| HUJINVPSE 691 | Chernetidae | <i>Chernes</i>                | 1  | 2018 | August    | 20 | Ornit cave                           | Carmel                 | 32.76 | 34.99 | Aharon S.                |
| HUJINVPSE 69  | Chernetidae | <i>Lamprochernes nodosus</i>  | 1  | 1947 | September |    | Jerusalem                            | Judea                  | 31.77 | 35.21 | Theodor                  |
| HUJINVPSE 72  | Chernetidae | <i>Lamprochernes nodosus</i>  | 1  | 1947 | September |    | Jerusalem                            | Judea                  | 31.77 | 35.21 | Theodor                  |
| HUJINVPSE 70  | Chernetidae | <i>Lamprochernes nodosus</i>  | 1  | 1948 | July      | 7  | Jerusalem                            | Judea                  | 31.77 | 35.21 | Theodor                  |
| HUJINVPSE 466 | Chernetidae | <i>Lamprochernes savignyi</i> | 12 | 1964 | June      | 9  | Tivon                                | Jezreel valley         | 32.72 | 35.12 | Beyerauo Y.              |
| HUJINVPSE 491 | Chernetidae | <i>Lamprochernes savignyi</i> | 9  | 1966 | May       | 26 | Mishmar Ha'emek                      | Jezreel Valley         | 32.61 | 35.14 | Costa M. C.              |
| HUJINVPSE 525 | Chernetidae | <i>Lamprochernes savignyi</i> | 11 | 1966 | June      | 5  | Mishmar Ha'emek                      | Jezreel Valley         | 32.61 | 35.14 | Costa M. C.              |
| HUJINVPSE 531 | Chernetidae | <i>Lamprochernes savignyi</i> | 12 | 1966 | September | 12 | Mishmar Ha'emek                      | Jezreel Valley         | 32.61 | 35.14 | Costa M. C.              |
| HUJINVPSE 546 | Chernetidae | <i>Lamprochernes savignyi</i> | 34 | 1967 | March     | 1  | Mishmar Ha'emek                      | Jezreel Valley         | 32.61 | 35.14 | Costa M. C.              |
| HUJINVPSE 68  | Chernetidae | <i>Lamprochernes savignyi</i> | 1  | 1961 | June      | 3  | Kinneret                             | Galil                  | 32.89 | 35.58 | Katznelson               |
| HUJINVPSE 295 | Chernetidae | <i>Lamprochernes savignyi</i> | 1  | 1961 | November  | 5  | Kfar Haro'e                          | Coastal plain-Center   | 32.39 | 34.91 | Weltsch Y. W.            |
| HUJINVPSE 444 | Chernetidae | <i>Lamprochernes savignyi</i> | 6  | 1967 | October   | 25 | Nof Yam                              | Coastal plain-Center   | 32.19 | 34.81 | Ofer J. O.               |
| HUJINVPSE 450 | Chernetidae | <i>Lamprochernes savignyi</i> | 1  | 1971 | August    | 8  | Beror Hayil                          | Southern Coastal Plain | 31.56 | 34.64 | Tsoran Y. T.             |
| HUJINVPSE 314 | Chernetidae | <i>Lamprochernes savignyi</i> | 1  | 1961 | June      | 4  | Jerusalem                            | Judea                  | 31.77 | 35.21 | Margalith J. M.          |
| HUJINVPSE 671 | Chernetidae | <i>Lamprochernes savignyi</i> | 2  | 2018 | March     | 26 | Jerusalem                            | Judea                  | 31.77 | 35.21 |                          |
| HUJINVPSE 672 | Chernetidae | <i>Lamprochernes savignyi</i> | 1  | 2018 | March     | 26 | Jerusalem                            | Judea                  | 31.77 | 35.21 |                          |
| HUJINVPSE 576 | Chernetidae | <i>Lamprochernes savignyi</i> | 1  | 1975 | June      | 16 | Hurshat Mansura                      | Galilee/Golan          | 32.97 | 35.62 | Faunistics               |
| HUJINVPSE 71  | Chernetidae | <i>Lamprochernes savignyi</i> | 1  |      |           |    |                                      |                        |       |       |                          |
| HUJINVPSE 462 | Chernetidae | <i>Lasiochernes turcicus</i>  | 1  | 1954 | June      | 25 | Nahal Keren                          | Western Galilee Kziv   | 33.04 | 35.27 | Costa M.                 |
| HUJINVPSE 715 | Chernetidae | <i>Lasiochernes turcicus</i>  | 1  | 2015 | July      | 30 | Manot cave                           | Galilee                | 32.77 | 35.65 | Kremer E., knnyot D.     |
| HUJINVPSE 717 | Chernetidae | <i>Lasiochernes turcicus</i>  | 1  | 2015 | July      | 30 | Manot cave                           | Galilee                | 32.77 | 35.65 | Aharon S. Boaz L.        |
| HUJINVPSE 724 | Chernetidae | <i>Lasiochernes turcicus</i>  | 5  | 2018 | July      | 18 | Manot cave                           | Galilee                | 32.77 | 35.65 | Aharon S.                |
| HUJINVPSE 727 | Chernetidae | <i>Lasiochernes turcicus</i>  | 1  | 2018 | July      | 25 | Tefen cave                           |                        | 32.97 | 35.28 | Aharon S.                |
| HUJINVPSE 86  | Chernetidae | <i>Lasiochernes turcicus</i>  | 1  | 1954 | February  | 3  | Aqua Bella (En Hemed)                | Judea                  | 31.8  | 35.13 | Theodor                  |
| HUJINVPSE 89  | Chernetidae | <i>Lasiochernes turcicus</i>  | 1  | 1954 | March     | 8  | Aqua Bella (En Hemed)                | Judea                  | 31.8  | 35.13 |                          |
| HUJINVPSE 87  | Chernetidae | <i>Lasiochernes turcicus</i>  | 1  | 1959 | November  | 14 | Hirbat Sa'adim (Hirbet Qaryet Saide) | Judea                  | 31.75 | 35.13 | Wahrman J. W. & Ritte U. |
| HUJINVPSE 90  | Chernetidae | <i>Lasiochernes turcicus</i>  | 1  | 1961 | February  | 10 | Bet Meir (Hamasrek)                  | Judea                  | 31.79 | 35.04 | Wahrman J. W.            |
| HUJINVPSE 78  | Chernetidae | <i>Nudochernes spalacis</i>   | 1  | 1968 | February  | 13 | Sa'ar                                | Galil                  | 33.03 | 35.11 | Costa M.                 |
| HUJINVPSE 74  | Chernetidae | <i>Nudochernes spalacis</i>   | 1  | 1968 | March     | 2  | Nablus                               | Samaria                | 32.23 | 35.26 | Costa M.                 |

|               |                                         |    |      |           |    |                                       |                        |       |       |                       |
|---------------|-----------------------------------------|----|------|-----------|----|---------------------------------------|------------------------|-------|-------|-----------------------|
| HUJINVPSE 79  | Chernetidae <i>Nudochernes spalacis</i> | 1  | 1954 | March     | 3  | Lod (Lydda)                           | Shfelat Yehudah        | 31.96 | 34.88 |                       |
| HUJINVPSE 84  | Chernetidae <i>Nudochernes spalacis</i> | 1  | 1954 | March     | 3  | Lod (Lydda)                           | Shfelat Yehudah        | 31.96 | 34.88 |                       |
| HUJINVPSE 83  | Chernetidae <i>Nudochernes spalacis</i> | 1  | 1968 | March     | 26 | South of Gaza                         | Southern Coastal Plain | 31.48 | 34.42 | Costa M.              |
| HUJINVPSE 76  | Chernetidae <i>Nudochernes spalacis</i> | 1  | 1968 | February  | 23 | Emek Ayyalon                          | Shfelat Yehudah        | 31.84 | 35.01 | Costa M.              |
| HUJINVPSE 80  | Chernetidae <i>Nudochernes spalacis</i> | 1  | 1954 | February  | 20 | Jerusalem                             | Judea                  | 31.77 | 35.21 |                       |
| HUJINVPSE 82  | Chernetidae <i>Nudochernes spalacis</i> | 1  | 1954 | March     | 22 | Jerusalem                             | Judea                  | 31.77 | 35.21 | Wahrman J. W.         |
| HUJINVPSE 449 | Chernetidae <i>Nudochernes spalacis</i> | 38 | 1964 | February  | 20 | Jerusalem                             | Judea                  | 31.77 | 35.21 | Costa M. C.           |
| HUJINVPSE 477 | Chernetidae <i>Nudochernes spalacis</i> | 12 | 1966 | February  | 12 | Jerusalem                             | Judea                  | 31.77 | 35.21 | Katznelson            |
| HUJINVPSE 73  | Chernetidae <i>Nudochernes spalacis</i> | 1  | 1968 | March     | 5  | Gush Ezion                            | Judea                  | 31.66 | 35.12 | Costa M.              |
| HUJINVPSE 77  | Chernetidae <i>Nudochernes spalacis</i> | 1  | 1968 | February  | 15 | Jerusalem                             | Judea                  | 31.77 | 35.21 | Costa M.              |
| HUJINVPSE 81  | Chernetidae <i>Nudochernes spalacis</i> | 1  | 1968 | March     | 8  | Vicinity of Hebron                    | Judea                  | 31.5  | 35.13 | Costa M.              |
| HUJINVPSE 458 | Chernetidae <i>Nudochernes spalacis</i> | 21 | 1968 | February  | 12 | Jerusalem                             | Judea                  | 31.77 | 35.21 | Costa M. C.           |
| HUJINVPSE 75  | Chernetidae <i>Nudochernes spalacis</i> | 1  | 1968 | March     | 26 | Yeruham                               | Negev                  | 30.99 | 34.91 | Costa M.              |
| HUJINVPSE 452 | Chernetidae <i>Nudochernes spalacis</i> | 1  | 1968 | April     | 9  | Mt. Hermon, 2200m                     | Hermon                 | 33.32 | 35.79 | Nevo E. N. & Costa M. |
| HUJINVPSE 472 | Chernetidae <i>Nudochernes spalacis</i> | 17 | 1968 | April     | 9  | Mt. Hermon, 2200m                     | Hermon                 | 33.32 | 35.79 | Nevo E. N. & Costa M. |
| HUJINVPSE 828 | Chernetidae                             | 1  | 2021 | August    | 18 | Shfanim cave                          | Upper Galilee          | 32.96 | 35.39 | Ganem Z. M.           |
| HUJINVPSE 846 | Chernetidae                             | 1  | 2022 | May       | 16 | Seter cave near Ein Koves/ Nahal Amud | Eastern Upper Galilee  | 32.94 | 35.48 | Aharon S.             |
| HUJINVPSE 821 | Chernetidae                             | 1  | 2021 | August    | 16 | Sefunim cave                          | Carmel                 | 32.74 | 34.98 | Ganem Z. M.           |
| HUJINVPSE 822 | Chernetidae                             | 1  | 2021 | August    | 16 | Sefunim cave                          | Carmel                 | 32.74 | 34.98 | Ganem Z. M.           |
| HUJINVPSE 823 | Chernetidae                             | 1  | 2021 | August    | 16 | Sefunim cave                          | Carmel                 | 32.74 | 34.98 | Ganem Z. M.           |
| HUJINVPSE 824 | Chernetidae                             | 3  | 2021 | August    | 16 | Sefunim cave                          | Carmel                 | 32.74 | 34.98 | Ganem Z. M.           |
| HUJINVPSE 825 | Chernetidae                             | 6  | 2021 | August    | 16 | Sefunim cave                          | Carmel                 | 32.74 | 34.98 | Ganem Z. M.           |
| HUJINVPSE 826 | Chernetidae                             | 5  | 2021 | August    | 16 | Sefunim cave                          | Carmel                 | 32.74 | 34.98 | Ganem Z. M.           |
| HUJINVPSE 827 | Chernetidae                             | 12 | 2021 | August    | 16 | Sefunim cave                          | Carmel                 | 32.74 | 34.98 | Ganem Z. M.           |
| HUJINVPSE 442 | Chernetidae                             | 2  | 1967 | September | 29 | Nahsholim                             | Carmel                 | 32.61 | 34.92 | Costa M. C.           |
| HUJINVPSE 679 | Chernetidae                             | 1  | 1968 | March     | 4  | Nahal Sha'ar                          | Samaria                | 32.12 | 35.06 | Costa M. C.           |
| HUJINVPSE 816 | Chernetidae                             | 1  | 2021 | September | 8  | Tinshemet cave                        | Shfelat Yehudah        | 32    | 34.96 | Ganem Z. M.           |
| HUJINVPSE 817 | Chernetidae                             | 1  | 2021 | September | 8  | Tinshemet cave                        | Shfelat Yehudah        | 32    | 34.96 | Ganem Z. M.           |
| HUJINVPSE 818 | Chernetidae                             | 1  | 2021 | September | 8  | Tinshemet cave                        | Shfelat Yehudah        | 32    | 34.96 | Ganem Z. M.           |
| HUJINVPSE 819 | Chernetidae                             | 1  | 2021 | September | 8  | Tinshemet cave                        | Shfelat Yehudah        | 32    | 34.96 | Ganem Z. M.           |
| HUJINVPSE 820 | Chernetidae                             | 1  | 2021 | September | 8  | Tinshemet cave                        | Shfelat Yehudah        | 32    | 34.96 | Ganem Z. M.           |
| HUJINVPSE 698 | Chernetidae                             | 1  | 2021 | September | 12 | Teomim cave                           | Judea                  | 31.73 | 35.02 | Ganem Z. M.           |
| HUJINVPSE 836 | Chernetidae                             | 1  | 2022 | April     | 28 | Sdeh Boqer Ben Gurion Midrasha        | Negev mt.              | 30.85 | 34.78 | EGR                   |
| HUJINVPSE 720 | Chthoniidae <i>Ephippiochtonius</i>     | 1  | 2021 | May       | 26 | Ornit cave                            | Carmel                 | 32.76 | 34.99 | Aharon S.             |

|               |             |                                    |    |      |          |    |                                                |                             |       |       |                                                                    |
|---------------|-------------|------------------------------------|----|------|----------|----|------------------------------------------------|-----------------------------|-------|-------|--------------------------------------------------------------------|
| HUJINVPSE 791 | Chthoniidae | <i>Ephippiochthonius</i>           | 1  | 2021 | August   | 19 | Ornit cave                                     | Carmel                      | 32.76 | 34.99 | Aharon S.                                                          |
| HUJINVPSE 918 | Chthoniidae | <i>Ephippiochthonius</i>           | 1  | 2022 | August   | 10 | Ornit cave                                     | Carmel                      | 32.76 | 34.99 | Ganem Z.<br>M.<br>BK, PPS,<br>GG, HS,<br>SW,<br>BK, PPS,<br>GG, HS |
| HUJINVPSE 920 | Chthoniidae | <i>Ephippiochthonius</i>           | 10 | 2022 | August   | 10 | Ornit cave                                     | Carmel                      | 32.76 | 34.99 |                                                                    |
| HUJINVPSE 919 | Chthoniidae | <i>Ephippiochthonius</i>           | 2  | 2022 | August   | 10 | Ornit cave                                     | Carmel                      | 32.76 | 34.99 |                                                                    |
| HUJINVPSE 851 | Chthoniidae | <i>Ayyalonia<br/>dimentmani</i>    | 5  | 2006 | July     |    | Ayyalon cave                                   | Shfelat<br>Yehudah          | 31.91 | 34.93 | Dimmentm<br>an H.                                                  |
| HUJINVPSE 93  | Chthoniidae | <i>Ayyalonia<br/>dimentmani</i>    | 4  | 2008 | December | 12 | Ayyalon cave                                   | Shfelat<br>Yehudah          | 31.91 | 34.93 | Naaman I.                                                          |
| HUJINVPSE 743 | Chthoniidae | <i>Ayyalonya</i>                   | 1  | 2021 | August   |    | Yir'on cave                                    |                             | 33.07 | 35.46 | Aharon S.                                                          |
| HUJINVPSE 890 | Chthoniidae | <i>Ayyalonya</i>                   | 4  | 2022 | May      | 16 | Yir'on cave                                    | Galilee                     | 33.07 | 35.46 | Aharon S.,<br>Warburg S.                                           |
| HUJINVPSE 847 | Chthoniidae | <i>Ephippiochthonius</i>           | 1  | 2022 | May      | 16 | Seter cave near Ein<br>Koves/ Nahal<br>Amud    | Eastern<br>Upper<br>Galilee | 32.94 | 35.48 | Aharon S.                                                          |
| HUJINVPSE 728 | Chthoniidae | <i>Ephippiochthonius</i>           | 1  | 2018 | August   | 20 | Ornit cave                                     | Carmel                      | 32.76 | 34.99 | Aharon S.                                                          |
| HUJINVPSE 745 | Chthoniidae | <i>Ephippiochthonius</i>           | 3  |      |          |    | Arak Na'asane cave<br>(Wadi Dalia)             | Judean<br>Desert            | 31.99 | 35.41 |                                                                    |
| HUJINVPSE 287 | Chthoniidae | <i>Chthonius</i>                   | 1  | 1996 | July     |    | Bar'am Forest                                  | Galilee                     | 33.04 | 35.42 | Sharon R.                                                          |
| HUJINVPSE 785 | Chthoniidae | <i>Ephippiochthonius</i>           | 1  | 2021 | August   | 16 | Serach cave                                    | Western<br>Upper<br>Galilee | 33.07 | 35.24 | Aharon S.                                                          |
| HUJINVPSE 849 | Chthoniidae | <i>Ephippiochthonius</i>           | 1  | 2022 | May      | 17 | Namer cave                                     | Upper<br>Galilee            | 33.08 | 35.2  | Aharon S.                                                          |
| HUJINVPSE 744 | Chthoniidae | <i>Ephippiochthonius</i>           | 1  |      |          |    | Serach cave                                    |                             | 33.07 | 35.24 |                                                                    |
| HUJINVPSE 280 | Chthoniidae | <i>Ephippiochthonius</i>           | 2  | 1943 | April    | 24 | N. Revida Sela<br>Ha'pil (Jerusalem<br>Forest) | Judea                       | 31.78 | 35.17 | Steinitz H.<br>S.                                                  |
| HUJINVPSE 845 | Chthoniidae | <i>Ephippiochthonius</i>           | 1  | 2022 | May      | 16 | Serach cave                                    | Western<br>Upper<br>Galilee | 33.07 | 35.24 | Aharon S.                                                          |
| HUJINVPSE 850 | Chthoniidae | <i>Ephippiochthonius</i>           | 3  | 2022 | May      | 17 | Irav cave near<br>Arab-el-Aramshe              | Western<br>Upper<br>Galilee | 33.08 | 35.23 | Warburg S.                                                         |
| HUJINVPSE 298 | Chthoniidae | <i>Ephippiochthonius</i>           | 1  | 1961 | May      | 13 | Gachule ('En Teo)                              | Galilee                     | 33.1  | 35.61 | Amitai P.<br>A.                                                    |
| HUJINVPSE 341 | Chthoniidae | <i>Ephippiochthonius</i>           | 1  | 1961 | May      | 13 | Gachule ('En Teo)                              | Galilee                     | 33.1  | 35.61 | Amitai P.<br>A.                                                    |
| HUJINVPSE 719 | Chthoniidae | <i>Ephippiochthonius</i>           | 1  | 2014 | March    | 12 | Yir'on cave                                    | Galilee                     | 33.07 | 35.46 | Aharon S.                                                          |
| HUJINVPSE 580 | Chthoniidae | <i>Ephippiochthonius</i>           | 1  | 2017 | June     | 11 | Tel Dan Reserve                                | Galilee                     | 33.25 | 35.65 | Opiliones<br>curse                                                 |
| HUJINVPSE 889 | Chthoniidae | <i>Ephippiochthonius</i>           | 1  | 2022 | May      | 16 | Yir'on cave                                    | Galilee                     | 33.07 | 35.46 | Aharon S.,<br>Warburg S.                                           |
| HUJINVPSE 716 | Chthoniidae | <i>Ephippiochthonius</i>           | 1  | 2014 | March    | 13 | Hurbat Raqqit                                  | Carmel                      | 32.71 | 35.02 | Aharon S.                                                          |
| HUJINVPSE 241 | Chthoniidae | <i>Ephippiochthonius</i>           | 1  | 1974 | February | 27 | En Arik                                        | Judea/Sama<br>ria           | 31.91 | 35.14 | Tsabar G.<br>T.                                                    |
| HUJINVPSE 778 | Chthoniidae | <i>Ephippiochthonius</i>           | 1  | 2022 | January  | 11 | Hazan Hills,<br>Amatzia                        | Shfelat<br>Yehudah          | 31.52 | 34.91 | Pinchevsky<br>D.                                                   |
| HUJINVPSE 779 | Chthoniidae | <i>Ephippiochthonius</i>           | 1  | 2022 | January  | 11 | Hazan Hills,<br>Amatzia                        | Shfelat<br>Yehudah          | 31.52 | 34.91 | Pinchevsky<br>D.                                                   |
| HUJINVPSE 783 | Chthoniidae | <i>Ephippiochthonius</i>           | 1  | 2022 | January  | 11 | Hazan Hills,<br>Amatzia                        | Shfelat<br>Yehudah          | 31.52 | 34.91 | Pinchevsky<br>D.                                                   |
| HUJINVPSE 740 | Chthoniidae | <i>Ephippiochthonius<br/>sacer</i> | 1  | 1965 | December | 23 | Nahal Amud                                     | Galilee                     | 32.97 | 35.47 | Costa M. C.                                                        |
| HUJINVPSE 776 | Chthoniidae | <i>Ephippiochthonius<br/>sacer</i> | 1  | 2022 | January  | 11 | Hazan Hills,<br>Amatzia                        | Shfelat<br>Yehudah          | 31.52 | 34.91 | Pinchevsky<br>D.                                                   |

|               |             |                                        |   |      |            |    |                                          |                      |       |       |                                             |
|---------------|-------------|----------------------------------------|---|------|------------|----|------------------------------------------|----------------------|-------|-------|---------------------------------------------|
| HUJINVPSE 92  | Chthoniidae | <i>Ephippiochthonius sacer</i>         | 1 | 1943 | January    | 9  | Jerusalem, Ge-Hinnom                     | Judea                | 31.77 | 35.23 |                                             |
| HUJINVPSE 242 | Chthoniidae | <i>Ephippiochthonius sacer</i>         | 5 | 1943 | February   | 16 | Jerusalem, Ge-Hinnom                     | Judea                | 31.77 | 35.23 | Steinitz H. S.                              |
| HUJINVPSE 885 | Chthoniidae | <i>Ephippiochthonius tetrachelatus</i> | 1 | 2022 | May        | 1  | Mt. Meiron- Afa'im                       | Upper Galilee        | 32.99 | 35.41 | M. Finkel , Y. Goren                        |
| HUJINVPSE 931 | Chthoniidae | <i>Ephippiochthonius</i>               | 3 | 2007 | May        | 18 | Sha'at cave (near Karnei Shomron)        | West Samaria         | 32.17 | 35.1  | Israel Naaman                               |
| HUJINVPSE 741 | Chthoniidae | <i>Ephippiochthonius</i>               | 1 | 1965 | December   | 23 | Nahal Amud                               | Galilee              | 32.98 | 35.47 | Costa M. C.                                 |
| HUJINVPSE 91  | Chthoniidae | <i>Ephippiochthonius tetrachelatus</i> | 1 | 1944 | March      |    | N. Revida Sela Ha'pil (Jerusalem Forest) | Judea                | 31.78 | 35.17 |                                             |
| HUJINVPSE 943 | Chthoniidae | <i>Ephippiochthonius</i>               | 1 | 2023 | January    | 19 | Sussita cave                             | Golan                | 32.78 | 35.66 | Pavlek M. Ganem Z. M. , Aharon S. E. Gavish |
| HUJINVPSE 944 | Chthoniidae | <i>Ephippiochthonius</i>               | 2 | 2023 | January    | 19 | Sussita cave                             | Golan                | 32.78 | 35.66 | Regev et al. Ganem Z. M. E. Gavish          |
| HUJINVPSE 688 | Chthoniidae | <i>Ephippiochthonius</i>               | 1 | 2021 | September  | 12 | Teomim cave                              | Judea                | 31.73 | 35.02 | Regev et al. Yuval Z.                       |
| HUJINVPSE 700 | Chthoniidae | <i>Ephippiochthonius</i>               | 1 | 2021 | September  | 12 | Teomim cave                              | Judea                | 31.73 | 35.02 | Aharon S. Ganem Z. M.                       |
| HUJINVPSE 786 | Chthoniidae | <i>Ephippiochthonius</i>               | 1 | 2021 | September  | 12 | Teomim cave                              | Judea                | 31.73 | 35.02 | Regev et al. Yuval Z.                       |
| HUJINVPSE 789 | Chthoniidae | <i>Ephippiochthonius</i>               | 1 | 2021 | September? | 12 | Teomim cave                              | Judea                | 31.73 | 35.02 | Aharon S.                                   |
| HUJINVPSE 829 | Chthoniidae | <i>Ephippiochthonius</i>               | 1 | 2021 | September  | 12 | Teomim cave                              | Judea                | 31.73 | 35.02 | Ganem Z. M.                                 |
| HUJINVPSE 830 | Chthoniidae | <i>Ephippiochthonius</i>               | 1 | 2021 | September  | 12 | Teomim cave                              | Judea                | 31.73 | 35.02 | Ganem Z. M.                                 |
| HUJINVPSE 916 | Chthoniidae | <i>Ephippiochthonius</i>               | 1 | 2022 | August     | 7  | Teomim cave                              | Judea                | 31.73 | 35.02 | Gainett G.                                  |
| HUJINVPSE 939 | Chthoniidae | <i>Ephippiochthonius</i>               | 2 | 2023 | January    | 12 | Teomim cave                              | Judea                | 31.73 | 35.02 | Aharon S.                                   |
| HUJINVPSE 936 | Chthoniidae | <i>Ephippiochthonius</i>               | 3 | 2023 | January    | 12 | Teomim cave                              | Judea                | 31.73 | 35.02 | Pavlek M.                                   |
| HUJINVPSE 938 | Chthoniidae | <i>Ephippiochthonius</i>               | 3 | 2023 | January    | 12 | Teomim cave                              | Judea                | 31.73 | 35.02 | Warburg S.                                  |
| HUJINVPSE 937 | Chthoniidae | <i>Ephippiochthonius</i>               | 2 | 2023 | January    | 12 | Teomim cave                              | Judea                | 31.73 | 35.02 | Pavlek M. Ganem Z. M.                       |
| HUJINVPSE 696 | Chthoniidae | <i>Ephippiochthonius</i>               | 1 | 2021 | August     | 19 | Ornit cave                               | Carmel               | 32.76 | 34.99 | Ganem Z. M.                                 |
| HUJINVPSE 697 | Chthoniidae | <i>Ephippiochthonius</i>               | 1 | 2021 | August     | 19 | Ornit cave                               | Carmel               | 32.76 | 34.99 | Ganem Z. M.                                 |
| HUJINVPSE 787 | Chthoniidae | <i>Ephippiochthonius</i>               | 1 | 2021 | August     | 19 | Ornit cave                               | Carmel               | 32.76 | 34.99 | Aharon S.                                   |
| HUJINVPSE 940 | Chthoniidae | <i>Ephippiochthonius</i>               | 2 | 2023 | January    | 18 | Ornit cave                               | Carmel               | 32.76 | 34.99 | Aharon S.                                   |
| HUJINVPSE 941 | Chthoniidae | <i>Ephippiochthonius</i>               | 4 | 2023 | January    | 18 | Ornit cave                               | Carmel               | 32.76 | 34.99 | Pavlek M.                                   |
| HUJINVPSE 942 | Chthoniidae | <i>Ephippiochthonius</i>               | 3 | 2023 | January    | 18 | Ornit cave                               | Carmel               | 32.76 | 34.99 | Pavlek M.                                   |
| HUJINVPSE 108 | Garypidae   | <i>Garypus beauvoisi</i>               | 2 | 1940 | May        | 26 | Atlit                                    | Carmel coast         | 32.71 | 34.94 |                                             |
| HUJINVPSE 109 | Garypidae   | <i>Garypus beauvoisi</i>               | 2 | 1940 | March      | 23 | Bat Galim, Haifa                         | Carmel coast         | 32.84 | 34.98 | Shulov A.                                   |
| HUJINVPSE 394 | Garypidae   | <i>Garypus beauvoisi</i>               | 4 | 1940 | March      | 23 | Bat Galim, Haifa                         | Carmel coast         | 32.84 | 34.98 |                                             |
| HUJINVPSE 457 | Garypidae   | <i>Garypus beauvoisi</i>               | 8 | 1967 | September  | 20 | Nahsholim                                | Carmel coast         | 32.61 | 34.92 | Costa M. C.                                 |
| HUJINVPSE 513 | Garypidae   | <i>Garypus beauvoisi</i>               | 5 | 1971 | July       | 20 | Shave Ziyon                              | Galil coast          | 32.98 | 35.08 | Costa M. C.                                 |
| HUJINVPSE 536 | Garypidae   | <i>Garypus beauvoisi</i>               | 5 | 1971 | July       | 27 | Nahsholim                                | Carmel coast         | 32.61 | 34.92 | Costa M. C.                                 |
| HUJINVPSE 110 | Garypidae   | <i>Garypus levantinus</i>              | 1 | 1961 | June       | 5  | Mikhmoret                                | Coastal plain-Center | 32.41 | 34.87 | Safriel U.                                  |
| HUJINVPSE 521 | Garypidae   | <i>Garypus levantinus</i>              | 3 | 1965 | June       | 17 | Tantura (Dor) sea shore                  | Carmel coast         | 32.58 | 34.91 | Costa M. C.                                 |
| HUJINVPSE 489 | Garypidae   | <i>Garypus levantinus</i>              | 1 | 1969 | June       | 18 | Nahsholim                                | Carmel               | 32.61 | 34.92 | Sandler H.                                  |

|               |             |                           |   |      |         |    |                                       | coast                 |       |       | S.                                          |
|---------------|-------------|---------------------------|---|------|---------|----|---------------------------------------|-----------------------|-------|-------|---------------------------------------------|
| HUJINVPSE 447 | Garypidae   | <i>Garypus levantinus</i> | 1 | 1964 | May     | 6  | Mikhmoret                             | Coastal plain-Center  | 32.41 | 34.87 | Safriel U.                                  |
| HUJINVPSE 948 | Garypinidae | <i>Garypinus</i>          | 1 | 2018 | August  | 25 | Marva cave (near Meona)               | Galilee               | 33.02 | 35.24 | Aharon S.                                   |
| HUJINVPSE 848 | Garypinidae | <i>Garypinus</i>          | 3 | 2022 | May     | 16 | Seter cave near Ein Koves/ Nahal Amud | Eastern Upper Galilee | 32.94 | 35.48 | Warburg S.                                  |
| HUJINVPSE 584 | Garypinidae | <i>Garypinus</i>          | 2 | 2017 | June    | 9  | Mt. Meron                             | Galil                 | 32.99 | 35.41 | E. Gavish Regev et al.                      |
| HUJINVPSE 711 | Garypinidae | <i>Garypinus</i>          | 3 | 2017 | June    | 11 | Tel Dan Reserve                       | Galil                 | 33.25 | 35.65 | Opiliones curse Chipman A.D., Edgecomb G.D. |
| HUJINVPSE 930 | Garypinidae | <i>Garypinus</i>          | 1 | 2022 | October | 22 | Snir                                  | Galilee               | 33.24 | 35.68 | EGR, PPS, GG                                |
| HUJINVPSE 949 | Garypinidae | <i>Garypinus</i>          | 2 | 2022 | August  | 16 | Nahal Socho                           | Shfelat Yehudah       | 31.63 | 34.97 | E. Gavish Regev et al.                      |
| HUJINVPSE 593 | Garypinidae | <i>Garypinus asper</i>    | 3 | 2017 | June    | 9  | Nahal Bezet                           | Galil                 | 33.07 | 35.7  | Aharon S.                                   |
| HUJINVPSE 690 | Garypinidae | <i>Garypinus asper</i>    | 1 | 2018 | August  | 22 | Yehiam wadi                           | Western Galilee       | 32.99 | 35.22 | Aharon S.                                   |
| HUJINVPSE 694 | Garypinidae | <i>Garypinus asper</i>    | 5 | 2018 | July    | 24 | Serach cave                           | Western Galilee       | 33.07 | 35.24 | Aharon S.                                   |
| HUJINVPSE 729 | Garypinidae | <i>Garypinus asper</i>    | 1 | 2018 | July    | 24 | Serach cave                           | Galilee               | 33.07 | 35.24 | Aharon S.                                   |
| HUJINVPSE 854 | Garypinidae | <i>Garypinus asper</i>    | 1 | 2022 | June    | 3  | Mt. Meiron-Hurfeish                   | Upper Galilee         | 33.02 | 35.33 | M. Finkel , Y. Goren                        |
| HUJINVPSE 855 | Garypinidae | <i>Garypinus asper</i>    | 1 | 2022 | June    | 12 | Mt. Meiron-Hurfeish                   | Upper Galilee         | 33.02 | 35.33 | M. Finkel , Y. Goren                        |
| HUJINVPSE 856 | Garypinidae | <i>Garypinus asper</i>    | 1 | 2022 | June    | 3  | Mt. Meiron-Hurfeish                   | Upper Galilee         | 33.02 | 35.33 | M. Finkel , Y. Goren                        |
| HUJINVPSE 858 | Garypinidae | <i>Garypinus asper</i>    | 1 | 2022 | June    | 12 | Mt. Meiron-Humema                     | Upper Galilee         | 33.01 | 35.4  | M. Finkel , Y. Goren                        |
| HUJINVPSE 859 | Garypinidae | <i>Garypinus asper</i>    | 1 | 2022 | May     | 1  | Mt. Meiron-Hurfeish                   | Upper Galilee         | 33.02 | 35.33 | M. Finkel , Y. Goren                        |
| HUJINVPSE 861 | Garypinidae | <i>Garypinus asper</i>    | 1 | 2022 | May     | 1  | Mt. Meiron-Hurfeish                   | Upper Galilee         | 33.02 | 35.33 | M. Finkel , Y. Goren                        |
| HUJINVPSE 862 | Garypinidae | <i>Garypinus asper</i>    | 1 | 2022 | May     | 1  | Mt. Meiron-Hurfeish                   | Upper Galilee         | 33.02 | 35.33 | M. Finkel , Y. Goren                        |
| HUJINVPSE 863 | Garypinidae | <i>Garypinus asper</i>    | 1 | 2022 | April   | 21 | Mt. Meiron-Hurfeish                   | Upper Galilee         | 33.02 | 35.33 | M. Finkel , Y. Goren                        |
| HUJINVPSE 865 | Garypinidae | <i>Garypinus asper</i>    | 1 | 2022 | May     | 19 | Mt. Meiron-Hurfeish                   | Upper Galilee         | 33.02 | 35.33 | M. Finkel , Y. Goren                        |
| HUJINVPSE 866 | Garypinidae | <i>Garypinus asper</i>    | 1 | 2022 | May     | 28 | Mt. Meiron-Hurfeish                   | Upper Galilee         | 33.02 | 35.33 | M. Finkel , Y. Goren                        |
| HUJINVPSE 869 | Garypinidae | <i>Garypinus asper</i>    | 1 | 2022 | May     | 19 | Mt. Meiron-Hurfeish                   | Upper Galilee         | 33.02 | 35.33 | M. Finkel , Y. Goren                        |
| HUJINVPSE 870 | Garypinidae | <i>Garypinus asper</i>    | 1 | 2022 | May     | 19 | Mt. Meiron-Hurfeish                   | Upper Galilee         | 33.02 | 35.33 | M. Finkel , Y. Goren                        |
| HUJINVPSE 871 | Garypinidae | <i>Garypinus asper</i>    | 1 | 2022 | May     | 28 | Mt. Meiron-Hurfeish                   | Upper Galilee         | 33.02 | 35.33 | M. Finkel , Y. Goren                        |
| HUJINVPSE 873 | Garypinidae | <i>Garypinus asper</i>    | 1 | 2022 | May     | 19 | Mt. Meiron-Hurfeish                   | Upper Galilee         | 33.02 | 35.33 | M. Finkel , Y. Goren                        |
| HUJINVPSE 876 | Garypinidae | <i>Garypinus asper</i>    | 1 | 2022 | May     | 1  | Mt. Meiron-Hurfeish                   | Upper Galilee         | 33.02 | 35.33 | M. Finkel , Y. Goren                        |
| HUJINVPSE 877 | Garypinidae | <i>Garypinus asper</i>    | 1 | 2022 | May     | 1  | Mt. Meiron-Hurfeish                   | Upper Galilee         | 33.02 | 35.33 | M. Finkel , Y. Goren                        |
| HUJINVPSE 879 | Garypinidae | <i>Garypinus asper</i>    | 1 | 2022 | May     | 1  | Mt. Meiron-Hurfeish                   | Upper Galilee         | 33.02 | 35.33 | M. Finkel , Y. Goren                        |



|               |             |                             |   |      |           |    |                                 |                 |       |       |                               |
|---------------|-------------|-----------------------------|---|------|-----------|----|---------------------------------|-----------------|-------|-------|-------------------------------|
| HUJINVPSE 881 | Garypinidae | <i>Garypinus asper</i>      | 1 | 2022 | May       | 1  | Mt. Meiron-Hurfeish             | Upper Galilee   | 33.02 | 35.33 | M. Finkel , Y. Goren          |
| HUJINVPSE 882 | Garypinidae | <i>Garypinus asper</i>      | 1 | 2022 | May       | 9  | Mt. Meiron-Hurfeish             | Upper Galilee   | 33.02 | 35.33 | M. Finkel , Y. Goren          |
| HUJINVPSE 887 | Garypinidae | <i>Garypinus asper</i>      | 1 | 2022 | May       | 1  | Mt. Meiron-Hurfeish             | Upper Galilee   | 33.02 | 35.33 | M. Finkel , Y. Goren          |
| HUJINVPSE 893 | Garypinidae | <i>Garypinus asper</i>      | 1 | 2022 | June      | 20 | Mt. Meiron-Hurfeish             | Upper Galilee   | 33.02 | 35.33 | M. Finkel , Y. Goren          |
| HUJINVPSE 583 | Garypinidae | <i>Garypinus asper</i>      | 3 | 2017 | June      | 10 | N. Carmel                       | Carmel          | 32.57 | 35.06 | E. Gavish Regev et al.        |
| HUJINVPSE 731 | Garypinidae | <i>Garypinus asper</i>      | 2 |      |           |    | Sefunim cave                    | Carmel          | 32.74 | 34.98 | Aharon S.                     |
| HUJINVPSE 874 | Garypinidae | <i>Garypinus asper</i>      | 1 | 2022 | May       | 28 | Mt. Meiron-Hurfeish             | Upper Galilee   | 33.02 | 35.33 | M. Finkel , Y. Goren          |
| HUJINVPSE 875 | Garypinidae | <i>Garypinus asper</i>      | 1 | 2022 | May       | 28 | Mt. Meiron-Hurfeish             | Upper Galilee   | 33.02 | 35.33 | M. Finkel , Y. Goren          |
| HUJINVPSE 880 | Garypinidae | <i>Garypinus asper</i>      | 1 | 2022 | May       | 1  | Mt. Meiron-Hurfeish             | Upper Galilee   | 33.02 | 35.33 | M. Finkel , Y. Goren          |
| HUJINVPSE 892 | Garypinidae | <i>Garypinus asper</i>      | 1 | 2022 | June      | 30 | Mt. Meiron-Hurfeish             | Upper Galilee   | 33.02 | 35.33 | M. Finkel , Y. Goren          |
| HUJINVPSE 896 | Garypinidae | <i>Garypinus asper</i>      | 1 | 2022 | June      | 30 | Mt. Meiron-Hurfeish             | Upper Galilee   | 33.02 | 35.33 | M. Finkel , Y. Goren          |
| HUJINVPSE 897 | Garypinidae | <i>Garypinus asper</i>      | 1 | 2022 | June      | 20 | Mt. Meiron-Hurfeish             | Upper Galilee   | 33.02 | 35.33 | M. Finkel , Y. Goren          |
| HUJINVPSE 898 | Garypinidae | <i>Garypinus asper</i>      | 1 | 2022 | June      | 20 | Mt. Meiron-Humema               | Upper Galilee   | 33.01 | 35.4  | M. Finkel , Y. Goren          |
| HUJINVPSE 932 | Garypinidae | <i>Garypinus asper</i>      | 2 | 2022 | October   | 27 | Tel Sokho                       | Shfelat Yehudah | 31.64 | 34.97 | EGR, Daniel Alfred, Aharon S. |
| HUJINVPSE 319 | Garypinidae | <i>Garypinus dimidiatus</i> | 1 | 1961 | September | 22 | Mt. Meron, 2 km north to Jermak | Galil           | 32.99 | 35.41 |                               |
| HUJINVPSE 249 | Garypinidae | <i>Garypinus dimidiatus</i> | 1 | 1967 | April     | 12 | Nahal Bezet                     | Galil           | 33.07 | 35.2  | Levy G. L.                    |
| HUJINVPSE 581 | Garypinidae | <i>Garypinus dimidiatus</i> | 1 | 2017 | June      | 9  | Bar'am Froset                   | Galil           | 33.04 | 35.41 | E. Gavish Regev et al.        |
| HUJINVPSE 582 | Garypinidae | <i>Garypinus dimidiatus</i> | 1 | 2017 | June      | 9  | Nahal Bezet                     | Galil           | 33.07 | 35.2  | E. Gavish Regev et al.        |
| HUJINVPSE 304 | Garypinidae | <i>Garypinus dimidiatus</i> | 1 | 1961 | May       | 26 | Zikhron Ya'aqov                 | Carmel          | 32.56 | 34.94 | Amitai P. A.                  |
| HUJINVPSE 587 | Garypinidae | <i>Garypinus dimidiatus</i> | 9 | 2017 | June      | 10 | Nahal Oren                      | Carmel          | 32.72 | 34.98 | E. Gavish Regev et al.        |
| HUJINVPSE 446 | Garypinidae | <i>Garypinus dimidiatus</i> | 1 | 1968 | March     | 4  | Nahal Sha'ar                    | Samaria         | 32.12 | 35.06 | Costa M. C.                   |
| HUJINVPSE 99  | Garypinidae | <i>Garypinus dimidiatus</i> | 1 | 1939 | December  |    | Kiryat Anavim                   | Judea           | 31.81 | 35.12 |                               |
| HUJINVPSE 104 | Garypinidae | <i>Garypinus dimidiatus</i> | 1 | 1943 | March     | 31 | Aqua Bella (En Hemed)           | Judea           | 31.8  | 35.13 |                               |
| HUJINVPSE 340 | Garypinidae | <i>Garypinus dimidiatus</i> | 1 | 1961 | May       | 25 | Motza (km.7)                    | Judea           | 31.79 | 35.17 | Amitai P. A.                  |
| HUJINVPSE 344 | Garypinidae | <i>Garypinus dimidiatus</i> | 1 | 1961 | August    | 17 | Spring of Motza                 | Judea           | 31.79 | 35.17 | Amitai P. A.                  |
| HUJINVPSE 368 | Garypinidae | <i>Garypinus dimidiatus</i> | 1 | 1961 | August    | 17 | Spring of Motza                 | Judea           | 31.79 | 35.17 | Amitai P. A.                  |
| HUJINVPSE 588 | Garypinidae | <i>Garypinus dimidiatus</i> | 1 | 2017 | June      | 19 | Soreq Nature Reserve            | Judea           | 31.36 | 35.08 | E. Gavish Regev et al.        |
| HUJINVPSE 591 | Garypinidae | <i>Garypinus dimidiatus</i> | 1 | 2017 | June      | 19 | Nahal Ktalav                    | Judea           | 31.99 | 35.42 | E. Gavish Regev et al.        |
| HUJINVPSE 712 | Garypinidae | <i>Garypinus dimidiatus</i> | 1 | 2017 | June      | 19 | Soreq Nature Reserve            | Judea           | 31.36 | 35.08 | E. Gavish Regev et al.        |
| HUJINVPSE 767 | Garypinidae | <i>Garypinus</i>            | 2 | 2017 | June      | 19 | Hirbat Sa'adim                  | Judea           | 31.75 | 35.13 | E. Gavish                     |

|               |                    |                                                            |   |      |          |    |  |                                      |                              |       |       |                                      |
|---------------|--------------------|------------------------------------------------------------|---|------|----------|----|--|--------------------------------------|------------------------------|-------|-------|--------------------------------------|
| HUJINVPSE 105 | Garypinidae        | <i>dimidiatus</i><br><i>Garypinus</i><br><i>dimidiatus</i> | 1 |      |          |    |  | Wadi Lifta,<br>Jerusalem             | Judea                        | 31.79 | 35.2  | Regev et al.                         |
| HUJINVPSE 303 | Geogarypid<br>ae   | <i>Geogarypus pulcher</i>                                  | 2 | 1966 | April    | 1  |  | Hula                                 | Hula valley                  | 33.07 | 35.6  | Margalith J.<br>M.                   |
| HUJINVPSE 857 | Geogarypid<br>ae   | <i>Geogarypus pulcher</i>                                  | 1 | 2022 | June     | 3  |  | Mt. Meiron-<br>Hurfeish              | Upper<br>Galilee             | 33.02 | 35.33 | M. Finkel ,<br>Y. Goren              |
| HUJINVPSE 868 | Geogarypid<br>ae   | <i>Geogarypus pulcher</i>                                  | 1 | 2022 | May      | 19 |  | Mt. Meiron-<br>Hurfeish              | Upper<br>Galilee             | 33.02 | 35.33 | M. Finkel ,<br>Y. Goren              |
| HUJINVPSE 872 | Geogarypid<br>ae   | <i>Geogarypus pulcher</i>                                  | 1 | 2022 | May      | 19 |  | Mt. Meiron-<br>Hurfeish              | Upper<br>Galilee             | 33.02 | 35.33 | M. Finkel ,<br>Y. Goren              |
| HUJINVPSE 878 | Geogarypid<br>ae   | <i>Geogarypus pulcher</i>                                  | 1 | 2022 | May      | 1  |  | Mt. Meiron-<br>Hurfeish              | Upper<br>Galilee             | 33.02 | 35.33 | M. Finkel ,<br>Y. Goren              |
| HUJINVPSE 884 | Geogarypid<br>ae   | <i>Geogarypus pulcher</i>                                  | 1 | 2022 | May      | 1  |  | Mt. Meiron-<br>Hurfeish              | Upper<br>Galilee             | 33.02 | 35.33 | M. Finkel ,<br>Y. Goren              |
| HUJINVPSE 886 | Geogarypid<br>ae   | <i>Geogarypus pulcher</i>                                  | 1 | 2022 | May      | 1  |  | Mt. Meiron-<br>Hurfeish              | Upper<br>Galilee             | 33.02 | 35.33 | M. Finkel ,<br>Y. Goren              |
| HUJINVPSE 463 | Geogarypid<br>ae   | <i>Geogarypus pulcher</i>                                  | 1 | 1968 | February | 2  |  | Carmel                               | Carmel                       | 32.73 | 35.04 | Costa M. C.                          |
| HUJINVPSE 299 | Geogarypid<br>ae   | <i>Geogarypus pulcher</i>                                  | 1 | 1965 | November | 1  |  | K'far Masarik                        | Northern<br>coastal<br>Plain | 32.89 | 35.1  | Margalith J.<br>M.                   |
| HUJINVPSE 455 | Geogarypid<br>ae   | <i>Geogarypus pulcher</i>                                  | 1 | 1965 | March    | 19 |  | Gan Sh'muel                          | Coastal<br>plain-<br>Center  | 32.45 | 34.95 |                                      |
| HUJINVPSE 107 | Geogarypid<br>ae   | <i>Geogarypus pulcher</i>                                  | 1 | 1957 | August   | 1  |  | Bet Meir                             | Judea                        | 31.79 | 35.04 | Wahrman J.<br>W.                     |
| HUJINVPSE 928 | Geogarypid<br>ae   | <i>Geogarypus shulovi</i>                                  | 2 | 2022 | October  | 22 |  | Snir                                 | Galilee                      | 33.24 | 35.67 | Chipman<br>A.D.,<br>Edgecomb<br>G.D. |
| HUJINVPSE 815 | Geogarypid<br>ae   | <i>Geogarypus shulovi</i>                                  | 1 | 2022 | April    | 2  |  | Ramot Menashe                        | Carmel                       | 32.6  | 35.06 | Topper A.                            |
| HUJINVPSE 111 | Geogarypid<br>ae   | <i>Geogarypus shulovi</i>                                  | 1 | 1941 | March    | 24 |  | Arab Sajada ('En<br>Nutra)           | Galil                        | 33.08 | 35.64 | Shulov A.                            |
| HUJINVPSE 112 | Geogarypid<br>ae   | <i>Geogarypus shulovi</i>                                  | 1 | 1945 | March    | 13 |  | Dalia                                | Samaria                      | 32.59 | 35.07 | Shulov A.                            |
| HUJINVPSE 268 | Hesperolpii<br>dae | <i>Calocheirus atopus</i>                                  | 1 | 1961 | May      | 13 |  | Tel Hazor                            | Galil                        | 33.02 | 35.57 | Amitai P.<br>A.                      |
| HUJINVPSE 357 | Hesperolpii<br>dae | <i>Calocheirus atopus</i>                                  | 1 | 1961 | May      | 13 |  | Tel Hazor                            | Galil                        | 33.02 | 35.57 | Amitai P.<br>A.                      |
| HUJINVPSE 508 | Hesperolpii<br>dae | <i>Calocheirus atopus</i>                                  | 1 | 1961 | August   | 30 |  | Lahav                                | Negev                        | 31.38 | 34.86 | Freund D.<br>F.                      |
| HUJINVPSE 702 | Hesperolpii<br>dae | <i>Calocheirus atopus</i>                                  | 1 | 1963 | April    | 28 |  | Lahav                                | Negev                        | 31.38 | 34.86 | Levy G. L.                           |
| HUJINVPSE 926 | Hesperolpii<br>dae | <i>Calocheirus atopus</i>                                  | 1 | 2022 | August   | 16 |  | Nahal Socho                          | Shfelat<br>Yehudah           | 31.63 | 34.97 | EGR, PPS,<br>GG                      |
| HUJINVPSE 488 | Hesperolpii<br>dae | <i>Calocheirus atopus</i>                                  | 1 | 1970 | November | 16 |  | Wadi Daraje                          | Judea                        | 31.59 | 35.37 | Tsabar G.<br>T.                      |
| HUJINVPSE 468 | Hesperolpii<br>dae | <i>Calocheirus atopus</i>                                  | 1 | 1974 | April    | 30 |  | Ma'ale Adomim                        | Judea                        | 31.78 | 35.3  | Tsabar G.<br>T.                      |
| HUJINVPSE 509 | Hesperolpii<br>dae | <i>Calocheirus atopus</i>                                  | 1 | 1974 | April    | 30 |  | Ma'ale Adomim                        | Judea                        | 31.78 | 35.3  | Tsabar G.<br>T.                      |
| HUJINVPSE 705 | Hesperolpii<br>dae | <i>Calocheirus atopus</i>                                  | 1 | 1963 | April    | 10 |  | N. Gerar (Brosh)                     | Negev                        | 31.38 | 34.63 | Levy G. L.                           |
| HUJINVPSE 842 | Hesperolpii<br>dae | <i>Calocheirus atopus</i>                                  | 1 | 2022 | May      | 17 |  | Sayeret Shaked<br>Park (near Ofakim) | Negev-<br>West               | 31.28 | 34.65 | Peleg<br>Jakubovits                  |
| HUJINVPSE 351 | Hesperolpii<br>dae | <i>Calocheirus atopus</i>                                  | 1 | 1961 | April    | 30 |  | Ben Shemen                           | Shfelat<br>Yehudah           | 31.96 | 34.92 | Amitai P.<br>A.                      |
| HUJINVPSE 469 | Hesperolpii        |                                                            | 1 | 1968 | May      | 4  |  | Mt. Hermon,                          | Hermon                       | 33.32 | 35.78 | Costa M. C.                          |

|               | dae         |                            |    |      |          |    | 1800m                                    |                        |       |       |                      |
|---------------|-------------|----------------------------|----|------|----------|----|------------------------------------------|------------------------|-------|-------|----------------------|
| HUJINVPSE 272 | Menthidae   | <i>Paramenthus shulovi</i> | 1  | 1967 | May      | 4  | Jerusalem                                | Judea                  | 31.77 | 35.21 | Nitzan M. N.         |
| HUJINVPSE 522 | Neobisiidae | <i>Neobisium validum</i>   | 23 | 1965 | December | 23 | Nahal Amud                               | Galil                  | 32.97 | 35.47 | Costa M. C.          |
| HUJINVPSE 277 | Neobisiidae | <i>Neobisium validum</i>   | 1  | 1975 | April    | 6  | Kefar Giladi                             | Galil                  | 33.24 | 35.57 | Amitai P. A.         |
| HUJINVPSE 597 | Neobisiidae | <i>Neobisium validum</i>   | 1  | 2021 | January  | 3  | Nahal Kziv                               | Galilee                | 33.04 | 35.27 | Finkel Meiri         |
| HUJINVPSE 598 | Neobisiidae | <i>Neobisium validum</i>   | 1  | 2021 | January  | 3  | Nahal Kziv                               | Galilee                | 33.04 | 35.27 | Finkel Meiri         |
| HUJINVPSE 599 | Neobisiidae | <i>Neobisium validum</i>   | 1  | 2021 | January  | 3  | Nahal Kziv                               | Galilee                | 33.04 | 35.27 | Finkel Meiri         |
| HUJINVPSE 864 | Neobisiidae | <i>Neobisium validum</i>   | 1  | 2022 | April    | 14 | Mt. Meiron-Humema                        | Upper Galilee          | 33.01 | 35.4  | M. Finkel , Y. Goren |
| HUJINVPSE 342 | Neobisiidae | <i>Neobisium validum</i>   | 1  | 1961 | May      | 12 | Mount Tavor                              | Galil                  | 32.69 | 35.39 | Amitai P. A.         |
| HUJINVPSE 355 | Neobisiidae | <i>Neobisium validum</i>   | 1  | 1967 | April    | 23 | Bet Oren                                 | Carmel                 | 32.73 | 35.01 | Amitai P. A.         |
| HUJINVPSE 358 | Neobisiidae | <i>Neobisium validum</i>   | 1  | 1972 | January  | 1  | Carmel                                   | Carmel                 | 32.74 | 35.03 | Weisberg I. W.       |
| HUJINVPSE 380 | Neobisiidae | <i>Neobisium validum</i>   | 1  | 1972 | January  | 1  | Carmel                                   | Carmel                 | 32.74 | 35.03 | Weisberg I. W.       |
| HUJINVPSE 230 | Neobisiidae | <i>Neobisium validum</i>   | 1  | 1976 | March    | 31 | Carmel: 40' Oaks grove                   | Carmel                 | 32.76 | 35.03 | Warburg M. W.        |
| HUJINVPSE 360 | Neobisiidae | <i>Neobisium validum</i>   | 1  | 1964 | February | 8  | Rosh Ha'nikra                            | Northern coastal Plain | 33.09 | 35.12 | Levanoni U. L.       |
| HUJINVPSE 541 | Neobisiidae | <i>Neobisium validum</i>   | 2  | 1966 | December | 7  | Rosh Hanikra                             | Northern Coastal Plain | 33.09 | 35.11 | Costa M. C.          |
| HUJINVPSE 117 | Neobisiidae | <i>Neobisium validum</i>   | 1  | 1937 | February | 5  | Geva                                     | Jezreel Valley         | 32.57 | 35.37 | Shulov A.            |
| HUJINVPSE 138 | Neobisiidae | <i>Neobisium validum</i>   | 1  | 1945 | December | 3  | Kfar Echezkiel                           | Jezreel Valley         | 32.57 | 35.36 | Shulov A.            |
| HUJINVPSE 253 | Neobisiidae | <i>Neobisium validum</i>   | 1  | 1965 | March    | 8  | Mishmar Ha'emek                          | Jezreel Valley         | 32.61 | 35.14 | Costa M. C.          |
| HUJINVPSE 448 | Neobisiidae | <i>Neobisium validum</i>   | 8  | 1966 | November | 13 | Allone Abba                              | Galil                  | 32.73 | 35.17 | Costa M. C.          |
| HUJINVPSE 440 | Neobisiidae | <i>Neobisium validum</i>   | 6  | 1967 | December | 8  | Tivon                                    | Jezreel valley         | 32.72 | 35.13 | Costa M. C.          |
| HUJINVPSE 443 | Neobisiidae | <i>Neobisium validum</i>   | 1  | 1967 | March    | 27 | Mishmar Ha'emek                          | Jezreel Valley         | 32.61 | 35.14 | Costa M. C.          |
| HUJINVPSE 451 | Neobisiidae | <i>Neobisium validum</i>   | 2  | 1967 | April    | 28 | Mishmar Ha'emek                          | Jezreel Valley         | 32.61 | 35.14 | Costa M. C.          |
| HUJINVPSE 459 | Neobisiidae | <i>Neobisium validum</i>   | 1  | 1967 | March    | 31 | Tivon                                    | Jezreel valley         | 32.72 | 35.13 | Costa M. C.          |
| HUJINVPSE 492 | Neobisiidae | <i>Neobisium validum</i>   | 23 | 1967 | January  | 8  | Allone Abba                              | Galil                  | 32.73 | 35.17 | Costa M. C.          |
| HUJINVPSE 683 | Neobisiidae | <i>Neobisium validum</i>   | 2  | 1967 | March    | 11 | Mishmar Ha'emek                          | Jezreel Valley         | 32.61 | 35.14 | Costa M. C.          |
| HUJINVPSE 680 | Neobisiidae | <i>Neobisium validum</i>   | 1  | 1968 | March    | 4  | Nahal Sha'ar                             | Samaria                | 32.12 | 35.06 | Costa M. C.          |
| HUJINVPSE 233 | Neobisiidae | <i>Neobisium validum</i>   | 1  | 1974 | December | 18 | Gilbo'a                                  | Samaria                | 32.49 | 35.41 | Warburg M. W.        |
| HUJINVPSE 130 | Neobisiidae | <i>Neobisium validum</i>   | 1  | 1942 | March    | 29 | Tiberias, hot spring                     | Galil                  | 32.77 | 35.55 |                      |
| HUJINVPSE 284 | Neobisiidae | <i>Neobisium validum</i>   | 1  | 1942 | March    | 5  | Rosh Ha'ayin, Ras-el 'ain (Petach Tikva) | Coastal plain-Center   | 32.08 | 34.96 | Steinitz H. S.       |
| HUJINVPSE 237 | Neobisiidae | <i>Neobisium validum</i>   | 2  | 2001 | November | 11 | Adulam Reserve                           | Judea                  | 31.64 | 34.94 | Mandelik Y. M.       |
| HUJINVPSE 774 | Neobisiidae | <i>Neobisium validum</i>   | 1  | 2022 | January  | 11 | Hazan Hills,                             | Shfelat                | 31.52 | 34.91 | Pinchevsky           |

|               |             |                          |   |      |          |    |                                      |                         |       |       |                  |
|---------------|-------------|--------------------------|---|------|----------|----|--------------------------------------|-------------------------|-------|-------|------------------|
| HUJINVPSE 775 | Neobisiidae | <i>Neobisium validum</i> | 1 | 2022 | January  | 11 | Amatzia Hazan Hills, Amatzia         | Yehudah Shfelat Yehudah | 31.52 | 34.91 | D. Pinchevsky D. |
| HUJINVPSE 777 | Neobisiidae | <i>Neobisium validum</i> | 1 | 2022 | January  | 11 | Hazan Hills, Amatzia                 | Shfelat Yehudah         | 31.52 | 34.91 | Pinchevsky D.    |
| HUJINVPSE 113 | Neobisiidae | <i>Neobisium validum</i> | 1 | 1939 | December | 15 | Qiryat Anavim                        | Judea                   | 31.81 | 35.12 |                  |
| HUJINVPSE 116 | Neobisiidae | <i>Neobisium validum</i> | 1 | 1939 | December |    | Qiryat Anavim                        | Judea                   | 31.81 | 35.12 |                  |
| HUJINVPSE 118 | Neobisiidae | <i>Neobisium validum</i> | 1 | 1943 | February | 16 | Jerusalem, Ge-Hinnom                 | Judea                   | 31.77 | 35.23 |                  |
| HUJINVPSE 119 | Neobisiidae | <i>Neobisium validum</i> | 1 | 1943 | March    | 10 | Jerusalem, near Hamkasher-Garage     | Judea                   | 31.78 | 35.2  |                  |
| HUJINVPSE 120 | Neobisiidae | <i>Neobisium validum</i> | 1 | 1943 | April    | 10 | Jerusalem, Montefiori garage         | Judea                   | 31.78 | 35.22 |                  |
| HUJINVPSE 123 | Neobisiidae | <i>Neobisium validum</i> | 1 | 1943 | March    | 10 | Jerusalem, near Home for the blind   | Judea                   | 31.79 | 35.2  |                  |
| HUJINVPSE 125 | Neobisiidae | <i>Neobisium validum</i> | 1 | 1943 | November | 6  | Jerusalem, Yefe-Nof,                 | Judea                   | 31.78 | 35.18 |                  |
| HUJINVPSE 129 | Neobisiidae | <i>Neobisium validum</i> | 1 | 1943 | January  | 9  | Jerusalem, Ge-Hinnom                 | Judea                   | 31.77 | 35.23 |                  |
| HUJINVPSE 114 | Neobisiidae | <i>Neobisium validum</i> | 1 | 1944 | March    | 6  | Bittir to Ras Abu Ammar              | Judea                   | 31.73 | 35.11 |                  |
| HUJINVPSE 115 | Neobisiidae | <i>Neobisium validum</i> | 1 | 1944 | December | 2  | Nahal Revida (=Wadi Ruwas)           | Judea                   | 31.78 | 35.17 |                  |
| HUJINVPSE 133 | Neobisiidae | <i>Neobisium validum</i> | 1 | 1944 | January  | 7  | Betlehem                             | Judea                   | 31.71 | 35.2  | Haas G. H.       |
| HUJINVPSE 141 | Neobisiidae | <i>Neobisium validum</i> | 1 | 1944 | February | 2  | Nahal Revida (=Wadi Ruwas)           | Judea                   | 31.78 | 35.17 | Haas G. H.       |
| HUJINVPSE 142 | Neobisiidae | <i>Neobisium validum</i> | 1 | 1944 | November | 25 | Jerusalem                            | Judea                   | 31.77 | 35.21 | Shulov A.        |
| HUJINVPSE 144 | Neobisiidae | <i>Neobisium validum</i> | 1 | 1944 | February | 5  | Wadi Sarar                           | Judea                   | 31.81 | 34.87 | Haas G. H.       |
| HUJINVPSE 246 | Neobisiidae | <i>Neobisium validum</i> | 2 | 1944 | January  | 28 | Qiryat Anavim                        | Judea                   | 31.81 | 35.12 | Steinitz H. S.   |
| HUJINVPSE 126 | Neobisiidae | <i>Neobisium validum</i> | 1 | 1945 | December | 22 | Jerusalem                            | Judea                   | 31.77 | 35.21 |                  |
| HUJINVPSE 248 | Neobisiidae | <i>Neobisium validum</i> | 2 | 1946 | March    | 23 | Jerusalem, Ha'matzleva Valley        | Judea                   | 31.77 | 35.21 | Steinitz H. S.   |
| HUJINVPSE 140 | Neobisiidae | <i>Neobisium validum</i> | 1 | 1947 | February | 6  | Kfar Ezion                           | Judea                   | 31.65 | 35.11 | Shulov A.        |
| HUJINVPSE 131 | Neobisiidae | <i>Neobisium validum</i> | 1 | 1949 | December | 15 | Jerusalem                            | Judea                   | 31.77 | 35.21 |                  |
| HUJINVPSE 135 | Neobisiidae | <i>Neobisium validum</i> | 1 | 1949 | December | 17 | Qiryat Anavim                        | Judea                   | 31.77 | 35.21 |                  |
| HUJINVPSE 128 | Neobisiidae | <i>Neobisium validum</i> | 1 | 1950 | December | 1  | Jerusalem                            | Judea                   | 31.77 | 35.21 |                  |
| HUJINVPSE 132 | Neobisiidae | <i>Neobisium validum</i> | 1 | 1950 | March    | 13 | Jerusalem                            | Judea                   | 31.77 | 35.21 |                  |
| HUJINVPSE 136 | Neobisiidae | <i>Neobisium validum</i> | 1 | 1950 | December | 1  | Jerusalem                            | Judea                   | 31.77 | 35.21 |                  |
| HUJINVPSE 139 | Neobisiidae | <i>Neobisium validum</i> | 1 | 1950 | December | 1  | Jerusalem                            | Judea                   | 31.77 | 35.21 |                  |
| HUJINVPSE 145 | Neobisiidae | <i>Neobisium validum</i> | 1 | 1950 | April    | 1  | Jerusalem                            | Judea                   | 31.77 | 35.21 |                  |
| HUJINVPSE 146 | Neobisiidae | <i>Neobisium validum</i> | 1 | 1950 | December | 1  | Jerusalem                            | Judea                   | 31.77 | 35.21 |                  |
| HUJINVPSE 121 | Neobisiidae | <i>Neobisium validum</i> | 1 | 1952 | January  | 15 | Aqua Bella (En Hemed)                | Judea                   | 31.8  | 35.13 | Feldman          |
| HUJINVPSE 124 | Neobisiidae | <i>Neobisium validum</i> | 1 | 1958 | January  | 13 | Jerusalem                            | Judea                   | 31.77 | 35.21 | Slavin S. S.     |
| HUJINVPSE 127 | Neobisiidae | <i>Neobisium validum</i> | 1 | 1958 | January  | 13 | Jerusalem                            | Judea                   | 31.77 | 35.21 | Pener M. P.      |
| HUJINVPSE 137 | Neobisiidae | <i>Neobisium validum</i> | 1 | 1959 | December | 29 | Hirbat Sa'adim (Hirbet Qaryet Saide) | Judea                   | 31.75 | 35.13 | Yarkoni          |

|               |              |                                   |   |      |          |    |                                         |                      |       |       |                           |
|---------------|--------------|-----------------------------------|---|------|----------|----|-----------------------------------------|----------------------|-------|-------|---------------------------|
| HUJINVPSE 239 | Neobisiidae  | <i>Neobisium validum</i>          | 1 | 1963 | April    | 19 | Jerusalem                               | Judea                | 31.77 | 35.21 |                           |
| HUJINVPSE 549 | Neobisiidae  | <i>Neobisium validum</i>          | 2 | 1964 | January  | 9  | Hirbat Sa'adim<br>(Hirbet Qaryet Saide) | Judea                | 31.75 | 35.13 | Katznelson                |
| HUJINVPSE 312 | Neobisiidae  | <i>Neobisium validum</i>          | 1 | 1965 | December |    | Bar Giora                               | Judea                | 31.73 | 35.06 |                           |
| HUJINVPSE 309 | Neobisiidae  | <i>Neobisium validum</i>          | 1 | 1966 | April    | 13 | Mavo Beitar                             | Judea                | 31.72 | 35.11 |                           |
| HUJINVPSE 264 | Neobisiidae  | <i>Neobisium validum</i>          | 1 | 1967 | May      | 5  | Jerusalem                               | Judea                | 31.77 | 35.21 | Tsabar G. T.              |
| HUJINVPSE 336 | Neobisiidae  | <i>Neobisium validum</i>          | 1 | 1967 | January  | 30 | Bar Giora                               | Judea                | 31.73 | 35.06 | Zinner H. Z.              |
| HUJINVPSE 347 | Neobisiidae  | <i>Neobisium validum</i>          | 1 | 1970 | January  | 10 | Jerusalem                               | Judea                | 31.77 | 35.21 | Shalmon B. S.             |
| HUJINVPSE 363 | Neobisiidae  | <i>Neobisium validum</i>          | 1 | 1970 | January  | 10 | Jerusalem                               | Judea                | 31.77 | 35.21 | Shalmon B. S.             |
| HUJINVPSE 370 | Neobisiidae  | <i>Neobisium validum</i>          | 1 | 1970 | January  | 10 | Jerusalem                               | Judea                | 31.77 | 35.21 | Shalmon B. S.             |
| HUJINVPSE 270 | Neobisiidae  | <i>Neobisium validum</i>          | 1 | 1981 | December | 5  | Jerusalem                               | Judea                | 31.77 | 35.21 | Levy G. L.                |
| HUJINVPSE 476 | Neobisiidae  | <i>Neobisium validum</i>          | 1 | 1982 | November | 25 | Jerusalem                               | Judea                | 31.77 | 35.21 | Amitai P. A.              |
| HUJINVPSE 505 | Neobisiidae  | <i>Neobisium validum</i>          | 1 | 1982 | December | 15 | Bet Zayit                               | Judea                | 31.78 | 35.16 | Avital E. A.              |
| HUJINVPSE 254 | Neobisiidae  | <i>Neobisium validum</i>          | 3 | 2001 | November | 11 | Sansan Reserve                          | Judea                | 31.69 | 35.06 | Mandelik Y. M.            |
| HUJINVPSE 386 | Neobisiidae  | <i>Neobisium validum</i>          | 2 | 1972 | February | 17 | Dorot-Ruhama                            | Negev                | 31.49 | 34.67 | Weisberg I. W.            |
| HUJINVPSE 281 | Neobisiidae  | <i>Neobisium validum</i>          | 1 | 1964 | November | 30 | Yeruham                                 | Negev                | 30.99 | 34.91 | Bloud & White             |
| HUJINVPSE 753 | Neobisiidae  | <i>Neobisium validum</i>          | 1 | 2022 | February | 18 | Bor Hemet                               | Negev                | 30.59 | 34.71 | Harms D., EGR,            |
| HUJINVPSE 754 | Neobisiidae  | <i>Neobisium validum</i>          | 1 | 2022 | February | 18 | Bor Hemet                               | Negev                | 30.59 | 34.71 | Warburg S. Harms D., EGR, |
| HUJINVPSE 234 | Neobisiidae  | <i>Neobisium validum</i>          | 5 | 1998 | January  |    | Ramat Magshimim                         | Golan                | 32.85 | 35.81 | Warburg I.W.              |
| HUJINVPSE 122 | Neobisiidae  | <i>Neobisium validum</i>          | 1 | 1939 | December | 9  |                                         |                      |       |       |                           |
| HUJINVPSE 134 | Neobisiidae  | <i>Neobisium validum</i>          | 1 | 1945 | March    | 6  |                                         |                      |       |       | J. Bek                    |
| HUJINVPSE 143 | Neobisiidae  | <i>Neobisium validum</i>          | 1 |      |          |    |                                         |                      |       |       |                           |
| HUJINVPSE 945 | Neobisioidae |                                   | 1 | 2023 | January  | 19 | Sussita cave                            | Golan                | 32.78 | 35.66 | Pavlek M.                 |
| HUJINVPSE 94  | Olpiidae     | <i>Calocheiridius libanoticus</i> | 1 | 1944 | March    | 2  | Elon - Wadi Karkara                     | Galil                | 33.07 | 35.22 | Haas G. H.                |
| HUJINVPSE 98  | Olpiidae     | <i>Calocheiridius libanoticus</i> | 1 | ?    | March    | 20 | Sh'fia                                  | Carmel               | 32.59 | 34.97 |                           |
| HUJINVPSE 101 | Olpiidae     | <i>Calocheiridius libanoticus</i> | 1 | 1938 | March    | 12 | Degania                                 | Galil                | 32.71 | 35.57 |                           |
| HUJINVPSE 102 | Olpiidae     | <i>Calocheiridius libanoticus</i> | 1 | 1939 | March    | 8  | Avichail                                | Coastal plain center | 32.35 | 34.87 | Shulov A.                 |
| HUJINVPSE 100 | Olpiidae     | <i>Calocheiridius libanoticus</i> | 1 | 1944 | March    | 16 | Kfar Mallal                             | Coastal plain-Center | 32.17 | 34.89 | Moskona                   |
| HUJINVPSE 96  | Olpiidae     | <i>Calocheiridius libanoticus</i> | 1 | 1942 | December | 24 | Eichenwald south of Hebron              | Judea                | 31.5  | 35.13 |                           |
| HUJINVPSE 95  | Olpiidae     | <i>Calocheiridius libanoticus</i> | 1 | 1954 | June     | 28 | Jerusalem                               | Judea                | 31.77 | 35.21 |                           |
| HUJINVPSE 97  | Olpiidae     | <i>Calocheiridius libanoticus</i> | 1 | 1959 | October  | 29 | Qiryat Anavim                           | Judea                | 31.81 | 35.12 | Pener M. P.               |

|               |          |                                         |    |      |           |       |                                   |                  |       |       |                 |
|---------------|----------|-----------------------------------------|----|------|-----------|-------|-----------------------------------|------------------|-------|-------|-----------------|
| HUJINVPSE 103 | Olpiidae | <i>Calocheiridius libanoticus</i>       | 1  | 1946 | April     |       | Mahtesh Ramon                     | Negev Central    | 30.59 | 34.84 | Shulov A.       |
| HUJINVPSE 947 | Olpiidae | <i>Calocheiridius libanoticus</i>       | 1  | 2018 | July      | 19    | Haruva cave                       | Judea            | 31.91 | 34.96 | Aharon S.       |
| HUJINVPSE 595 | Olpiidae | <i>Halominniza aegyptiaca litoralis</i> | 1  | 2019 | May       | 13-16 | N. Ashalim lower                  | Dead Sea         | 31.07 | 35.31 | A. Gera         |
| HUJINVPSE 212 | Olpiidae | <i>Halominniza aegyptiaca litoralis</i> | 1  | 1941 | February  | 23    | Bet-HaArava, Near, Bank Of Jordan | Dead Sea         | 31.8  | 35.5  | Shulov A.       |
| HUJINVPSE 209 | Olpiidae | <i>Halominniza aegyptiaca litoralis</i> | 1  | 1957 | August    | 16    | Sedom                             | Dead Sea         | 31.09 | 35.4  | Wahrman J. W.   |
| HUJINVPSE 421 | Olpiidae | <i>Halominniza aegyptiaca litoralis</i> | 1  | 1970 | April     | 9     | Kalia                             | Dead Sea         | 31.73 | 35.49 | Faunistics      |
| HUJINVPSE 210 | Olpiidae | <i>Halominniza aegyptiaca litoralis</i> | 2  | 1957 | January   | 15    | Elat                              | Arava            | 29.56 | 34.97 | Ginsburg        |
| HUJINVPSE 494 | Olpiidae | <i>Halominniza aegyptiaca litoralis</i> | 20 | 1974 | June      | 14    | Elat, Solar pond                  | Arava            | 29.56 | 34.97 | Dubinsky Z. D.  |
| HUJINVPSE 493 | Olpiidae | <i>Halominniza aegyptiaca litoralis</i> | 4  | 1981 | August    | 15    | Elat, Solar pond                  | Arava            | 29.56 | 34.97 | Dubinsky Z. D.  |
| HUJINVPSE 707 | Olpiidae | <i>Halominniza aegyptiaca litoralis</i> | 1  | 1946 | April     | 21    |                                   |                  |       |       | Steinitz H. S.  |
| HUJINVPSE 194 | Olpiidae | <i>Minniza lindbergi</i>                | 1  | 1941 | April     | 20    | El Hamma                          | Golan            | 32.69 | 35.66 | Salz-Bytinski   |
| HUJINVPSE 151 | Olpiidae | <i>Minniza lindbergi</i>                | 1  | 1940 | June      | 7     | Jerusalem                         | Judea            | 31.77 | 35.21 |                 |
| HUJINVPSE 164 | Olpiidae | <i>Minniza lindbergi</i>                | 1  | 1953 | May       | 19    | Jerusalem                         | Judea            | 31.77 | 35.21 |                 |
| HUJINVPSE 147 | Olpiidae | <i>Minniza lindbergi</i>                | 1  | 1954 | September | 30    | Jerusalem                         | Judea            | 31.77 | 35.21 |                 |
| HUJINVPSE 192 | Olpiidae | <i>Minniza lindbergi</i>                | 1  | 1954 | June      | 28    | Jerusalem                         | Judea            | 31.77 | 35.21 |                 |
| HUJINVPSE 168 | Olpiidae | <i>Minniza lindbergi</i>                | 1  | 1959 | May       | 23    | Liffta                            | Judea            | 31.79 | 35.2  | Rosen           |
| HUJINVPSE 149 | Olpiidae | <i>Minniza lindbergi</i>                | 1  | 1922 | October   | 13    | Jericho                           | Dead Sea         | 31.87 | 35.46 | Buxton P. A. B. |
| HUJINVPSE 155 | Olpiidae | <i>Minniza lindbergi</i>                | 1  | 1939 | February  | 14    | Jericho                           | Dead Sea         | 31.87 | 35.46 |                 |
| HUJINVPSE 157 | Olpiidae | <i>Minniza lindbergi</i>                | 1  | 1944 | April     | 21    | Between Kalia and 'En Feshkha     | Dead Sea         | 31.74 | 35.46 |                 |
| HUJINVPSE 196 | Olpiidae | <i>Minniza lindbergi</i>                | 1  | 1944 | March     | 19    | En Gedi                           | Dead Sea         | 31.47 | 35.39 |                 |
| HUJINVPSE 161 | Olpiidae | <i>Minniza lindbergi</i>                | 1  | 1957 | March     | 25    | En Gedi sulphuric springs         | Dead Sea         | 31.47 | 35.39 | Shulov A.       |
| HUJINVPSE 169 | Olpiidae | <i>Minniza lindbergi</i>                | 1  | 1957 | August    | 18    | En Gedi                           | Dead Sea         | 31.47 | 35.39 | Wahrman J. W.   |
| HUJINVPSE 187 | Olpiidae | <i>Minniza lindbergi</i>                | 1  | 1957 | August    | 16    | En Gedi                           | Dead Sea         | 31.47 | 35.39 | Wahrman J. W.   |
| HUJINVPSE 190 | Olpiidae | <i>Minniza lindbergi</i>                | 1  | 1958 | July      | 25    | En Boqeq                          | Dead Sea         | 31.2  | 35.36 | Shulov A.       |
| HUJINVPSE 162 | Olpiidae | <i>Minniza lindbergi</i>                | 1  | 1961 | June      | 3     | En Gev                            | Galil            | 32.79 | 35.64 | Katznelson      |
| HUJINVPSE 148 | Olpiidae | <i>Minniza lindbergi</i>                | 1  | 1947 | March     | 18    | Wadi Fukra                        | Negev - Arava    | 30.95 | 35.28 |                 |
| HUJINVPSE 153 | Olpiidae | <i>Minniza lindbergi</i>                | 1  | 1947 | March     | 19    | Ein Moslo                         | Negev - Arava    | 30.66 | 35.18 | Shulov A.       |
| HUJINVPSE 175 | Olpiidae | <i>Minniza lindbergi</i>                | 1  | 1947 | March     | 20    | Nahal Timna                       | Arava            | 29.81 | 35    | Shulov A.       |
| HUJINVPSE 170 | Olpiidae | <i>Minniza lindbergi</i>                | 1  | 1954 | May       | 1     | Arava Road, Km. 32                | Arava            | 29.69 | 34.99 | Wahrman J. W.   |
| HUJINVPSE 193 | Olpiidae | <i>Minniza lindbergi</i>                | 1  | 1947 | March     | 17    | Mamshit                           | Negev            | 31.03 | 35.07 |                 |
| HUJINVPSE 152 | Olpiidae | <i>Minniza lindbergi</i>                | 1  | 1952 | March     | 24    | Nahal Lavan                       | Negev North-West | 30.95 | 34.39 | Wahrman J. W.   |
| HUJINVPSE 172 | Olpiidae | <i>Minniza lindbergi</i>                | 1  | 1954 | March     | 22    | Be'er Sheva, 15Km S. of,          | Negev            | 31.15 | 34.8  | Haas G. H.      |
| HUJINVPSE 195 | Olpiidae | <i>Minniza lindbergi</i>                | 1  | 1949 | April     | 15    | Tel-Yeruham, 3.5Km south of       | Negev            | 30.99 | 34.91 |                 |
| HUJINVPSE 165 | Olpiidae | <i>Minniza lindbergi</i>                | 1  | 1952 | April     | 18    | Avdat, 15 Km. south of            | Negev            | 30.75 | 34.77 | Wahrman J. W.   |
| HUJINVPSE 166 | Olpiidae | <i>Minniza lindbergi</i>                | 1  | 1953 | April     | 15    | Tel-Yeruham, 3.5Km south of       | Negev            | 30.99 | 34.91 |                 |

|               |          |                           |   |      |           |        |                                |                              |       |       |                           |
|---------------|----------|---------------------------|---|------|-----------|--------|--------------------------------|------------------------------|-------|-------|---------------------------|
| HUJINVPSE 158 | Olpiidae | <i>Minniza lindbergi</i>  | 1 | 1954 | March     | 23     | Wadi Raman<br>(Nahal Ramon)    | Negev                        | 30.59 | 34.84 |                           |
| HUJINVPSE 174 | Olpiidae | <i>Minniza lindbergi</i>  | 1 | 1954 | March     | 23     | Wadi Ramon                     | Negev                        | 30.59 | 34.84 |                           |
| HUJINVPSE 184 | Olpiidae | <i>Minniza lindbergi</i>  | 1 | 1956 | March     | 15     | Wadi Ramon                     | Negev                        | 30.59 | 34.84 | Wahrman J.<br>W.          |
| HUJINVPSE 179 | Olpiidae | <i>Minniza lindbergi</i>  | 1 | 1957 | August    | 18     | Nahal Nafha                    | Negev                        | 30.73 | 34.83 | Wahrman J.<br>W.          |
| HUJINVPSE 181 | Olpiidae | <i>Minniza lindbergi</i>  | 1 | 1957 | June      | 4 to 8 | Wadi Ramon<br>(Trias)          | Negev                        | 30.59 | 34.84 | Werner                    |
| HUJINVPSE 182 | Olpiidae | <i>Minniza lindbergi</i>  | 1 | 1957 | June      | 6 to 7 | Wadi Ramon                     | Negev                        | 30.59 | 34.84 | Werner                    |
| HUJINVPSE 183 | Olpiidae | <i>Minniza lindbergi</i>  | 1 | 1957 | April     | 1      | Wadi Ramon                     | Negev                        | 30.59 | 34.84 | Yarkoni                   |
| HUJINVPSE 185 | Olpiidae | <i>Minniza lindbergi</i>  | 1 | 1957 | June      | 6 to 7 | Wadi Ramon                     | Negev                        | 30.59 | 34.84 | Werner                    |
| HUJINVPSE 186 | Olpiidae | <i>Minniza lindbergi</i>  | 1 | 1957 | June      | 6 to 7 | Wadi Ramon                     | Negev                        | 30.59 | 34.84 | Werner                    |
| HUJINVPSE 188 | Olpiidae | <i>Minniza lindbergi</i>  | 1 | 1957 | June      | 5      | Wadi Ramon                     | Negev                        | 30.59 | 34.84 | Yarkoni                   |
| HUJINVPSE 150 | Olpiidae | <i>Minniza lindbergi</i>  | 1 | 1959 | April     | 15     | Tel-Yeruham,<br>3.5Km south of | Negev<br>Central             | 30.99 | 34.91 |                           |
| HUJINVPSE 154 | Olpiidae | <i>Minniza lindbergi</i>  | 1 | 1959 | September | 15     | Tel-Yeruham,<br>3.5Km south of | Negev                        | 30.99 | 34.91 |                           |
| HUJINVPSE 156 | Olpiidae | <i>Minniza lindbergi</i>  | 1 | 1959 | April     | 15     | Tel-Yeruham,<br>3.5Km south of | Negev                        | 30.99 | 34.91 |                           |
| HUJINVPSE 159 | Olpiidae | <i>Minniza lindbergi</i>  | 1 | 1959 | April     | 15     | Tel-Yeruham,<br>3.5Km south of | Negev                        | 30.99 | 34.91 |                           |
| HUJINVPSE 160 | Olpiidae | <i>Minniza lindbergi</i>  | 1 | 1959 | April     | 15     | Tel-Yeruham,<br>3.5Km south of | Negev                        | 30.99 | 34.91 |                           |
| HUJINVPSE 171 | Olpiidae | <i>Minniza lindbergi</i>  | 1 | 1959 | April     | 30     | Avdat, 15 Km.<br>south of      | Negev                        | 30.75 | 34.77 | Wahrman J.<br>W.          |
| HUJINVPSE 176 | Olpiidae | <i>Minniza lindbergi</i>  | 1 | 1959 | April     | 30     | Nahal Nafha                    | Negev                        | 30.73 | 34.83 | Wahrman J.<br>W.          |
| HUJINVPSE 180 | Olpiidae | <i>Minniza lindbergi</i>  | 1 | 1959 | April     | 15     | Tel-Yeruham,<br>3.5Km south of | Negev                        | 30.99 | 34.91 |                           |
| HUJINVPSE 191 | Olpiidae | <i>Minniza lindbergi</i>  | 1 | 1959 | April     | 15     | Tel-Yeruham,<br>3.5Km south of | Negev                        | 30.99 | 34.91 |                           |
| HUJINVPSE 167 | Olpiidae | <i>Minniza lindbergi</i>  | 1 | 1961 | May       | 19     | Mamshit                        | Negev                        | 31.03 | 35.07 | Wahrman J.<br>W.          |
| HUJINVPSE 177 | Olpiidae | <i>Minniza lindbergi</i>  | 1 |      |           |        |                                |                              |       |       |                           |
| HUJINVPSE 201 | Olpiidae | <i>Minniza babylonica</i> | 1 | 1944 | September | 6      | Manara                         | Galil                        | 33.2  | 35.55 | Shulov A.                 |
| HUJINVPSE 247 | Olpiidae | <i>Minniza babylonica</i> | 1 | 1944 | September | 8      | Atlit                          | Northern<br>coastal<br>Plain | 32.71 | 34.94 |                           |
| HUJINVPSE 400 | Olpiidae | <i>Minniza babylonica</i> | 1 | 1967 | July      | 16     | H. el Butesha                  | Jordan<br>valley             | 32.88 | 35.64 | Amitai P.<br>A.           |
| HUJINVPSE 474 | Olpiidae | <i>Minniza babylonica</i> | 1 | 1972 | May       | 12     | Jiftlik                        | Samaria                      | 32.17 | 35.47 | Tsabar G.<br>T.           |
| HUJINVPSE 686 | Olpiidae | <i>Minniza babylonica</i> | 9 | 2019 | June      | 25     | Beith HaBeq                    | kineret lake                 | 32.89 | 35.62 | E. Gavish<br>Regev et al. |
| HUJINVPSE 276 | Olpiidae | <i>Minniza babylonica</i> | 1 | 1961 | August    | 30     | Lahav                          | Negev                        | 31.38 | 34.86 | Pener M. P.               |
| HUJINVPSE 325 | Olpiidae | <i>Minniza babylonica</i> | 1 | 1961 | August    | 30     | Lahav                          | Negev                        | 31.38 | 34.86 | Pener M. P.               |
| HUJINVPSE 259 | Olpiidae | <i>Minniza babylonica</i> | 1 | 1963 | April     | 28     | Lahav                          | Negev                        | 31.38 | 34.86 | Levy G. L.                |
| HUJINVPSE 274 | Olpiidae | <i>Minniza babylonica</i> | 1 | 1963 | April     | 28     | Lahav                          | Negev                        | 31.38 | 34.86 | Levy G. L.                |
| HUJINVPSE 708 | Olpiidae | <i>Minniza babylonica</i> | 1 | 1963 | April     | 28     | Lahav                          | Negev                        | 31.38 | 34.86 | Levy G. L.                |
| HUJINVPSE 428 | Olpiidae | <i>Minniza babylonica</i> | 2 | 2002 | March     | 22     | Adulam Reserve                 | Judea                        | 31.64 | 34.94 | Mandelik<br>Y. M.         |
| HUJINVPSE 925 | Olpiidae | <i>Minniza babylonica</i> | 1 | 2022 | August    | 16     | Nahal Socho                    | Shfelat<br>Yehudah           | 31.63 | 34.97 | EGR, PPS,<br>GG           |
| HUJINVPSE 198 | Olpiidae | <i>Minniza babylonica</i> | 1 | 1941 | December  | 10     | Jerusalem                      | Judea                        | 31.77 | 35.21 | Shulov A.                 |
| HUJINVPSE 199 | Olpiidae | <i>Minniza babylonica</i> | 1 | 1950 | November  | 8      | Bet Zayit                      | Judea                        | 31.78 | 35.16 |                           |
| HUJINVPSE 300 | Olpiidae | <i>Minniza babylonica</i> | 1 | 1961 | August    | 17     | Aqua Bella (En                 | Judea                        | 31.8  | 35.13 | Amitai P.                 |

|               |          |                           |    |      |           |    |                                       |          |       |       |                 |
|---------------|----------|---------------------------|----|------|-----------|----|---------------------------------------|----------|-------|-------|-----------------|
|               |          |                           |    |      |           |    | Hemed)                                |          |       |       | A.              |
| HUJINVPSE 346 | Olpiidae | <i>Minniza babylonica</i> | 1  | 1961 | June      | 17 | Jerusalem                             | Judea    | 31.77 | 35.21 | Amitai P. A.    |
| HUJINVPSE 514 | Olpiidae | <i>Minniza babylonica</i> | 1  | 1973 | April     | 15 | Jerusalem                             | Judea    | 31.77 | 35.21 | Tsabar G. T.    |
| HUJINVPSE 515 | Olpiidae | <i>Minniza babylonica</i> | 1  | 1973 | April     | 15 | Jerusalem                             | Judea    | 31.77 | 35.21 | Tsabar G. T.    |
| HUJINVPSE 426 | Olpiidae | <i>Minniza babylonica</i> | 1  | 1975 | April     | 8  | Jerusalem, Holyland Hotel             | Judea    | 31.76 | 35.19 | Faunistics      |
| HUJINVPSE 813 | Olpiidae | <i>Minniza babylonica</i> | 1  | 2017 | June      | 19 | Soreq Nature Reserve                  | Judea    | 31.8  | 35.07 | Opiliones curse |
| HUJINVPSE 250 | Olpiidae | <i>Minniza babylonica</i> | 1  | 1963 | April     | 12 | Arad                                  | Negev    | 31.27 | 35.23 | Levy G. L.      |
| HUJINVPSE 333 | Olpiidae | <i>Minniza babylonica</i> | 1  | 1964 | August    | 6  | Arad                                  | Negev    | 31.27 | 35.23 | Amitai P. A.    |
| HUJINVPSE 392 | Olpiidae | <i>Minniza babylonica</i> | 2  | 1966 | June      | 9  | Arad                                  | Negev    | 31.27 | 35.23 | Levy G. L.      |
| HUJINVPSE 267 | Olpiidae | <i>Minniza babylonica</i> | 1  | 1967 | September | 24 | Arad                                  | Negev    | 31.27 | 35.23 | Tsabar G. T.    |
| HUJINVPSE 305 | Olpiidae | <i>Minniza babylonica</i> | 1  | 1967 | September | 16 | Arad                                  | Negev    | 31.27 | 35.23 | Tsabar G. T.    |
| HUJINVPSE 318 | Olpiidae | <i>Minniza babylonica</i> | 1  | 1967 | June      | 29 | Arad                                  | Negev    | 31.27 | 35.23 | Levy G. L.      |
| HUJINVPSE 313 | Olpiidae | <i>Minniza babylonica</i> | 7  | 1968 | May       | 30 | Arad                                  | Negev    | 31.27 | 35.23 | Amitai P. A.    |
| HUJINVPSE 354 | Olpiidae | <i>Minniza babylonica</i> | 1  | 1969 | May       | 5  | En E'Tureba                           | Judea    | 31.61 | 35.41 | Tsabar G. T.    |
| HUJINVPSE 377 | Olpiidae | <i>Minniza babylonica</i> | 1  | 1969 | May       | 5  | En E'Tureba                           | Judea    | 31.61 | 35.41 | Tsabar G. T.    |
| HUJINVPSE 399 | Olpiidae | <i>Minniza babylonica</i> | 1  | 1969 | May       | 5  | En E'Tureba                           | Judea    | 31.61 | 35.41 | Levy G. L.      |
| HUJINVPSE 423 | Olpiidae | <i>Minniza babylonica</i> | 1  | 1969 | May       | 15 | Arad                                  | Negev    | 31.27 | 35.23 | Faunistics      |
| HUJINVPSE 471 | Olpiidae | <i>Minniza babylonica</i> | 1  | 1970 | April     | 2  | En E'Tureba                           | Judea    | 31.61 | 35.41 | Amitai et al.   |
| HUJINVPSE 498 | Olpiidae | <i>Minniza babylonica</i> | 1  | 1970 | April     | 2  | En E'Tureba                           | Judea    | 31.61 | 35.41 | Amitai et al.   |
| HUJINVPSE 502 | Olpiidae | <i>Minniza babylonica</i> | 1  | 1970 | April     | 2  | En E'Tureba                           | Judea    | 31.61 | 35.41 | Amitai et al.   |
| HUJINVPSE 528 | Olpiidae | <i>Minniza babylonica</i> | 1  | 1970 | November  | 16 | Wadi Daraje                           | Judea    | 31.59 | 35.37 | Tsabar G. T.    |
| HUJINVPSE 550 | Olpiidae | <i>Minniza babylonica</i> | 1  | 1971 | November  | 29 | Ma'ale Adomim                         | Judea    | 31.78 | 35.3  | Tsabar G. T.    |
| HUJINVPSE 506 | Olpiidae | <i>Minniza babylonica</i> | 1  | 1973 | July      | 11 | Ma'ale Shalem                         | Judea    | 31.59 | 35.39 | Tsabar G. T.    |
| HUJINVPSE 200 | Olpiidae | <i>Minniza babylonica</i> | 1  | 1942 | February  | 25 | Dead Sea shore                        | Dead Sea | 31.52 | 35.4  | Shulov A.       |
| HUJINVPSE 283 | Olpiidae | <i>Minniza babylonica</i> | 1  | 1961 | May       | 6  | En Gedi                               | Dead Sea | 31.47 | 35.39 | Rosin R. R.     |
| HUJINVPSE 317 | Olpiidae | <i>Minniza babylonica</i> | 1  | 1961 | May       | 6  | En Gedi                               | Dead Sea | 31.47 | 35.39 | Rosin R. R.     |
| HUJINVPSE 348 | Olpiidae | <i>Minniza babylonica</i> | 1  | 1961 | May       | 6  | En Gedi                               | Dead Sea | 31.47 | 35.39 | Rosin R. R.     |
| HUJINVPSE 350 | Olpiidae | <i>Minniza babylonica</i> | 1  | 1961 | May       | 6  | En Gedi                               | Dead Sea | 31.47 | 35.39 | Rosin R. R.     |
| HUJINVPSE 512 | Olpiidae | <i>Minniza babylonica</i> | 6  | 1962 | September | 11 | En Gedi                               | Dead Sea | 31.47 | 35.39 |                 |
| HUJINVPSE 306 | Olpiidae | <i>Minniza babylonica</i> | 3  | 1963 | April     | 11 | En Arus                               | Dead Sea | 30.94 | 35.37 | Levy G. L.      |
| HUJINVPSE 481 | Olpiidae | <i>Minniza babylonica</i> | 1  | 1963 | March     | 1  | Qasr el Juheiniye (Mezad Tamar)       | Negev    | 31.03 | 35.24 | Werner Y.       |
| HUJINVPSE 337 | Olpiidae | <i>Minniza babylonica</i> | 1  | 1966 | March     | 7  | Mezd Tamar (Road Be'er Sheva - S'dom) | Negev    | 31.03 | 35.24 | Levy G. L.      |
| HUJINVPSE 316 | Olpiidae | <i>Minniza babylonica</i> | 1  | 1967 | April     | 10 | Sedom, 6 Km South of                  | Dead Sea | 30.98 | 35.31 | Amitai P. A.    |
| HUJINVPSE 332 | Olpiidae | <i>Minniza babylonica</i> | 11 | 1968 | April     | 11 | En Duyuk (NW of Jericho)              | Dead Sea | 31.88 | 35.43 | Levy G. L.      |
| HUJINVPSE 356 | Olpiidae | <i>Minniza babylonica</i> | 1  | 1969 | April     | 20 | Duyuk (Plataeu) (Jericho)             | Dead Sea | 31.88 | 35.43 | Levy G. L.      |
| HUJINVPSE 398 | Olpiidae | <i>Minniza babylonica</i> | 1  | 1969 | March     | 27 | En Boqeq                              | Dead Sea | 31.2  | 35.36 | Reichenstei     |



|               |          |                           |   |      |           |       |                                 |            |       |       |                      |
|---------------|----------|---------------------------|---|------|-----------|-------|---------------------------------|------------|-------|-------|----------------------|
| HUJINVPSE 424 | Olpiidae | <i>Minniza babylonica</i> | 1 | 1971 | May       | 28    | En Duyuk (Jericho)              | Dead Sea   | 31.88 | 35.43 | n S. R. Faunistics   |
| HUJINVPSE 223 | Olpiidae | <i>Minniza babylonica</i> | 1 | 1972 | April     | 6     | En Gedi                         | Dead Sea   | 31.47 | 35.39 | Tsabar G. T.         |
| HUJINVPSE 554 | Olpiidae | <i>Minniza babylonica</i> | 1 | 1972 | April     | 6     | Ein Gedi                        | Dead Sea   | 31.47 | 35.39 | Tsabar G. T.         |
| HUJINVPSE 453 | Olpiidae | <i>Minniza babylonica</i> | 2 | 1973 | May       | 16    | En Duyuk (NW of Jericho)        | Dead Sea   | 31.88 | 35.43 | Tsabar M. T.         |
| HUJINVPSE 382 | Olpiidae | <i>Minniza babylonica</i> | 1 | 1961 | June      | 30    | En Hazeva'                      | Arava      | 30.81 | 35.25 | Amitai P. A.         |
| HUJINVPSE 539 | Olpiidae | <i>Minniza babylonica</i> | 1 | 1974 | October   | 22    | En Mashak                       | Arava      | 30.8  | 35.19 | Tsabar G. T.         |
| HUJINVPSE 538 | Olpiidae | <i>Minniza babylonica</i> | 1 | 1988 | September | 16    | Nahal Amaz'yahu                 | Arava      | 30.87 | 35.3  | Shalmon B. S.        |
| HUJINVPSE 226 | Olpiidae | <i>Minniza babylonica</i> | 1 | 2003 | April     | 27    | Elot                            | Arava      | 29.58 | 34.97 | Ucitel D. U.         |
| HUJINVPSE 833 | Olpiidae | <i>Minniza babylonica</i> | 1 | 2003 | July      | 27    | Yotvata sands                   | Arava      | 29.9  | 35.08 | Shanas U. S.         |
| HUJINVPSE 853 | Olpiidae | <i>Minniza babylonica</i> | 2 | 2003 | July      | 27    | Avrona, North of En Avrona      | Arava      | 29.67 | 35.01 | Shanas U. S.         |
| HUJINVPSE 433 | Olpiidae | <i>Minniza babylonica</i> | 4 | 2004 | April     | 14    | Elot                            | Arava      | 29.58 | 34.97 | Shanas U. S.         |
| HUJINVPSE 734 | Olpiidae | <i>Minniza babylonica</i> | 1 | 2015 |           |       | Nahal Shitta                    | Arava      | 30.09 | 35.11 |                      |
| HUJINVPSE 618 | Olpiidae | <i>Minniza babylonica</i> | 1 | 2017 | September | 11,12 | Avrona                          | Arava      | 29.67 | 35.01 |                      |
| HUJINVPSE 625 | Olpiidae | <i>Minniza babylonica</i> | 1 | 2017 | May       | 16,17 | Avrona                          | Arava      | 29.67 | 35.01 |                      |
| HUJINVPSE 806 | Olpiidae | <i>Minniza babylonica</i> | 1 | 2017 | May       | 14-15 | Avrona                          | Arava      | 29.67 | 35.01 |                      |
| HUJINVPSE 328 | Olpiidae | <i>Minniza babylonica</i> | 1 | 1963 | May       | 8     | Be'er Sheva                     | Negev      | 31.31 | 34.79 | Amitai P. A.         |
| HUJINVPSE 397 | Olpiidae | <i>Minniza babylonica</i> | 3 | 1963 | April     | 10    | N. Gerar (Brosh)                | Negev      | 31.38 | 34.63 | Levy G. L.           |
| HUJINVPSE 301 | Olpiidae | <i>Minniza babylonica</i> | 1 | 1967 | November  | 13    | Kadesh Barnea                   | Negev      | 30.9  | 34.39 | Levy G. L.           |
| HUJINVPSE 361 | Olpiidae | <i>Minniza babylonica</i> | 3 | 1968 | April     | 7     | Bir Asluj                       | Negev      | 31.02 | 34.76 | Levy G. L.           |
| HUJINVPSE 420 | Olpiidae | <i>Minniza babylonica</i> | 1 | 1970 | April     | 5     | Mashabe' Sade                   | Negev      | 31    | 34.78 | Faunistics           |
| HUJINVPSE 225 | Olpiidae | <i>Minniza babylonica</i> | 1 | 1991 | March     | 16    | Upper Nahal Karkom, Negev       | Negev      | 30.32 | 34.7  | Lubin Y. L.          |
| HUJINVPSE 841 | Olpiidae | <i>Minniza babylonica</i> | 1 | 2022 | May       | 17    | Sayeret Shaked Park             | Negev-West | 31.28 | 34.65 | Peleg Jakubovits     |
| HUJINVPSE 296 | Olpiidae | <i>Minniza babylonica</i> | 1 | 1962 | April     | 1     | Mahtesh Gadol (Mahtesh Hathira) | Negev      | 30.94 | 34.99 | Shulov A. S.         |
| HUJINVPSE 484 | Olpiidae | <i>Minniza babylonica</i> | 1 | 1962 | April     | 22    | Nahal Nafha                     | Negev      | 30.73 | 34.83 | Wahrman J. W.        |
| HUJINVPSE 524 | Olpiidae | <i>Minniza babylonica</i> | 1 | 1962 | April     | 22    | Mahtesh Ramon                   | Negev      | 30.59 | 34.84 | Wahrman J. W.        |
| HUJINVPSE 475 | Olpiidae | <i>Minniza babylonica</i> | 1 | 1963 | May       | 4     | Ramon, Giv'at Mezah             | Negev      | 30.66 | 34.9  | Safriel U.           |
| HUJINVPSE 261 | Olpiidae | <i>Minniza babylonica</i> | 3 | 1967 | April     | 10    | Mahtesh Gadol (Mahtesh Hathira) | Negev      | 30.94 | 34.99 | Levy G. L.           |
| HUJINVPSE 323 | Olpiidae | <i>Minniza babylonica</i> | 1 | 1967 | April     | 9     | Mahtesh Gadol (Mahtesh Hathira) | Negev      | 30.94 | 34.99 | Levy G. L.           |
| HUJINVPSE 441 | Olpiidae | <i>Minniza babylonica</i> | 1 | 1967 | April     | 3     | Arif (Negev)                    | Negev      | 30.43 | 34.73 | Sandler H. S.        |
| HUJINVPSE 262 | Olpiidae | <i>Minniza babylonica</i> | 1 | 1973 | May       | 4     | S. E. of Arad                   | Negev      | 31.2  | 35.21 | Tintpulver M. T.     |
| HUJINVPSE 473 | Olpiidae | <i>Minniza babylonica</i> | 6 | 1987 | January   |       | Sede Boqer                      | Negev      | 30.86 | 34.78 | Roth V. & Roth B.    |
| HUJINVPSE 586 | Olpiidae | <i>Minniza babylonica</i> | 2 | 2017 | June      | 16    | Haluqim Ridge                   | Negev      | 30.88 | 34.73 | E. Gavish            |
| HUJINVPSE 654 | Olpiidae | <i>Minniza babylonica</i> | 1 | 2021 | October   | 27    | Bikat Zin, Nahal Hatira         | Negev      | 30.88 | 35.11 | Regev et al.         |
| HUJINVPSE 840 | Olpiidae | <i>Minniza babylonica</i> | 1 | 2022 | May       | 17    | Tel Zafit                       | Negev-East | 31.74 | 34.85 | Yoram Zvik Topper A. |

|               |          |                                   |   |      |          |    |                                      |                        |       |       |  |  |                                                           |
|---------------|----------|-----------------------------------|---|------|----------|----|--------------------------------------|------------------------|-------|-------|--|--|-----------------------------------------------------------|
|               |          |                                   |   |      |          |    |                                      |                        |       |       |  |  | Tzoor Magen                                               |
| HUJINVPSE 178 | Olpiidae | <i>Minniza babylonica</i>         | 1 | 1938 | December | 2  | Wadi Debich                          |                        |       |       |  |  |                                                           |
| HUJINVPSE 197 | Olpiidae | <i>Minniza babylonica</i>         | 1 | 1938 | July     | 1  | Wadi Debich                          |                        |       |       |  |  |                                                           |
| HUJINVPSE 831 | Olpiidae | <i>Minniza babylonica</i>         | 8 | 1946 | April    | 21 |                                      |                        |       |       |  |  | Steinitz H. S. EGR, Daniel Alfred, Aharon S. Shanas U. S. |
| HUJINVPSE 933 | Olpiidae | <i>Olpium</i>                     | 2 | 2022 | October  | 27 | Tel Sokho                            | Shfelat Yehudah        | 31.68 | 34.97 |  |  |                                                           |
| HUJINVPSE 432 | Olpiidae | <i>Olpium</i>                     | 1 | 2004 | July     | 20 | Yahel, South of                      | Arava                  | 30.08 | 35.13 |  |  |                                                           |
| HUJINVPSE 553 | Olpiidae | <i>Olpium</i>                     | 1 | 1956 | October  | 1  | Be'er Sheva - Sedom road 20km        | Negev                  | 31.2  | 34.94 |  |  |                                                           |
| HUJINVPSE 681 | Olpiidae | <i>Olpium</i>                     | 2 | 1965 | March    | 19 | Gan Sh'muel                          | Central coastal Plain  | 32.45 | 34.95 |  |  |                                                           |
| HUJINVPSE 723 | Olpiidae | <i>Olpium kochi</i>               | 1 | 2020 | Feb      | 16 | Haruva cave                          | Judea                  | 31.91 | 34.96 |  |  | EGR                                                       |
| HUJINVPSE 730 | Olpiidae | <i>Olpium kochi</i>               | 1 | 2018 | August   | 25 | Marva cave (near Meona)              | Galilee                | 33.02 | 35.24 |  |  | Aharon S.                                                 |
| HUJINVPSE 202 | Olpiidae | <i>Olpium pallipes</i>            | 1 | 1953 | August   | 11 | Caesarea                             | Central coastal Plain  | 32.51 | 34.89 |  |  | Costa                                                     |
| HUJINVPSE 205 | Olpiidae | <i>Olpium pallipes</i>            | 1 | 1944 |          |    |                                      |                        |       |       |  |  | Shulov A.                                                 |
| HUJINVPSE 293 | Olpiidae | <i>Olpium pallipes balcanicum</i> | 2 | 1961 | May      | 13 | Manara (Ramim) - Misra               | Galil                  | 33.2  | 35.55 |  |  | Amitai P. A.                                              |
| HUJINVPSE 308 | Olpiidae | <i>Olpium pallipes balcanicum</i> | 1 | 1961 | May      | 13 | Manara (Ramim)                       | Galil                  | 33.2  | 35.55 |  |  | Amitai P. A.                                              |
| HUJINVPSE 445 | Olpiidae | <i>Olpium pallipes balcanicum</i> | 1 | 1966 | November | 15 | Manara                               | Galil                  | 33.2  | 35.55 |  |  | Sandler H. S.                                             |
| HUJINVPSE 245 | Olpiidae | <i>Olpium pallipes balcanicum</i> | 1 | 1961 | May      | 12 | Mount Tavor                          | Galil                  | 32.69 | 35.39 |  |  | Amitai P. A.                                              |
| HUJINVPSE 461 | Olpiidae | <i>Olpium pallipes balcanicum</i> | 1 | 1967 | May      | 10 | Carmel                               | Carmel                 | 32.74 | 35.03 |  |  | Shkolnik A. S.                                            |
| HUJINVPSE 687 | Olpiidae | <i>Olpium pallipes balcanicum</i> | 1 | 2018 | August   | 20 | Ornit cave                           | Carmel                 | 32.76 | 34.99 |  |  | Aharon S.                                                 |
| HUJINVPSE 530 | Olpiidae | <i>Olpium pallipes balcanicum</i> | 1 | 1962 | August   | 29 | Akko                                 | Northern Coastal Plain | 32.94 | 35.07 |  |  | Katznelson                                                |
| HUJINVPSE 523 | Olpiidae | <i>Olpium pallipes balcanicum</i> | 6 | 1966 | October  | 14 | Allone Abba                          | Galil                  | 32.73 | 35.17 |  |  | Costa M. C.                                               |
| HUJINVPSE 479 | Olpiidae | <i>Olpium pallipes balcanicum</i> | 1 | 1967 | March    | 11 | Mishmar Ha'emek                      | Jezreel Valley         | 32.61 | 35.14 |  |  | Costa M. C.                                               |
| HUJINVPSE 676 | Olpiidae | <i>Olpium pallipes balcanicum</i> | 1 | 1967 | April    | 6  | Mishmar Ha'emek                      | Jezreel Valley         | 32.61 | 35.14 |  |  | Costa M. C.                                               |
| HUJINVPSE 464 | Olpiidae | <i>Olpium pallipes balcanicum</i> | 2 | 1967 | May      | 8  | Hamadyia, Near (opp.), Jordan Valley | Jordan Valley          | 32.53 | 35.54 |  |  | Costa M. C.                                               |
| HUJINVPSE 208 | Olpiidae | <i>Olpium pallipes balcanicum</i> | 1 | 1954 | October  | 15 | Holon                                | Central coastal Plain  | 32    | 34.78 |  |  |                                                           |
| HUJINVPSE 516 | Olpiidae | <i>Olpium pallipes balcanicum</i> | 1 | 1971 | April    | 23 | Rishon Le'Zion                       | Central coastal Plain  | 31.95 | 34.78 |  |  | Tsabar G. T.                                              |
| HUJINVPSE 221 | Olpiidae | <i>Olpium pallipes balcanicum</i> | 1 | 1973 | May      | 23 | Ziqim                                | Southern coastal Plain | 31.61 | 34.51 |  |  | Tsabar G. T.                                              |
| HUJINVPSE 227 | Olpiidae | <i>Olpium pallipes balcanicum</i> | 1 | 1973 | May      | 23 | Ziqim                                | Southern coastal       | 31.61 | 34.51 |  |  | Tsabar G. T.                                              |

|               |          |                                   |    |      |           |    |                                      |                              |       |       |                  |
|---------------|----------|-----------------------------------|----|------|-----------|----|--------------------------------------|------------------------------|-------|-------|------------------|
| HUJINVPSE 419 | Olpiidae | <i>Olpium pallipes balcanicum</i> | 1  | 1973 | May       | 23 | Ziqim                                | Plain Southern Coastal Plain | 31.61 | 34.51 | Faunistics       |
| HUJINVPSE 497 | Olpiidae | <i>Olpium pallipes balcanicum</i> | 1  | 1973 | May       | 23 | Ziqim                                | Southern Coastal Plain       | 31.61 | 34.51 | Tsabar G. T.     |
| HUJINVPSE 520 | Olpiidae | <i>Olpium pallipes balcanicum</i> | 1  | 1973 | June      | 21 | Rafiah                               | Southern Coastal Plain       | 31.32 | 34.24 | Tsabar G. T.     |
| HUJINVPSE 467 | Olpiidae | <i>Olpium pallipes balcanicum</i> | 1  | 1979 | May       | 9  | Holon                                | Central coastal Plain        | 32    | 34.78 | Avital E. A.     |
| HUJINVPSE 235 | Olpiidae | <i>Olpium pallipes balcanicum</i> | 1  | 1954 | March     | 3  | Hartuv                               | Shfelat Yehudah              | 31.77 | 34.99 |                  |
| HUJINVPSE 706 | Olpiidae | <i>Olpium pallipes balcanicum</i> | 1  | 1964 | November  | 12 | Bet Gimal                            | Shfelat Yehudah              | 31.72 | 34.98 | Levy G. L.       |
| HUJINVPSE 483 | Olpiidae | <i>Olpium pallipes balcanicum</i> | 1  | 1971 | April     | 22 | Azarya (in the Shephelah near Gezer) | Shfelat Yehudah              | 31.9  | 34.91 | Tsabar G. T.     |
| HUJINVPSE 924 | Olpiidae | <i>Olpium pallipes balcanicum</i> | 2  | 2022 | August    | 16 | Nahal Socho                          | Shfelat Yehudah              | 31.63 | 34.97 | EGR, PPS, GG     |
| HUJINVPSE 311 | Olpiidae | <i>Olpium pallipes balcanicum</i> | 10 | 1944 | January   | 28 | Qiryat Anavim (forest)               | Judea                        | 31.81 | 35.12 | Steinitz H. S.   |
| HUJINVPSE 266 | Olpiidae | <i>Olpium pallipes balcanicum</i> | 1  | 1960 | May       | 25 | Motza (Km. 7)                        | Judea                        | 31.79 | 35.17 | Amitai P. A.     |
| HUJINVPSE 339 | Olpiidae | <i>Olpium pallipes balcanicum</i> | 1  | 1961 | June      | 17 | Jerusalem                            | Judea                        | 31.77 | 35.21 | Amitai P. A.     |
| HUJINVPSE 456 | Olpiidae | <i>Olpium pallipes balcanicum</i> | 1  | 1974 | May       | 7  | Jerusalem, Mt. Scopus                | Judea                        | 31.79 | 35.25 | Tsabar G. T.     |
| HUJINVPSE 578 | Olpiidae | <i>Olpium pallipes balcanicum</i> | 3  | 2017 | June      | 19 | Soreq Nature Reserve                 | Judea                        | 31.8  | 35.07 | Opiliones curse  |
| HUJINVPSE 203 | Olpiidae | <i>Olpium pallipes balcanicum</i> | 1  | 1954 | March     | 24 | Wadi Fukra                           | Judea                        | 30.95 | 35.28 | Warburg M. W.    |
| HUJINVPSE 204 | Olpiidae | <i>Olpium pallipes balcanicum</i> | 1  | 1961 | May       | 19 | Tureiba                              | Judea                        | 31.61 | 35.41 | Wahrman J. W.    |
| HUJINVPSE 353 | Olpiidae | <i>Olpium pallipes balcanicum</i> | 1  | 1963 | April     | 19 | Arad                                 | Negev                        | 31.27 | 35.23 | Levy G. L.       |
| HUJINVPSE 504 | Olpiidae | <i>Olpium pallipes balcanicum</i> | 1  | 1963 | March     | 13 | Tureiba                              | Judea                        | 31.61 | 35.41 | Werner et al.    |
| HUJINVPSE 330 | Olpiidae | <i>Olpium pallipes balcanicum</i> | 1  | 1965 | May       | 28 | Arad                                 | Negev                        | 31.27 | 35.23 | Levy G. L.       |
| HUJINVPSE 338 | Olpiidae | <i>Olpium pallipes balcanicum</i> | 1  | 1965 | May       | 27 | Arad                                 | Negev                        | 31.27 | 35.23 | Levy G. L.       |
| HUJINVPSE 255 | Olpiidae | <i>Olpium pallipes balcanicum</i> | 1  | 1967 | September | 24 | Arad                                 | Negev                        | 31.27 | 35.23 | Tsabar G. T.     |
| HUJINVPSE 263 | Olpiidae | <i>Olpium pallipes balcanicum</i> | 1  | 1967 | April     | 9  | Ze'elim                              | Negev                        | 31.2  | 34.54 | Levy G. L.       |
| HUJINVPSE 279 | Olpiidae | <i>Olpium pallipes balcanicum</i> | 1  | 1967 | September | 24 | Arad                                 | Negev                        | 31.27 | 35.23 | Tsabar G. T.     |
| HUJINVPSE 289 | Olpiidae | <i>Olpium pallipes balcanicum</i> | 1  | 1967 | September | 24 | Arad                                 | Negev                        | 31.27 | 35.23 | Tsabar G. T.     |
| HUJINVPSE 327 | Olpiidae | <i>Olpium pallipes balcanicum</i> | 1  | 1967 | July      | 7  | Wadi Kelt                            | Judea                        | 31.85 | 35.42 | Shulov S. et al. |
| HUJINVPSE 527 | Olpiidae | <i>Olpium pallipes balcanicum</i> | 1  | 1967 | June      | 29 | Arad                                 | Negev                        | 31.27 | 35.23 | Pener et al.     |
| HUJINVPSE 343 | Olpiidae | <i>Olpium pallipes balcanicum</i> | 1  | 1969 | May       | 5  | En E'Tureba                          | Judea                        | 31.61 | 35.41 | Tsabar G. T.     |
| HUJINVPSE 542 | Olpiidae | <i>Olpium pallipes balcanicum</i> | 1  | 1970 | November  | 16 | Wadi Daraje                          | Judea                        | 31.59 | 35.37 | Tsabar G. T.     |

|               |          |                                   |   |      |           |       |                            |              |       |       |                 |
|---------------|----------|-----------------------------------|---|------|-----------|-------|----------------------------|--------------|-------|-------|-----------------|
| HUJINVPSE 499 | Olpiidae | <i>Olpium pallipes balcanicum</i> | 1 | 1973 | July      | 11    | Ma'ale Shalem              | Judea        | 31.59 | 35.39 | Tsabar G. T.    |
| HUJINVPSE 540 | Olpiidae | <i>Olpium pallipes balcanicum</i> | 1 | 1973 | July      | 11    | En E'Tureba                | Judea        | 31.61 | 35.41 | Tsabar G. T.    |
| HUJINVPSE 692 | Olpiidae | <i>Olpium pallipes balcanicum</i> | 1 | 2018 | July      | 31    | Arad cemetary              | Negev        | 31.27 | 35.23 | Aharon S.       |
| HUJINVPSE 594 | Olpiidae | <i>Olpium pallipes balcanicum</i> | 1 | 2019 | May       | 13-16 | Ashalim N. Gmalim          | Dead Sea     | 31.11 | 35.23 | A. Gera         |
| HUJINVPSE 596 | Olpiidae | <i>Olpium pallipes balcanicum</i> | 1 | 2019 | May       | 13-16 | N. Ashalim lower           | Dead Sea     | 31.07 | 35.31 | A. Gera         |
| HUJINVPSE 674 | Olpiidae | <i>Olpium pallipes balcanicum</i> | 1 | 2021 | November  | 24    | Nahal Og                   | Judea desert | 31.78 | 35.46 | Shacham B.      |
| HUJINVPSE 252 | Olpiidae | <i>Olpium pallipes balcanicum</i> | 1 | 1961 | May       | 6     | En Gedi                    | Dead Sea     | 31.47 | 35.39 | Rosin R. R.     |
| HUJINVPSE 258 | Olpiidae | <i>Olpium pallipes balcanicum</i> | 1 | 1961 | May       | 6     | En Gedi                    | Dead Sea     | 31.47 | 35.39 | Rosin R. R.     |
| HUJINVPSE 275 | Olpiidae | <i>Olpium pallipes balcanicum</i> | 1 | 1961 | May       | 7     | En Gedi                    | Dead Sea     | 31.47 | 35.39 | Rosin R. R.     |
| HUJINVPSE 294 | Olpiidae | <i>Olpium pallipes balcanicum</i> | 1 | 1961 | May       | 7     | En Gedi                    | Dead Sea     | 31.47 | 35.39 | Rosin R. R.     |
| HUJINVPSE 374 | Olpiidae | <i>Olpium pallipes balcanicum</i> | 1 | 1961 | May       | 6     | En Gedi                    | Dead Sea     | 31.47 | 35.39 | Rosin R. R.     |
| HUJINVPSE 533 | Olpiidae | <i>Olpium pallipes balcanicum</i> | 1 | 1966 | March     | 20    | Har Sedom                  | Dead Sea     | 31.09 | 35.38 | Costa M. C.     |
| HUJINVPSE 439 | Olpiidae | <i>Olpium pallipes balcanicum</i> | 1 | 1967 | March     | 14    | En Gedi                    | Dead Sea     | 31.47 | 35.39 | Costa M. C.     |
| HUJINVPSE 285 | Olpiidae | <i>Olpium pallipes balcanicum</i> | 1 | 1971 | March     | 18    | Kalia                      | Dead Sea     | 31.73 | 35.49 | Tsabar G. T.    |
| HUJINVPSE 427 | Olpiidae | <i>Olpium pallipes balcanicum</i> | 2 | 1973 | May       | 16    | En Duyuk (Jericho)         | Dead Sea     | 31.88 | 35.43 | Faunistics      |
| HUJINVPSE 478 | Olpiidae | <i>Olpium pallipes balcanicum</i> | 1 | 1976 | June      | 8     | En Duyuk [Jericho]         | Dead Sea     | 31.88 | 35.43 | Faunistics      |
| HUJINVPSE 470 | Olpiidae | <i>Olpium pallipes balcanicum</i> | 3 | 1988 | September | 25    | Hazeva                     | Arava        | 30.81 | 35.25 | Weinstein A. W. |
| HUJINVPSE 222 | Olpiidae | <i>Olpium pallipes balcanicum</i> | 4 | 2003 | July      | 27    | Yotvata sands, East of     | Arava        | 29.9  | 35.08 | Shanas U. S.    |
| HUJINVPSE 224 | Olpiidae | <i>Olpium pallipes balcanicum</i> | 2 | 2003 | August    | 2     | Lotan, Near                | Arava        | 29.99 | 35.09 | Shanas U. S.    |
| HUJINVPSE 229 | Olpiidae | <i>Olpium pallipes balcanicum</i> | 1 | 2003 | April     | 29    | Yotvata, sands             | Arava        | 29.9  | 35.08 | Ucitel D. U.    |
| HUJINVPSE 435 | Olpiidae | <i>Olpium pallipes balcanicum</i> | 3 | 2003 | July      | 27    | Avrona, North of En Avrona | Arava        | 29.67 | 35.01 | Shanas U. S.    |
| HUJINVPSE 220 | Olpiidae | <i>Olpium pallipes balcanicum</i> | 6 | 2004 | April     | 20    | Lotan, East of             | Arava        | 29.99 | 35.09 | Shanas U. S.    |
| HUJINVPSE 429 | Olpiidae | <i>Olpium pallipes balcanicum</i> | 4 | 2004 | July      | 18    | Lotan, East of             | Arava        | 29.99 | 35.09 | Shanas U. S.    |
| HUJINVPSE 431 | Olpiidae | <i>Olpium pallipes balcanicum</i> | 1 | 2004 | August    | 14    | Lotan, East of             | Arava        | 29.99 | 35.09 | Shanas U. S.    |
| HUJINVPSE 621 | Olpiidae | <i>Olpium pallipes balcanicum</i> | 1 | 2017 | September | 12,13 | Avrona                     | Arava        | 29.67 | 35.01 |                 |
| HUJINVPSE 917 | Olpiidae | <i>Olpium pallipes balcanicum</i> | 1 | 2017 | September | 11,12 | Avrona                     | Arava        | 29.67 | 35.01 |                 |
| HUJINVPSE 764 | Olpiidae | <i>Olpium pallipes balcanicum</i> | 1 | 2022 |           |       | Nahal Shitta               | Arava        | 30.09 | 35.11 | Havlena         |
| HUJINVPSE 379 | Olpiidae | <i>Olpium pallipes balcanicum</i> | 2 | 1963 | April     | 10    | Ze'elim                    | Negev        | 31.2  | 34.54 | Levy G. L.      |
| HUJINVPSE 365 | Olpiidae | <i>Olpium pallipes balcanicum</i> | 1 | 1966 | June      | 9     | Brosh                      | Negev        | 31.38 | 34.63 | Levy G. L.      |
| HUJINVPSE 510 | Olpiidae | <i>Olpium pallipes balcanicum</i> | 1 | 1966 | April     | 18    | Bir Milkhan (Negev)(Beer   | Negev        | 30.93 | 34.42 | Sandler H. S.   |

|               |          |                                   |   |      |          |    |                                             |              |       |       |                                 |
|---------------|----------|-----------------------------------|---|------|----------|----|---------------------------------------------|--------------|-------|-------|---------------------------------|
| HUJINVPSE 403 | Olpiidae | <i>Olpium pallipes balcanicum</i> | 1 | 1970 | June     | 1  | Milkah)<br>Be'er Sheva, 15Km South of, sand | Negev        | 31.19 | 34.8  | Levy G. L.                      |
| HUJINVPSE 834 | Olpiidae | <i>Olpium pallipes balcanicum</i> | 1 | 1970 | April    | 5  | Mashabe' Sade                               | Negev        | 31    | 34.78 | Faunistics                      |
| HUJINVPSE 653 | Olpiidae | <i>Olpium pallipes balcanicum</i> | 1 | 2018 | June     | 19 | Be'er Milka                                 | Negev        | 30.93 | 34.42 | Sinaiko G.                      |
| HUJINVPSE 756 | Olpiidae | <i>Olpium pallipes balcanicum</i> | 1 | 2022 | February | 24 | Duda'im North of Beer Sheva                 | Negev        | 31.33 | 34.8  | Harms D.,<br>EGR,<br>Warburg S. |
| HUJINVPSE 757 | Olpiidae | <i>Olpium pallipes balcanicum</i> | 1 | 2022 | February | 18 | Nizana wadi                                 | Negev        | 30.76 | 34.54 | Harms D.,<br>EGR,<br>Warburg S. |
| HUJINVPSE 759 | Olpiidae | <i>Olpium pallipes balcanicum</i> | 1 | 2022 | February | 24 | Duda'im North of Beer Sheva                 | Negev        | 31.33 | 34.8  | Harms D.,<br>EGR,<br>Warburg S. |
| HUJINVPSE 273 | Olpiidae | <i>Olpium pallipes balcanicum</i> | 1 | 1966 | February | 22 | Bik'at Uvda                                 | Negev        | 29.95 | 34.97 | Tsabar                          |
| HUJINVPSE 286 | Olpiidae | <i>Olpium pallipes balcanicum</i> | 2 | 1946 | April    | 19 | Wadi Ramam (Nahal Ramon)                    | Negev        | 30.59 | 34.84 | Steinitz H. S.                  |
| HUJINVPSE 207 | Olpiidae | <i>Olpium pallipes balcanicum</i> | 1 | 1959 | April    | 30 | Nahal Nafha                                 | Negev        | 30.73 | 34.83 | Wahrman J. W.                   |
| HUJINVPSE 228 | Olpiidae | <i>Olpium pallipes balcanicum</i> | 1 | 1962 | April    | 22 | Nahal Nafha                                 | Negev        | 30.73 | 34.83 | Wahrman J. W.                   |
| HUJINVPSE 518 | Olpiidae | <i>Olpium pallipes balcanicum</i> | 1 | 1962 | April    | 22 | Mahtesh Ramon                               | Negev        | 30.55 | 34.89 | Wahrman J. W.                   |
| HUJINVPSE 396 | Olpiidae | <i>Olpium pallipes balcanicum</i> | 1 | 1969 | April    | 15 | Mahtesh Gadol (Mahtesh Hathira)             | Negev        | 30.94 | 34.99 | Levy G. L.                      |
| HUJINVPSE 422 | Olpiidae | <i>Olpium pallipes balcanicum</i> | 2 | 1970 | April    | 5  | Mahtesh Gadol (Mahtesh Hathira)             | Negev        | 30.94 | 34.99 | Faunistics                      |
| HUJINVPSE 256 | Olpiidae | <i>Olpium pallipes balcanicum</i> | 1 | 1973 | May      | 4  | S. E. of Arad                               | Negev        | 31.2  | 35.21 | Tintpulver M. T.                |
| HUJINVPSE 282 | Olpiidae | <i>Olpium pallipes balcanicum</i> | 1 | 1973 | May      | 4  | S. E. of Arad                               | Negev        | 31.2  | 35.21 | Tintpulver M. T.                |
| HUJINVPSE 405 | Olpiidae | <i>Olpium pallipes balcanicum</i> | 1 | 1973 | May      | 4  | S. E. of Arad                               | Negev        | 31.2  | 35.21 | Tintpulver M. T.                |
| HUJINVPSE 838 | Olpiidae | <i>Olpium pallipes balcanicum</i> | 3 | 1987 | January  |    | Sede Boqer                                  | Negev        | 30.86 | 34.78 | Roth V. & Roth B.               |
| HUJINVPSE 290 | Olpiidae | <i>Olpium pallipes balcanicum</i> | 1 | 1992 | October  | 13 | Har Hursha (W. of Ramon)                    | Negev        | 30.57 | 34.53 | Lubin Y. L.                     |
| HUJINVPSE 710 | Olpiidae | <i>Olpium pallipes balcanicum</i> | 3 | 2018 | July     | 21 | Sdeh Boqer                                  | Negev mt.    | 30.86 | 34.78 | Aharon S.                       |
| HUJINVPSE 661 | Olpiidae | <i>Olpium pallipes balcanicum</i> | 1 | 2019 | June     | 13 | Mitzpe Ramon                                | Negev        | 30.6  | 34.83 | Itay Taslev                     |
| HUJINVPSE 655 | Olpiidae | <i>Olpium pallipes balcanicum</i> | 1 | 2021 | November | 7  | Bikat Zin, Nahal Hatira                     | Negev        | 30.85 | 35.06 | Yoram Zvik                      |
| HUJINVPSE 747 | Olpiidae | <i>Olpium pallipes balcanicum</i> | 1 | 2022 | February | 17 | Nahal Shen, Machtsh Ramon                   | Negev        | 30.59 | 34.89 | Harms D.,<br>EGR,<br>Warburg S. |
| HUJINVPSE 748 | Olpiidae | <i>Olpium pallipes balcanicum</i> | 1 | 2022 | February | 17 | Nahal Shen, Machtsh Ramon                   | Negev        | 30.59 | 34.89 | Harms D.,<br>EGR,<br>Warburg S. |
| HUJINVPSE 763 | Olpiidae | <i>Olpium pallipes balcanicum</i> | 1 | 2022 | February | 18 | near Bor Hemet                              | Negev        | 30.59 | 34.71 | Harms D.,<br>EGR                |
| HUJINVPSE 839 | Olpiidae | <i>Olpium pallipes balcanicum</i> | 4 | 2022 | May      | 8  | Nahal Revivim near Retamim                  | Negev-centre | 31.06 | 34.69 | Aharon S. + G & R               |
| HUJINVPSE 726 | Olpiidae | <i>Olpium pallipes balcanicum</i> | 1 |      |          |    | Sdeh Boqer Ben Gurion grave                 | Negev mt.    | 30.86 | 34.78 |                                 |
| HUJINVPSE 232 | Olpiidae | <i>Olpium pallipes balcanicum</i> | 1 | 1974 | June     | 15 | Wasit                                       | Golan        | 33.14 | 35.73 | Verechson E. V.                 |

|               |            |                                   |    |      |           |       |                                    |                              |       |       |                           |
|---------------|------------|-----------------------------------|----|------|-----------|-------|------------------------------------|------------------------------|-------|-------|---------------------------|
| HUJINVPSE 526 | Olpiidae   | <i>Olpium pallipes balcanicum</i> | 1  | 1987 | July      | 7     | Mt. Hermon, 1700m                  | Hermon                       | 33.32 | 35.78 | Levy G. L.                |
| HUJINVPSE 544 | Olpiidae   | <i>Olpium pallipes balcanicum</i> | 1  | 1987 | July      | 6     | Mt. Hermon (2000m) Esh'char valley | Hermon                       | 33.32 | 35.78 | Levy G. L.                |
| HUJINVPSE 288 | Olpiidae   | <i>Olpium pallipes balcanicum</i> | 16 | 1946 | April     | 21    |                                    |                              |       |       | Steinitz H. S.            |
| HUJINVPSE 770 | Olpiidae   | <i>Olpium pallipes balcanicum</i> | 1  | 2021 | September | 30    | Hazan Hills, Amatzia               | Shfelat Yehudah              | 31.52 | 34.91 | Pinchevsky D.             |
| HUJINVPSE 782 | Olpiidae   | <i>Olpium pallipes balcanicum</i> | 2  | 2021 | September | 30    | Hazan Hills, Amatzia               | Shfelat Yehudah              | 31.52 | 34.91 | Pinchevsky D.             |
| HUJINVPSE 784 | Olpiidae   | <i>Olpium pallipes balcanicum</i> | 1  | 2022 | January   | 11    | Hazan Hills, Amatzia               | Shfelat Yehudah              | 31.52 | 34.91 | Pinchevsky D.             |
| HUJINVPSE 795 | Olpiidae   | <i>Olpium pallipes balcanicum</i> | 1  | 2016 | May       | 20    | Avrona                             | Arava                        | 29.67 | 35.01 | E. Gavish Regev et al.    |
| HUJINVPSE 802 | Olpiidae   | <i>Olpium pallipes balcanicum</i> | 1  | 2016 | May       | 21    | Avrona                             | Arava                        | 29.67 | 35.01 |                           |
| HUJINVPSE 629 | Olpiidae   | <i>Olpium pallipes balcanicum</i> | 1  | 2017 | May       | 17,18 | Avrona                             | Arava                        | 29.67 | 35.01 |                           |
| HUJINVPSE 807 | Olpiidae   | <i>Olpium pallipes balcanicum</i> | 1  | 2017 | May       | 15-16 | Avrona                             | Arava                        | 29.67 | 35.01 |                           |
| HUJINVPSE 808 | Olpiidae   | <i>Olpium pallipes balcanicum</i> | 1  | 2017 | May       | 14-15 | Avrona                             | Arava                        | 29.67 | 35.01 |                           |
| HUJINVPSE 810 | Olpiidae   | <i>Olpium pallipes balcanicum</i> | 1  | 2017 | September |       | Avrona                             | Arava                        | 29.67 | 35.01 |                           |
| HUJINVPSE 788 | Olpiidae   | <i>Olpium pallipes balcanicum</i> | 1  | 2019 | May       |       | Menucha ridge                      | Negev                        | 30.29 | 35.06 | Yael Berner               |
| HUJINVPSE 792 | Olpiidae   | <i>Olpium pallipes balcanicum</i> | 1  | 2020 | May       | 11    | Saif wadi North of Idan            | Arava                        | 30.85 | 35.29 | Yael Berner               |
| HUJINVPSE 760 | Olpiidae   | <i>Olpium pallipes balcanicum</i> | 1  | 2022 | February  | 17    | Nahal Shen, Machtesh Ramon         | Negev                        | 30.59 | 34.89 | Harms D., EGR, Warburg S. |
| HUJINVPSE 915 | Olpiidae   | <i>Olpium pallipes balcanicum</i> | 2  | 2022 | August    | 2     | Sdeh Boqer- Reches Halukim         | Negev mt.                    | 30.88 | 34.73 | Aharon S.                 |
| HUJINVPSE 809 | Olpiidae   | <i>Olpium pallipes balcanicum</i> | 1  | 2017 | May       | 17-18 | Avrona                             | Arava                        | 29.67 | 35.01 |                           |
| HUJINVPSE 393 | Olpiidae   | <i>Olpium pallipes balcanicum</i> | 1  | 1944 | September | 4     | Har Can'an                         | Galil                        | 32.98 | 35.52 |                           |
| HUJINVPSE 634 | Olpiidae   | <i>Olpium pallipes balcanicum</i> | 1  | 2017 | May       | 16,17 | Avrona                             | Arava                        | 29.67 | 35.01 |                           |
| HUJINVPSE 796 | Olpiidae   | <i>Olpium pallipes balcanicum</i> | 1  | 2017 | September | 13-14 | Avrona                             | Arava                        | 29.67 | 35.01 | E. Gavish Regev et al.    |
| HUJINVPSE 923 | Olpiidae   | <i>Olpium</i>                     | 1  | 2022 | August    | 11    | Tel Sokho                          | Shfelat Yehudah              | 31.68 | 34.97 | EGR, PPS, GG              |
| HUJINVPSE 677 | Olpiidae   |                                   | 1  | 1967 | April     | 6     | Mishmar Ha'emek                    | Jezreel Valley West Samariah | 32.61 | 35.14 | Costa M. C.               |
| HUJINVPSE 835 | Syarinidae | <i>Hadoblothrus</i>               | 1  | 2007 | May       | 5     | Sha'at cave                        | Samariah                     | 32.17 | 35.1  | Israel Naaman             |
| HUJINVPSE 948 | Whithiidae | <i>Nannowithius wahrmani</i>      | 3  | 2023 | April     | 27    | Givat Sal'it                       | Jordan Valley                | 32.36 | 35.51 | Yoram Zvik                |
| HUJINVPSE 949 | Whithiidae | <i>Nannowithius wahrmani</i>      | 6  | 2023 | April     | 27    | Rotem                              | Jordan Valley                | 32.34 | 35.52 | Yoram Zvik                |
| HUJINVPSE 950 | Whithiidae | <i>Nannowithius wahrmani</i>      | 2  | 2023 | April     | 27    | Givat Sal'it                       | Jordan Valley                | 32.36 | 35.51 | Yoram Zvik                |

**Table S2.** Geographic distribution of the pseudoscorpion families in Israel (Hermon, Golan, Galilee, Hula Valley, Jezreel Valley, Coastal Plain, Central Mountains (Carmel, Samaria, Judea hills and Judea foothills), Dead Sea and Jordan Rift Valley, Judean Desert, Negev Desert and Arava Desert) (data of 1548 specimens in the collection).

| Family         | Hermon | Golan | Galilee | Hula Valley | Jezreel Valley | Coastal Plain | Central Mountains | Dead Sea & Jordan Rift Valley | Judean Desert | Negev Desert | Arava Desert |
|----------------|--------|-------|---------|-------------|----------------|---------------|-------------------|-------------------------------|---------------|--------------|--------------|
| Atemnidae      |        |       |         |             |                |               |                   |                               | 1             |              |              |
| Cheiridiidae   |        |       |         |             |                |               |                   |                               | 1             |              |              |
| Cheliferidae   |        | 5     | 34      | 19          | 7              | 89            | 154               | 17                            | 8             | 3            | 137          |
| Chernetidae    | 18     | 1     | 13      |             | 78             | 19            | 152               | 1                             |               | 2            | 3            |
| Chthoniidae    |        |       | 20      | 2           |                |               | 54                |                               | 1             |              |              |
| Garypidae      |        |       |         |             |                | 32            |                   |                               |               |              |              |
| Garypinidae    |        |       | 48      |             |                |               | 29                |                               |               |              |              |
| Geogarypidae   |        |       | 8       | 3           |                | 3             | 5                 |                               |               |              |              |
| Hesperolpiidae | 1      |       |         | 2           |                | 1             | 4                 | 1                             | 3             | 3            |              |
| Menthidae      |        |       |         |             |                |               | 1                 |                               |               | 1            |              |
| Neobisiidae    |        | 5     | 29      |             | 46             | 4             | 59                | 1                             |               | 5            |              |
| Olpiidae       | 2      | 1     | 12      |             | 9              | 15            | 56                | 73                            | 45            | 101          | 99           |
| Syarinidae     |        |       |         |             |                |               | 1                 |                               |               |              |              |
| Withiidae      |        |       |         |             |                |               |                   | 11                            |               | 6            |              |

**Table S3.** Geographic distribution of the pseudoscorpion species in Israel (Hermon, Golan, Galilee, Hula Valley, Jezreel Valley, Coastal Plain, Central Mountains (Carmel, Samaria, Judea hills and Judea foothills), Dead Sea and Jordan Rift Valley, Judean Desert, Negev Desert and Arava Desert). Data of 1397 fully identified specimens deposited in the collection and \* indicates localities specified in: Beier [40], Beier [15], Halperin & Mahnert [17], Mahnert [16] and Štáhlavský et al. [26].

| Species                                      | Hermon | Golan | Galilee | Hula | Coastal Plain | Jezreel Valley | Central Mountains | Judean Desert | Negev Desert | Dead Sea & Jordan Rift Valley | Arava Desert |
|----------------------------------------------|--------|-------|---------|------|---------------|----------------|-------------------|---------------|--------------|-------------------------------|--------------|
| <i>Atemnus syriacus</i>                      |        |       | 1*      |      |               |                |                   |               |              |                               |              |
| <i>Chelifer cancroides</i>                   |        |       |         |      | 1             |                | 6                 |               | 1            | 1                             |              |
| <i>Dactylochelifer kussariensis</i>          |        |       |         |      | 3             |                |                   |               |              |                               |              |
| <i>Dactylochelifer pallidus</i>              |        |       |         | 13   |               |                |                   |               |              | 38*                           |              |
| <i>Hysterochelifer cyprius</i>               |        | 5     | 14      | 1*   | 55            | 1              | 71                |               |              |                               |              |
| <i>Hysterochelifer distinguendus</i>         |        |       |         |      |               |                | 11                |               |              |                               |              |
| <i>Hysterochelifer gracilimanus</i>          |        |       |         |      |               |                | 2*                |               |              |                               |              |
| <i>Hysterochelifer tuberculatus</i>          |        |       | 9       |      | 2             | 4              | 35                |               |              |                               |              |
| <i>Rhacochelifer corcyrensis bicolor</i>     |        |       |         |      | 7             |                | 2                 | 1             | 1            | 13                            | 136          |
| <i>Rhacochelifer corcyrensis corcyrensis</i> |        |       |         |      | *             |                | *                 |               |              | *                             |              |
| <i>Rhacochelifer lobipes</i>                 |        |       | 1       |      |               |                |                   |               |              |                               |              |
| <i>Rhacochelifer longeunguiculatus</i>       |        |       | 1       |      | 7             |                | 7                 | 7             | 1            | 3                             |              |
| <i>Rhacochelifer maculatus</i>               |        |       | 3*      |      |               |                | 1                 |               |              |                               |              |
| <i>Rhacochelifer peculiaris latissimus</i>   |        |       |         |      |               |                | 2                 |               |              |                               |              |
| <i>Rhacochelifer peculiaris peculiaris</i>   |        |       |         | 6    |               |                | 5                 |               |              |                               | 1            |
| <i>Allochernes masi</i>                      |        |       | 2       |      | 5             |                | 3                 |               |              |                               | 3            |
| <i>Chernes rhodinus</i>                      |        |       | 5*      |      |               |                | 22                |               |              |                               |              |
| <i>Lamprochernes nodosus</i>                 |        |       |         |      |               |                | 3                 |               |              |                               |              |
| <i>Lamprochernes savignyi</i>                |        | 1     |         |      | 8             | 78             | 4                 |               |              | 1                             |              |
| <i>Lasiochernes turcicus</i>                 |        |       | 9       |      |               |                | 4                 |               |              |                               |              |
| <i>Nudochernes spalacis</i>                  |        | 18    |         |      | 4             |                | 79                |               | 1            |                               |              |
| <i>Pselaphochernes scorpoides</i>            |        |       | 15*     |      |               |                |                   |               |              |                               |              |
| <i>Ayyalonia dimentmani</i>                  |        |       |         |      |               |                | 9                 |               |              |                               |              |





|                |    |     |    |    |     |    |     |    |   |
|----------------|----|-----|----|----|-----|----|-----|----|---|
| Cheiridiidae   |    |     |    |    |     |    | 1   | 1  |   |
| Cheliferidae   | 19 | 166 | 22 |    |     | 53 | 165 | 8  | 4 |
| Chernetidae    |    |     |    |    | 228 | 1  | 6   | 75 |   |
| Chthoniidae    |    |     |    |    |     | 4  | 1   | 85 |   |
| Garypidae      |    |     |    | 32 |     |    |     |    |   |
| Garypinidae    |    |     | 5  |    |     | 35 |     |    |   |
| Geogarypidae   |    |     |    |    |     | 10 |     |    |   |
| Hesperolpiidae |    |     | 2  |    | 1   |    | 6   |    |   |
| Menthidae      |    |     |    |    |     |    | 1   |    |   |
| Neobisiidae    |    |     | 2  |    |     | 53 | 6   | 1  |   |
| Olpiidae       |    |     | 31 | 22 | 38  | 29 | 319 |    |   |
| Syarinidae     |    |     |    |    |     |    |     | 1  |   |
| Withiidae      |    |     |    |    | 17  |    | 6   |    |   |

**Table S6.** Collection method. (The collection method of 583 specimens in the collection was specified).

| Collection method | Pitfall Traps | Sifting | Trunk Trap | Visual Search |
|-------------------|---------------|---------|------------|---------------|
| Atemnidae         |               |         |            | 1             |
| Cheiridiidae      |               |         |            | 1             |
| Cheliferidae      | 13            | 49      | 132        | 56            |
| Chernetidae       | 3             |         |            | 77            |
| Chthoniidae       | 2             | 1       |            | 53            |
| Garypidae         |               |         |            |               |
| Garypinidae       |               | 56      |            | 10            |
| Geogarypidae      |               | 8       |            |               |
| Hesperolpiidae    |               |         |            | 2             |
| Menthidae         |               |         |            |               |
| Neobisiidae       | 13            | 1       |            | 2             |
| Olpiidae          | 58            | 21      |            | 23            |
| Syarinidae        |               |         |            | 1             |
| Withiidae         |               |         |            | 17            |
